# Supplementary material for: Hypoxia Inhibits Cell Cycle Progression and Cell Proliferation in Brain Microvascular Endothelial Cells via the miR-212-3p/MCM2 Axis
Source: MDPI journal article supplement (doi:10.3390/ijms24032788), 2023-02-01
Supplement: s1 [file Supplementary Table S2-DifferentiallymiRNAs.xlsx]

## Sheet: Sheet1
red is pvalue<0.001,orange is pvalue <0.01,blue is pvalue<0.05,green is pvalue <0.1.
Index	miR_name	miR_seq	up/down	fold_change(H(mean)/C(mean))	log2(fold_change)	pvalue(t_test)	C(mean)	H(mean)	C/C1(norm)	C/C2(norm)	C/C3(norm)	H/H1(norm)	H/H2(norm)	H/H3(norm)	C/C1(raw)	C/C2(raw)	C/C3(raw)	H/H1(raw)	H/H2(raw)	H/H3(raw)	Expression level
1	PC-3p-21271_28	GTTTGGCCTTTTCTCTCCAGT	up	inf	inf	2.66765e-05	0	9.42661	0	0	0	9.33332	9.49744	9.44907	0	0	0	9	10	9	low
2	mmu-miR-465b-3p	GATCAGGGCCTTTCTAAGTAGA	up	1.40051	0.485953	7.84164e-05	114.931	160.962	118.177	114.875	111.741	157.629	164.622	160.634	135.667	102	116.667	152	173.333	153	middle
3	mmu-mir-182-p3	GTAAGGTAATGGGACCCG	down	0.151015	-2.72724	0.000101739	408.311	61.6609	403.313	408.818	412.802	75.7036	58.8841	50.3951	463	363	431	73	62	48	middle
4	mmu-miR-132-5p_L-1R+1	ACCGTGGCTTTCGATTGTTACT	up	3.51503	1.81354	0.000108403	74.0806	260.395	80.14	85.5928	56.5089	273.777	245.984	261.424	92	76	59	264	259	249	middle
5	mmu-miR-22-3p	AAGCTGCCAGTTGAAGAACTGT	up	1.29869	0.377058	0.000137953	17496	22721.9	17069.8	17729	17689.2	22855.2	23097.8	22212.7	19596	15742	18469	22039	24320	21157	high
6	mmu-miR-125b-2-3p_R-1	ACAAGTCAGGTTCTTGGGACC	down	0.682045	-0.552061	0.000256635	2280.7	1555.54	2302.28	2215.28	2324.53	1618.81	1474	1573.8	2643	1967	2427	1561	1552	1499	middle
7	mmu-miR-452-5p_L+3R-1	AACTGTTTGCAGAGGAAACTGAGA	up	3.27192	1.71014	0.00033334	104.976	343.472	120.21	97.9813	96.7356	348.444	362.802	319.169	138	87	101	336	382	304	middle
8	mmu-miR-331-5p_R-1	CTAGGTATGGTCCCAGGGATC	down	0.514193	-0.959618	0.000479071	138.003	70.9602	142.858	135.147	136.004	71.5555	63.6328	77.6924	164	120	142	69	67	74	middle
9	mmu-miR-138-1-3p_L-2R+1	GCTACTTCACAACACCAGGGC	up	10.0644	3.33119	0.000479958	3.70425	37.2811	4.35543	6.75733	0	39.4074	39.8892	32.5468	5	6	0	38	42	31	middle
10	mmu-miR-210-3p	CTGTGCGTGTGACAGCGGCTGA	up	23.1919	4.53555	0.000481138	1146.74	26595.1	1285.72	1098.07	1056.43	25393.9	27097.1	27294.2	1476	975	1103	24487	28531	25997	high
11	mmu-miR-1843b-3p_L+1R+1	TCCGATCGTTCCCCTCCATACA	up	1.7897	0.839714	0.000606015	28.0187	50.1449	28.7459	30.408	24.9022	47.7037	51.2862	51.445	33	27	26	46	54	49	middle
12	hsa-miR-4443_R+1	TTGGAGGCGTGGGTTTTT	up	9.93268	3.31218	0.000610807	5.25403	52.1865	5.22652	0	10.5356	45.6296	53.1857	57.7443	6	0	11	44	56	55	middle
13	mmu-miR-210-5p	AGCCACTGCCCACCGCACACTG	up	44.2135	5.46641	0.000665729	51.287	2267.57	60.9761	38.2915	54.5933	2145.63	2322.12	2334.97	70	34	57	2069	2445	2224	middle
14	bta-miR-4286_R+4_1	ACCCCACTCCTGGTACCAAAA	up	3.06952	1.61801	0.000755342	3.39063	10.4076	3.91989	3.37866	2.87333	9.85184	11.3969	9.97402	4.5	3	3	9.5	12	9.5	middle
15	hsa-miR-4286_R+4	ACCCCACTCCTGGTACCAAAA	up	3.06952	1.61801	0.000755342	3.39063	10.4076	3.91989	3.37866	2.87333	9.85184	11.3969	9.97402	4.5	3	3	9.5	12	9.5	middle
16	mmu-miR-503-3p_L+1	GGAGTATTGTTTCCACTGCCTGG	up	1.27599	0.351622	0.000758933	2965.92	3784.5	2946.01	3074.58	2877.16	3654.51	3852.16	3846.82	3382	2730	3004	3524	4056	3664	middle
17	mmu-miR-6539_R-3	GCACAGTGATGAACTCTGAGG	down	0.299116	-1.74122	0.00113699	129.749	38.8101	122.823	122.758	143.667	36.2963	46.5375	33.5967	141	109	150	35	49	32	middle
18	mmu-miR-183-5p	TATGGCACTGGTAGAATTCACT	up	1.24605	0.317358	0.00117499	34926.4	43519.9	35081.3	33679.7	36018.2	44311.5	43198.2	43050	40273	29905	37606	42729	45484	41004	high
19	rno-miR-1249	ACGCCCTTCCCCCCCTTCTTCA	up	2.11084	1.07782	0.00127132	1072.29	2263.43	1130.67	1019.23	1066.96	2137.33	2251.84	2401.11	1298	905	1114	2061	2371	2287	middle
20	bta-miR-4286_R+4_2	ACCCCACTCCTGGTACCAAGA	up	2.03815	1.02726	0.0014526	3.39063	6.9106	3.91989	3.37866	2.87333	7.25925	6.64821	6.82433	4.5	3	3	7	7	6.5	low
21	mmu-miR-874-5p_R+1	CGGCCCCACGCACCAGGGTAAGA	up	5.56951	2.47755	0.00147726	56.3118	313.629	56.6206	52.9324	59.3822	303.852	301.069	335.967	65	47	62	293	317	320	middle
22	cgr-miR-1260	ATCCCACCGCTGCCACCA	up	1.55386	0.635855	0.0015288	2851.7	4431.13	2858.04	2767.69	2929.36	4254.96	4406.81	4631.62	3281	2457.5	3058.5	4103	4640	4411.5	middle
23	mmu-miR-871-3p	TGACTGGCACCATTCTGGATAAT	up	1.611	0.687954	0.00160186	140.676	226.629	135.89	132.894	153.244	234.37	235.536	209.979	156	118	160	226	248	200	middle
24	mmu-miR-326-3p	CCTCTGGGCCCTTCCTCCAGT	up	1.73239	0.79276	0.00179452	5250.07	9095.15	5653.35	5013.94	5082.93	8401.03	9449	9435.43	6490	4452	5307	8101	9949	8987	high
25	mmu-miR-31-5p_R+1	AGGCAAGATGCTGGCATAGCTGT	up	1.79031	0.84021	0.00186453	1910.45	3420.3	1920.75	1867.28	1943.33	3497.92	3250.02	3512.96	2205	1658	2029	3373	3422	3346	middle
26	mmu-miR-700-5p_R+1	TAAGGCTCCTTCCTGTGCTTGCA	up	1.41178	0.497512	0.00187298	889.324	1255.53	923.352	880.705	863.916	1212.3	1235.62	1318.67	1060	782	902	1169	1301	1256	middle
27	mmu-miR-147-3p_R-1	GTGTGCGGAAATGCTTCTGCT	up	2.69384	1.42966	0.00204826	203.857	549.159	192.51	208.351	210.711	574.518	508.113	564.845	221	185	220	554	535	538	middle
28	mmu-miR-301a-5p	GCTCTGACTTTATTGCACTACT	down	0.536349	-0.898755	0.0021845	394.274	211.469	385.02	384.041	413.76	245.778	197.547	191.081	442	341	432	237	208	182	middle
29	mmu-miR-148b-5p	GAAGTTCTGTTATACACTCAGGCT	down	0.545955	-0.873145	0.00221885	273.441	149.287	260.455	291.691	268.178	134.815	137.713	175.333	299	259	280	130	145	167	middle
30	mmu-let-7f-1-3p_1ss22CT	CTATACAATCTATTGCCTTCCT	down	0.611232	-0.710209	0.00227229	629.419	384.72	578.401	644.199	665.656	420	385.596	348.566	664	572	695	405	406	332	middle
31	mmu-miR-17-5p	CAAAGTGCTTACAGTGCAGGTAG	down	0.625466	-0.676997	0.00236997	31452.8	19672.7	31124.5	33169.8	30064.2	22134.5	18930.3	17953.2	35730.7	29452.3	31389.5	21344	19932	17100	high
32	mmu-miR-18a-3p_R+1	ACTGCCCTAAGTGCTCCTTCTGG	down	0.655959	-0.608322	0.00248676	580.129	380.541	570.562	578.878	590.949	358.814	372.3	410.51	655	514	617	346	392	391	middle
33	mmu-miR-574-5p	TGAGTGTGTGTGTGTGAGTGTGT	up	1.69597	0.762112	0.00261977	1995.71	3384.67	2227.37	2001.3	1758.48	3253.18	3396.28	3504.56	2557	1777	1836	3137	3576	3338	middle
34	mmu-miR-135a-2-3p_R+1	TGTAGGGATGGAAGCCATGAAT	down	-inf	-inf	0.00270353	7.10052	0	7.83978	6.75733	6.70445	0	0	0	9	6	7	0	0	0	low
35	mmu-miR-128-1-5p_R+2	CGGGGCCGTAGCACTGTCTGAGA	down	0.07584	-3.7209	0.00284345	23.0726	1.74983	27.8748	20.272	21.0711	0	0	5.24949	32	18	22	0	0	5	middle
36	mmu-miR-181a-5p_R+2	AACATTCAACGCTGTCGGTGAGTTT	down	0.883788	-0.178227	0.00306167	22647.2	20015.3	23017.6	22844.8	22079.2	20294.3	19429.4	20322.3	26424	20284.5	23052.5	19569.5	20457.5	19356.5	high
37	mmu-miR-16-1-3p_R+1	CCAGTATTGACTGTGCTGCTGAA	down	0.312273	-1.67912	0.00312692	187.37	58.5104	209.061	176.817	176.231	88.1481	47.4872	39.8961	240	157	184	85	50	38	middle
38	hsa-miR-7977_1ss6AG	TTCCCGGCCAACGCACCA	down	0.534126	-0.904749	0.0031707	1771.7	946.313	1620.22	1746.77	1948.12	853.481	865.217	1120.24	1860	1551	2034	823	911	1067	middle
39	mmu-miR-879-3p_L-1R+1	CTTATGGCTTCAAGCTTTCGGT	down	0.606435	-0.721575	0.00327874	64.1694	38.9146	68.8158	58.5635	65.1289	35.2592	43.6882	37.7963	79	52	68	34	46	36	middle
40	mmu-miR-20a-5p	TAAAGTGCTTATAGTGCAGGTAG	down	0.596093	-0.74639	0.00332254	25712.2	15326.9	24700.2	27075.9	25360.5	17476.1	15025.9	13478.6	28355.7	24041.3	26478.5	16852	15821	12838	high
41	hsa-mir-1260b-p5_1ss8AG	TCCCACCGCTGCCACCATT	up	2.53908	1.34431	0.00396831	9.02406	22.9128	8.71087	10.6991	7.66222	20.2222	22.7939	25.7225	10	9.5	8	19.5	24	24.5	middle
42	mmu-miR-338-5p_R-1	AACAATATCCTGGTGCTGAGT	up	1.87065	0.903542	0.00402628	879.071	1644.44	931.192	782.724	923.298	1587.7	1815.91	1529.7	1069	695	964	1531	1912	1457	middle
43	mmu-miR-25-5p_R+1	AGGCGGAGACTTGGGCAATTGCT	down	0.501128	-0.99675	0.00449494	390.699	195.79	429.446	373.906	368.744	180.444	203.245	203.68	493	332	385	174	214	194	middle
44	dno-miR-503-5p_R+2	TAGCAGCGGGAACAGTACTGCAGAA	down	0.513516	-0.961519	0.00455913	310.634	159.516	333.626	324.352	273.924	196	148.16	134.387	383	288	286	189	156	128	middle
45	bta-miR-2478_L-2	ATCCCACTTCTGACACCA	up	1.20784	0.272435	0.00469003	1993.13	2407.4	2048.8	1993.97	1936.63	2496.15	2315.48	2410.56	2352	1770.5	2022	2407	2438	2296	middle
46	mmu-miR-132-3p	TAACAGTCTACAGCCATGGTCG	up	3.10029	1.6324	0.00480641	714.946	2216.54	662.897	706.141	775.8	1961.04	2342.07	2346.52	761	627	810	1891	2466	2235	middle
47	mmu-miR-3099-3p	TAGGCTAGAGAGAGGTTGGGGA	up	4.0872	2.03111	0.00504187	141.042	576.465	153.311	106.991	162.822	498.814	576.495	654.086	176	95	170	481	607	623	middle
48	rno-mir-3099-p5_1ss3GA	GAACGATCGATCCCCATC	up	11.2185	3.48781	0.005083	1.74217	19.5446	5.22652	0	0	20.7407	18.9949	18.8981	6	0	0	20	20	18	middle
49	mmu-miR-5099_L+2R-1	TCTTAGATCGATGTGGTGCTC	up	1.23418	0.303558	0.00538414	31723.2	39152.3	32032.5	31714.4	31422.8	37963.8	40281.5	39211.6	36773	28160	32808	36608	42413	37348	high
50	mmu-miR-344-3p	TGATCTAGCCAAAGCCTGACTGT	down	0.845454	-0.242202	0.00549516	509.127	430.444	496.084	501.169	530.13	449.037	425.485	416.809	569.5	445	553.5	433	448	397	middle
51	mmu-miR-582-3p_L-1R+2	AACCTGTTGAACAACTGAACCC	up	1.88119	0.911647	0.00555102	1069.6	2012.11	980.843	916.744	1311.2	2146.66	1983.07	1906.61	1126	814	1369	2070	2088	1816	middle
52	mmu-miR-32-3p	CAATTTAGTGTGTGTGATATT	down	0.420719	-1.24907	0.00560001	138.424	58.2374	128.921	159.923	126.427	61.1851	68.3816	45.1456	148	142	132	59	72	43	middle
53	mmu-miR-1955-3p	GAGCATTGCATGCTGGGACAT	down	-inf	-inf	0.00573231	4.92514	0	4.35543	5.63111	4.78889	0	0	0	5	5	5	0	0	0	low
54	PC-5p-24284_22	GTGGGGTCCGGGGCAGAGACGGGA	down	-inf	-inf	0.00601507	7.21446	0	6.09761	7.88355	7.66222	0	0	0	7	7	8	0	0	0	low
55	mmu-miR-5622-5p	TTCACCACACCCAGCTTAAAGA	up	inf	inf	0.00634007	0	5.40681	0	0	0	6.22222	4.74872	5.24949	0	0	0	6	5	5	low
56	mmu-miR-92a-1-5p	AGGTTGGGATTTGTCGCAATGCT	down	0.17448	-2.51887	0.0065942	162.173	28.296	153.311	191.458	141.751	28	37.9898	18.8981	176	170	148	27	40	18	middle
57	hsa-miR-4286_R+1	ACCCCACTCCTGGTACCA	down	0.725066	-0.463815	0.00664762	1242.02	900.549	1144.61	1276.01	1305.45	959.258	820.579	921.81	1314	1133	1363	925	864	878	middle
58	pal-miR-9226-5p_L-1_1ss4AG	CAGGTCCCTGTTCGGGCGCCA	down	0.613693	-0.704412	0.00704978	116.417	71.4441	114.548	128.389	106.313	65.3333	65.5323	83.4668	131.5	114	111	63	69	79.5	middle
59	mmu-miR-214-5p	TGCCTGTCTACACTTGCTGTGC	down	-inf	-inf	0.00714638	5.2444	0	4.35543	5.63111	5.74667	0	0	0	5	5	6	0	0	0	low
60	cgr-miR-1260_L+1_1ss10GA	AATCCCACCACTGCCACCA	up	inf	inf	0.0072862	0	3.70322	0	0	0	3.11111	3.79898	4.19959	0	0	0	3	4	4	low
61	mmu-miR-15a-5p	TAGCAGCACATAATGGTTTGTG	down	0.639177	-0.645713	0.00779726	2732.91	1746.81	2441.66	2880.87	2876.21	2017.03	1610.77	1612.64	2803	2558	3003	1945	1696	1536	middle
62	mmu-miR-874-3p_R+1	CTGCCCTGGCCCGAGGGACCGAC	up	4.50211	2.1706	0.00785689	3344.89	15059	3579.29	3092.6	3362.76	13644.3	14314.5	17218.3	4109	2746	3511	13157	15072	16400	high
63	eca-mir-8969-p5_1ss14GT	GGTGGTTCAGTGGTAGAA	up	2.31972	1.21395	0.00825636	5.85485	13.5816	4.35543	5.068	8.14111	14	15.1959	11.5489	5	4.5	8.5	13.5	16	11	middle
64	mmu-mir-466d-p5_1ss22AT	TATACATACACGCACACATAGT	down	0.866028	-0.207514	0.00835883	401.734	347.913	387.634	400.935	416.633	340.666	341.908	361.165	445	356	435	328.5	360	344	middle
65	mmu-miR-138-5p	AGCTGGTGTTGTGAATCAGGCCG	up	1.57636	0.656593	0.00854747	505.514	796.869	505.666	502.295	508.58	850.888	761.22	778.499	580.5	446	531	820.5	801.5	741.5	middle
66	PC-5p-22123_26	AAGGAGTAGCCTGTCTTT	down	0.0484379	-4.36772	0.00865799	32.6791	1.58291	34.8435	38.2915	24.9022	0	4.74872	0	40	34	26	0	5	0	middle
67	mmu-miR-466b-3p	ATACATACACGCACACATAAGA	down	0.766002	-0.38458	0.00897277	2475.34	1896.11	2382.13	2402.32	2641.55	1817.23	1914.45	1956.66	2734.67	2133.08	2758	1752.33	2015.75	1863.67	middle
68	mmu-miR-466e-3p_L-1	ATACATACACGCACACATAAGA	down	0.766002	-0.38458	0.00897277	2475.34	1896.11	2382.13	2402.32	2641.55	1817.23	1914.45	1956.66	2734.67	2133.08	2758	1752.33	2015.75	1863.67	middle
69	mmu-miR-224-5p_R+1	TAAGTCACTAGTGGTTCCGTTT	up	1.90134	0.927017	0.00922668	1216.17	2312.36	1197.74	1241.1	1209.67	2315.7	2501.63	2119.74	1375	1102	1263	2233	2634	2019	middle
70	mmu-let-7b-3p_1ss22CT	CTATACAACCTACTGCCTTCCT	down	0.525148	-0.929205	0.0100058	1109.04	582.408	1071.44	1114.96	1140.71	451.111	642.027	654.086	1230	990	1191	435	676	623	middle
71	mmu-miR-1843b-5p_L+1R-1	CATGGAGGTCTCTGTCTGACT	up	1.36584	0.44979	0.0103947	267.083	364.794	264.81	275.924	260.516	344.296	388.92	361.165	304	245	272	332	409.5	344	middle
72	mmu-miR-181b-1-3p	CTCACTGAACAATGAATGCAA	down	0.414314	-1.2712	0.0105096	58.9655	24.4302	47.9098	61.9422	67.0445	28	28.4923	16.7984	55	55	70	27	30	16	middle
73	mmu-miR-344b-3p	CATTTAGCCAAAGCCTGACTGT	down	0.601839	-0.732551	0.0106862	72.2728	43.4966	66.2026	72.0782	78.5378	43.5555	41.7887	45.1456	76	64	82	42	44	43	middle
74	PC-5p-5230_228	TCTGGACACATGTGGCTTTT	down	0.0640289	-3.96513	0.0107401	111.318	7.12754	117.597	88.9715	127.384	5.18518	5.69846	10.499	135	79	133	5	6	10	middle
75	mmu-miR-20a-3p_R+1	ACTGCATTACGAGCACTTAAAGT	down	0.540061	-0.888805	0.0107929	448.528	242.233	398.958	431.343	515.285	289.333	243.134	194.231	458	383	538	279	256	185	middle
76	hsa-miR-4454_L-3R+1_1	TCCGAGTCACGGCACCAA	up	1.67563	0.744708	0.0109068	799.375	1339.46	803.577	684.179	910.368	1248.59	1247.96	1521.83	922.5	607.5	950.5	1204	1314	1449.5	middle
77	hsa-miR-4454_L-3R+1_2	TCCGAGTCACGGCACCAT	up	1.67563	0.744708	0.0109068	799.375	1339.46	803.577	684.179	910.368	1248.59	1247.96	1521.83	922.5	607.5	950.5	1204	1314	1449.5	middle
78	PC-3p-14858_51	ATTAGGGTGCAGAGCCAGGA	up	inf	inf	0.01113	0	17.1248	0	0	0	13.4815	18.9949	18.8981	0	0	0	13	20	18	middle
79	rno-miR-351-5p_R+1_1ss24GA	TCCCTGAGGAGCCCTTTGAGCCTAAG	down	0.111144	-3.1695	0.0111989	17.0904	1.89949	17.4217	21.3982	12.4511	0	5.69846	0	20	19	13	0	6	0	middle
80	bta-miR-2478_L+2	TCGTATCCCACTTCTGACACCA	up	1.31656	0.396774	0.0112069	389.276	512.506	405.926	406.566	355.336	499.851	484.369	553.296	466	361	371	482	510	527	middle
81	cfa-miR-339_R+4	TCCCTGTCCTCCAGGAGCTCAAT	up	1.66336	0.734101	0.011236	383.748	638.311	378.487	386.294	386.463	590.073	638.228	686.633	434.5	343	403.5	569	672	654	middle
82	ssc-miR-339-5p_R+1_1ss22CA	TCCCTGTCCTCCAGGAGCTCAAT	up	1.66336	0.734101	0.011236	383.748	638.311	378.487	386.294	386.463	590.073	638.228	686.633	434.5	343	403.5	569	672	654	middle
83	mmu-miR-93-3p_R+1	ACTGCTGAGCTAGCACTTCCCGA	down	0.724773	-0.464399	0.0116246	379.415	274.99	359.759	363.77	414.718	258.222	270.677	296.071	413	323	433	249	285	282	middle
84	mmu-miR-542-5p	CTCGGGGATCATCATGTCACGA	up	1.34508	0.427695	0.0122408	3017.46	4058.73	3300.55	2698.43	3053.4	3900.29	4036.41	4239.48	3789	2396	3188	3761	4250	4038	middle
85	mmu-miR-335-3p	TTTTTCATTATTGCTCCTGACC	up	1.63777	0.711734	0.012445	57987.1	94969.6	53952.5	58895.7	61112.9	102840	97639.4	84429.6	61937	52295	63807	99167	102806	80417	high
86	mmu-miR-466f-3p_L-1R+2	ATACACACACACATACACACTC	down	0.708554	-0.497051	0.0132242	1787.5	1266.54	1774.11	1710.35	1878.04	1149.73	1208.39	1441.51	2036.67	1518.67	1960.83	1108.67	1272.33	1373	middle
87	mmu-miR-152-5p	TAGGTTCTGTGATACACTCCGACT	up	1.13616	0.18417	0.0133275	241.386	274.254	248.26	229.749	246.149	278.963	279.225	264.574	285	204	257	269	294	252	middle
88	mmu-miR-183-3p_L-1	TGAATTACCGAAGGGCCATAA	up	1.35286	0.436012	0.0134176	833.216	1127.22	869.344	775.967	854.338	1031.85	1143.49	1206.33	998	689	892	995	1204	1149	middle
89	mmu-miR-92a-3p_R+1	TATTGCACTTGTCCCGGCCTGT	down	0.705704	-0.502864	0.0134291	74330.1	52455.1	76969.6	75579.6	70441.2	45016.7	55697.3	56651.4	88360.5	67109	73546.5	43409	58644.5	53959	high
90	mmu-miR-129-1-3p	AAGCCCTTACCCCAAAAAGTAT	up	6.95445	2.79794	0.0141043	4.77514	33.2085	5.22652	0	9.09889	29.037	27.5426	43.0458	6	0	9.5	28	29	41	middle
91	mmu-miR-212-3p	TAACAGTCTCCAGTCACGGCCA	up	5.13412	2.36012	0.0141634	251.002	1288.68	244.775	241.011	267.22	1053.63	1326.79	1485.6	281	214	279	1016	1397	1415	middle
92	mmu-miR-30e-3p	CTTTCAGTCGGATGTTTACAGC	down	0.77838	-0.361453	0.0142336	1456.08	1133.38	1361.94	1487.74	1518.56	1163.55	1216.62	1019.98	1563.5	1321	1585.5	1122	1281	971.5	middle
93	mmu-mir-5128-p5	GGTCTTTCTAGCTCCTGTTTT	down	-inf	-inf	0.0144553	7.36363	0	7.83978	5.63111	8.62	0	0	0	9	5	9	0	0	0	low
94	PC-3p-6296_174	GGATATGATGTGAGGCCTGATC	down	0.23033	-2.11822	0.0147716	46.3539	10.6767	50.523	54.0586	34.48	5.18518	14.2462	12.5988	58	48	36	5	15	12	middle
95	mmu-miR-7118-3p	TAACTCTACGTCCTCCTCCACA	up	inf	inf	0.0148638	0	6.10674	0	0	0	6.22222	4.74872	7.34928	0	0	0	6	5	7	low
96	mmu-miR-93-5p	CAAAGTGCTGTTCGTGCAGGTAG	down	0.792208	-0.336049	0.0153851	49581.9	39279.2	52875	48861.1	47009.7	40697.4	41527.6	35612.5	60700	43385	49082	39244	43725	33920	high
97	mmu-mir-6236-p5	GAATCAACTAGCCCTGAAAA	down	0.292287	-1.77454	0.0154004	167.66	49.0049	135.018	206.099	161.864	16.5926	87.3764	43.0458	155	183	169	16	92	41	middle
98	mmu-miR-212-5p	ACCTTGGCTCTAGACTGCTTACT	up	3.09192	1.6285	0.015471	105.645	326.646	102.788	112.622	101.524	270.666	342.858	366.414	118	100	106	261	361	349	middle
99	mmu-miR-1943-5p_L-1	AGGGAGGATCTGGGCACCTGGA	up	1.3043	0.383275	0.0155713	526.677	686.944	565.335	521.441	493.256	636.74	682.866	741.227	649	463	515	614	719	706	middle
100	mmu-miR-500-3p_R-1	AATGCACCTGGGCAAGGGTTC	up	1.30326	0.382128	0.0156399	1557.59	2029.95	1598.44	1574.46	1499.88	1939.26	1967.87	2182.74	1835	1398	1566	1870	2072	2079	middle
101	mmu-miR-185-5p	TGGAGAGAAAGGCAGTTCCTGA	down	0.854809	-0.226326	0.0156973	1412.8	1207.68	1464.3	1437.06	1337.06	1205.04	1253.66	1164.34	1681	1276	1396	1162	1320	1109	middle
102	mmu-miR-181a-1-3p	ACCATCGACCGTTGATTGTACC	down	0.592018	-0.756286	0.0158501	530.116	313.839	513.07	542.839	534.44	341.185	350.456	249.876	589	482	558	329	369	238	middle
103	mmu-miR-470-5p	TTCTTGGACTGGCACTGGTGAGT	up	1.54931	0.631625	0.0159397	264.819	410.287	284.845	295.07	214.542	390.963	408.39	431.508	327	262	224	377	430	411	middle
104	mmu-miR-5128	CAATTGGGGCTGGCGAGATGGCT	down	0.461658	-1.1151	0.0160419	94.3236	43.5452	91.4641	95.7288	95.7778	51.8518	49.3867	29.3971	105	85	100	50	52	28	middle
105	mmu-miR-107-3p_R-2	AGCAGCATTGTACAGGGCTAT	down	0.883369	-0.178912	0.0161553	3662.41	3235.26	3742.19	3532.21	3712.83	3095.21	3235.14	3375.42	4296	3136.33	3876.5	2984.67	3406.33	3215	middle
106	hsa-miR-339-5p_R+3	TCCCTGTCCTCCAGGAGCTCACGAGT	up	3.65801	1.87106	0.016175	9.11543	33.3443	13.9374	0	13.4089	40.4444	32.2913	27.2973	16	0	14	39	34	26	middle
107	mmu-miR-298-3p	GAGGAACTAGCCTTCTCTCAGCTT	down	0.690613	-0.534051	0.016343	84.0561	58.0502	86.2376	91.2239	74.7067	66.3703	53.1857	54.5947	99	81	78	64	56	52	middle
108	mmu-miR-26a-1-3p	CCTATTCTTGGTTACTTGCACG	down	0.127578	-2.97055	0.0164117	12.4074	1.58291	16.5506	10.136	10.5356	0	4.74872	0	19	9	11	0	5	0	middle
109	PC-3p-8097_119	TGATATAGCCAAGCCCGACTGT	up	2.02076	1.0149	0.016634	14.2957	28.8882	15.6796	9.00977	18.1978	25.9259	31.3415	29.3971	18	8	19	25	33	28	middle
110	mmu-miR-486b-3p_R+2	CGGGGCAGCTCAGTACAGGATG	up	6.25269	2.64448	0.0167586	1.01627	6.35441	3.0488	0	0	6.74073	7.59795	4.72454	3.5	0	0	6.5	8	4.5	low
111	mmu-miR-491-5p_R+1	AGTGGGGAACCCTTCCATGAGGA	up	3.19391	1.67532	0.0168116	31.0814	99.271	25.2615	38.2915	29.6911	83.9999	93.0749	120.738	29	34	31	81	98	115	middle
112	mmu-miR-375-3p	TTTGTTCGTTCGGCTCGCGTGA	up	3.93739	1.97724	0.0172487	4.20956	16.5747	7.83978	0	4.78889	17.6296	14.2462	17.8483	9	0	5	17	15	17	middle
113	mmu-miR-17-3p	ACTGCAGTGAGGGCACTTGTAG	down	0.752827	-0.409609	0.0174278	3374.04	2540.07	3513.96	3095.98	3512.17	2484.74	2494.98	2640.49	4034	2749	3667	2396	2627	2515	middle
114	pal-miR-9226-5p_1ss15GA	TCAAGTCCCTGTTCAGGCGCCA	down	0.450469	-1.1505	0.017529	24.1772	10.8911	26.5681	19.1458	26.8178	9.85184	7.59795	15.2235	30.5	17	28	9.5	8	14.5	middle
115	efu-miR-9226_L-3_1ss22GA	AGTCCCTGTTCGGGCGCCA	up	1.43942	0.525483	0.0176672	358.869	516.561	401.571	331.672	343.363	476	496.241	577.443	461	294.5	358.5	459	522.5	550	middle
116	mmu-miR-491-3p	CTTATGCAAGATTCCCTTCTAC	up	inf	inf	0.0178959	0	9.01416	0	0	0	8.29629	11.3969	7.34928	0	0	0	8	12	7	middle
117	mmu-miR-615-5p	GGGGGTCCCCGGTGCTCGGATC	down	0.397213	-1.33202	0.0179896	73.8494	29.3339	90.593	68.6995	62.2556	22.8148	38.9395	26.2474	104	61	65	22	41	25	middle
118	mmu-miR-219b-5p_L-1	GATGTCCAGCCACAATTCTCG	up	inf	inf	0.0181862	0	7.01881	0	0	0	7.25925	8.5477	5.24949	0	0	0	7	9	5	low
119	mmu-miR-30e-5p_R+2	TGTAAACATCCTTGACTGGAAGCT	down	0.782051	-0.354665	0.0184087	31684.5	24778.9	31769	30592.7	32691.8	27204	22862.7	24269.9	36470.5	27164	34133	26232.5	24072.5	23116.5	high
120	mmu-miR-339-5p_R-3	TCCCTGTCCTCCAGGAGCTC	up	1.24421	0.31523	0.0184984	10252.2	12755.9	10922.6	9621.31	10212.8	11887.5	13615.5	12764.7	12539	8543	10663	11463	14336	12158	high
121	bta-miR-2478_L-1_1ss2TG	GATCCCACTTCTGACACCA	up	2.70126	1.43363	0.0188694	28.535	77.0805	42.6832	18.0195	24.9022	58.074	90.2257	82.9419	49	16	26	56	95	79	middle
122	mmu-let-7b-5p	TGAGGTAGTAGGTTGTGTGGTT	up	1.23123	0.300097	0.0191109	54753.3	67413.7	57476	55833.7	50950.1	66892	68281.9	67067.3	65982	49576.2	53196.2	64503.1	71895.1	63879.8	high
123	mmu-miR-466p-5p_L-2R+3	TGTGTGTGTACATGTACATGTG	down	0.716258	-0.481449	0.0194433	161.807	115.896	143.512	172.687	169.223	127.158	110.028	110.502	164.75	153.333	176.683	122.617	115.85	105.25	middle
124	mmu-miR-23a-3p	ATCACATTGCCAGGGATTTCC	up	1.1048	0.14378	0.0199114	126487	139743	124593	123045	131824	139699	142910	136619	143032	109255	137635	134710	150472	130126	high
125	mmu-miR-1191a_R+1	CAGTCTTACTATGTAGCCCTAT	down	0.563659	-0.827105	0.0201405	105.72	59.5902	101.046	119.379	96.7356	76.7407	57.9344	44.0957	116	106	101	74	61	42	middle
126	mmu-miR-199a-5p	CCCAGTGTTCAGACTACCTGTTC	down	0.603924	-0.727561	0.0206348	275.401	166.321	285.716	242.138	298.348	172.148	161.456	165.359	328	215	311.5	166	170	157.5	middle
127	mmu-miR-452-3p	TCAGTCTCATCTGCAAAGAGGT	up	4.02452	2.00882	0.0214323	15.5086	62.4148	13.0663	12.3884	21.0711	78.8147	56.9846	51.445	15	11	22	76	60	49	middle
128	hsa-miR-1261_R-1_1ss12TA	ATGGATAAGGCATTGGCT	down	-inf	-inf	0.0219128	6.69621	0	8.71087	5.63111	5.74667	0	0	0	10	5	6	0	0	0	low
129	mmu-miR-423-3p	AGCTCGGTCTGAGGCCCCTCAGT	up	1.45609	0.542097	0.0221949	13045.2	18995	13976.6	12898.6	12260.5	16705.6	20409	19870.4	16045	11453	12801	16109	21489	18926	high
130	mmu-miR-181b-5p	AACATTCATTGCTGTCGGTGGGTT	down	0.840564	-0.250571	0.0222168	14902.9	12526.9	15621.3	14941.2	14146.2	11822	12292.4	13466.2	17933.2	13266.7	14769.8	11399.8	12942.8	12826.2	high
131	mmu-miR-31-3p	TGCTATGCCAACATATTGCCATC	up	1.6699	0.739761	0.0223804	145.99	243.789	111.499	146.409	180.062	280	229.838	221.528	128	130	188	270	242	211	middle
132	mmu-miR-7a-1-3p	CAACAAATCACAGTCTGCCATA	down	0.766693	-0.383278	0.0226348	586.602	449.744	541.816	593.519	624.471	476	480.57	392.662	622	527	652	459	506	374	middle
133	mmu-miR-155-3p_R+1	CTCCTACCTGTTAGCATTAACA	down	0.536009	-0.899671	0.0233517	15.1236	8.10638	12.1952	16.8933	16.2822	6.22222	7.59795	10.499	14	15	17	6	8	10	middle
134	mmu-miR-409-3p	GAATGTTGCTCGGTGAACCCCT	up	inf	inf	0.0236196	0	9.05612	0	0	0	6.22222	10.4472	10.499	0	0	0	6	11	10	middle
135	sha-miR-21_L+3R-2	AAATAGCTTATCAGACTGATGTTGAC	down	0.148506	-2.75141	0.0236682	10.6589	1.58291	6.96869	13.5147	11.4933	0	4.74872	0	8	12	12	0	5	0	middle
136	PC-3p-4531_282	CAAAATGATGATGATGCTGATT	down	0.415136	-1.26834	0.0237826	79.2352	32.8934	79.2689	92.3502	66.0867	52.8888	23.7436	22.0478	91	82	69	51	25	21	middle
137	mmu-miR-3968_L-3_1ss14AT	ATCCCACTCCTGACACCA	up	1.27466	0.350109	0.0238376	3027.77	3859.37	3187.31	2804.29	3091.71	3757.18	3611.88	4209.04	3659	2490	3228	3623	3803	4009	middle
138	mmu-miR-28a-3p	CACTAGATTGTGAGCTGCTGGA	up	1.08777	0.121376	0.0241917	1330.98	1447.8	1336.25	1362.73	1293.96	1444.59	1493	1405.81	1534	1210	1351	1393	1572	1339	middle
139	mmu-miR-30b-3p	CTGGGATGTGGATGTTTACGTC	down	0.879762	-0.184814	0.0246166	480.81	422.998	505.23	470.761	466.438	424.148	411.239	433.608	580	418	487	409	433	413	middle
140	mmu-miR-19b-1-5p	AGTTTTGCAGGTTTGCATCCAGC	down	0.298928	-1.74213	0.0246186	124.785	37.3017	94.0773	138.525	141.751	42.5185	38.9395	30.447	108	123	148	41	41	29	middle
141	mmu-miR-130a-5p	GCTCTTTTCACATTGTGCTACT	down	0.508102	-0.976811	0.0246235	280.207	142.374	244.775	340.119	255.727	186.666	129.165	111.289	281	302	267	180	136	106	middle
142	mmu-miR-1954	ACTGCAGAGTGAGACCCTGTT	down	0.701086	-0.512337	0.0247492	156.401	109.65	161.151	138.525	169.527	92.2962	125.366	111.289	185	123	177	89	132	106	middle
143	mmu-miR-664-3p_R-1	TATTCATTTACTCCCCAGCCT	up	1.31956	0.400062	0.0257353	416.66	549.809	430.317	382.915	436.747	492.592	588.841	567.994	494	340	456	475	620	541	middle
144	mmu-let-7c-1-3p	CTGTACAACCTTCTAGCTTTCC	down	0.213091	-2.23046	0.0260799	78.7381	16.7784	74.0424	59.6897	102.482	24.8889	7.59795	17.8483	85	53	107	24	8	17	middle
145	mmu-let-7i-3p	CTGCGCAAGCTACTGCCTTGCT	down	0.68085	-0.554591	0.0261651	590.838	402.272	599.308	582.256	590.949	446.962	420.737	339.117	688	517	617	431	443	323	middle
146	mmu-miR-3544-5p	AGAAAGGCATCATATAGGAGCTG	up	14.2148	3.82933	0.0266464	2.23482	31.7675	0	0	6.70445	22.8148	29.4421	43.0458	0	0	7	22	31	41	middle
147	mmu-miR-345-5p_L+1R-1	TGCTGACCCCTAGTCCAGTGCT	down	0.889882	-0.168313	0.0268569	2092.78	1862.33	2013.95	2166.85	2097.53	1854.22	1888.09	1844.67	2312	1924	2190	1788	1988	1757	middle
148	mmu-miR-26a-2-3p	CCTGTTCTTGATTACTTGTTTC	down	0.352668	-1.50362	0.0270204	64.8789	22.8807	49.6519	66.4471	78.5378	28	22.7939	17.8483	57	59	82	27	24	17	middle
149	mmu-miR-878-3p	GCATGACACCACACTGGGTAGA	up	1.84268	0.881806	0.0279093	31.1967	57.4855	36.5856	22.5244	34.48	45.6296	61.7334	65.0936	42	20	36	44	65	62	middle
150	mmu-miR-674-5p_R-1	GCACTGAGATGGGAGTGGTGT	up	1.26678	0.341169	0.0279668	5791.78	7336.92	5880.71	5631.11	5863.52	6814.36	7355.77	7840.63	6751	5000	6122	6571	7745	7468	high
151	mmu-miR-465c-5p	TATTTAGAATGGCGCTGATCTG	up	1.30012	0.37864	0.0283708	141.263	183.658	138.503	146.409	138.878	176.296	200.396	174.283	159	130	145	170	211	166	middle
152	mmu-miR-935_L-2	CAGTTACCGCTTCCGCTACCGC	up	2.55653	1.35419	0.0287383	26.8314	68.5951	37.4567	12.3884	30.6489	50.8148	83.5775	71.393	43	11	32	49	88	68	middle
153	mmu-miR-1941-3p_R+1	CATCTTAGCAGTATCTCCCATC	up	1.55096	0.633159	0.0290039	42.6094	66.0854	51.3941	37.1653	39.2689	69.4814	73.1303	55.6446	59	33	41	67	77	53	middle
154	mmu-miR-676-5p	ACTCTACAACCTTAGGACTTGC	down	0.599337	-0.738561	0.0290049	141.618	84.877	115.855	157.671	151.329	74.6666	105.422	74.5427	133	140	158	72	111	71	middle
155	mmu-miR-741-5p	TACGTAGATTGGTACCTATCATG	up	8.22262	3.0396	0.0290242	1.74217	14.3252	5.22652	0	0	17.6296	8.5477	16.7984	6	0	0	17	9	16	middle
156	mmu-miR-147-5p_R-2	TGGAAACATTTCTGCACAAACT	up	2.97661	1.57367	0.029275	26.4835	78.831	23.5193	28.1555	27.7756	90.2221	86.4267	59.8441	27	25	29	87	91	57	middle
157	mmu-miR-320-3p	AAAAGCTGGGTTGAGAGGGCGA	up	1.36873	0.452843	0.0292954	12228.6	16737.6	13541.9	12237.5	10906.2	14734.2	17208.4	18270.3	15546	10866	11387	14208	18119	17402	high
158	mmu-let-7a-1-3p	CTATACAATCTACTGTCTTTCC	down	0.621464	-0.686258	0.0297885	240.663	149.563	208.19	259.031	254.769	186.666	148.635	113.389	239	230	266	180	156.5	108	middle
159	mmu-miR-1843a-5p	TATGGAGGTCTCTGTCTGACT	up	1.26759	0.342084	0.0297954	208.858	264.745	213.416	188.079	225.078	259.259	268.303	266.674	245	167	235	250	282.5	254	middle
160	mmu-miR-877-5p_R+3	GTAGAGGAGATGGCGCAGGGGAC	down	0.753045	-0.409191	0.0300837	864.143	650.739	902.446	854.802	835.182	557.925	706.609	687.683	1036	759	872	538	744	655	middle
161	mmu-miR-297c-3p_L+1R+1_1	ATATACATACACACATACCCATAA	down	-inf	-inf	0.0301633	4.15589	0	3.48435	5.63111	3.35222	0	0	0	4	5	3.5	0	0	0	low
162	mmu-miR-297c-3p_L+1R+1_2	ATATACATACACACATACCCATAT	down	-inf	-inf	0.0301633	4.15589	0	3.48435	5.63111	3.35222	0	0	0	4	5	3.5	0	0	0	low
163	mmu-miR-150-5p	TCTCCCAACCCTTGTACCAGTG	up	1.31348	0.393392	0.0303922	8142.16	10694.6	8189.08	7775.43	8461.97	9811.4	11680.9	10591.4	9401	6904	8835	9461	12299	10088	high
164	mmu-miR-3098-3p_R+1	TTCTGCTGCCTGCCTTTAGGAC	up	1.48353	0.569037	0.0329817	35.57	52.7693	38.3278	28.1555	40.2267	53.9259	45.5877	58.7942	44	25	42	52	48	56	middle
165	mmu-miR-106a-5p	CAAAGTGCTAACAGTGCAGGTAG	down	-inf	-inf	0.0332459	9.06893	0	11.3241	10.136	5.74667	0	0	0	13	9	6	0	0	0	middle
166	mmu-miR-6934-5p	TTGGTGGAGACAGCAAGGGTGG	up	inf	inf	0.0332955	0	9.32646	0	0	0	9.33332	12.3467	6.29938	0	0	0	9	13	6	middle
167	mmu-miR-741-3p	TGAGAGATGCCATTCTATGTAGA	up	1.35288	0.436031	0.0336069	180.619	244.356	172.475	183.574	185.809	267.555	245.034	220.478	198	163	194	258	258	210	middle
168	mmu-miR-182-5p	TTTGGCAATGGTAGAACTCACACCG	up	1.14204	0.191611	0.0343281	22707.1	25932.4	24025.4	21284.5	22811.4	25357.6	25395.2	27044.3	27581	18899	23817	24452	26739	25759	high
169	mmu-miR-582-5p	ATACAGTTGTTCAACCAGTTAC	up	2.00545	1.00393	0.0346442	1136.9	2280.01	935.547	1237.72	1237.45	2785.48	2132.18	1922.36	1074	1099	1292	2686	2245	1831	middle
170	mmu-miR-27b-3p	TTCACAGTGGCTAAGTTCTGC	down	0.847698	-0.238379	0.0350837	60237.5	51063.2	57432	59165.5	64115.1	55221.1	49785.6	48182.9	65931.5	52534.5	66941.5	53249	52420	45893	high
171	mmu-miR-1191b-5p_R+2	TCAGGCTACAGAGCGAGAACCTGC	down	0.422289	-1.2437	0.0355312	16.6412	7.02739	17.4217	12.3884	20.1133	5.18518	8.5477	7.34928	20	11	21	5	9	7	middle
172	mmu-miR-27a-3p	TTCACAGTGGCTAAGTTCCGC	up	1.16845	0.224599	0.0362189	54593	63789.3	51174.2	54622.3	57982.4	67691.5	60078.9	63597.5	58747.5	48500.5	60538.5	65274	63258	60575	high
173	mmu-miR-92b-3p	TATTGCACTCGTCCCGGCCTCC	down	0.799361	-0.323081	0.0367631	250.63	200.344	263.939	239.885	248.064	175.259	213.692	212.079	303	213	259	169	225	202	middle
174	mmu-miR-652-3p_R+1	AATGGCGCCACTAGGGTTGTGT	up	1.26512	0.339278	0.0369644	16076.3	20338.5	17114.2	15652.2	15462.4	18340	20795.6	21879.9	19647	13898	16144	17685	21896	20840	high
175	mmu-miR-192-5p	CTGACCTATGAATTGACAGCC	down	0.742414	-0.429704	0.0371269	870.254	646.089	824.919	804.122	981.722	695.851	653.424	588.992	947	714	1025	671	688	561	middle
176	mmu-miR-340-5p	TTATAAAGCAATGAGACTGATT	down	0.67825	-0.560112	0.0373674	2334.65	1583.47	2013.08	2330.15	2660.71	1870.81	1515.79	1363.82	2311	2069	2778	1804	1596	1299	middle
177	mmu-miR-221-5p	ACCTGGCATACAATGTAGATTTCTGT	down	0.566549	-0.819728	0.0376902	46.5479	26.3717	56.6206	42.7964	40.2267	25.9259	33.241	19.948	65	38	42	25	35	19	middle
178	mmu-miR-339-3p_R-2	TGAGCGCCTCGGCGACAGAGC	up	1.32724	0.408432	0.0379634	728.828	967.331	839.727	647.577	699.178	879.406	961.141	1061.45	964	575	730	848	1012	1011	middle
179	mmu-miR-652-5p	CAACCCTAGGAGGGGGTGCCATTC	down	0.682393	-0.551326	0.0381512	182.949	124.843	183.799	180.195	184.851	118.222	108.271	148.036	211	160	193	114	114	141	middle
180	mmu-miR-106b-3p	CCGCACTGTGGGTACTTGCTGC	down	0.859464	-0.21849	0.0382523	4350.09	3738.75	4523.55	4051.02	4475.7	3600.59	3816.07	3799.58	5193	3597	4673	3472	4018	3619	middle
181	mmu-miR-99b-3p_R+1	CAAGCTCGTGTCTGTGGGTCCGT	up	1.21153	0.276831	0.0387325	4275.34	5179.71	4677.73	4037.5	4110.78	4743.4	5409.74	5385.97	5370	3585	4292	4574	5696	5130	middle
182	rno-miR-374-3p_2ss8CG19TC	CTTAGCAGGTTGTATTATCATT	down	0.496632	-1.00975	0.0394978	42.9273	21.3191	38.3278	54.0586	36.3956	18.6666	28.4923	16.7984	44	48	38	18	30	16	middle
183	PC-3p-20478_30	TCCCATTCTCACCGCACCCAGT	down	0.19781	-2.33781	0.0397519	8.00215	1.58291	7.83978	5.63111	10.5356	0	4.74872	0	9	5	11	0	5	0	middle
184	PC-5p-13689_57	TGTCTCTCCAGCCACCTTTTA	down	0.468563	-1.09369	0.0398886	12.8904	6.03997	10.453	15.7671	12.4511	6.22222	6.64821	5.24949	12	14	13	6	7	5	middle
185	mmu-miR-181c-5p_R+2	AACATTCAACCTGTCGGTGAGTTT	up	1.16045	0.214681	0.0400835	1748.14	2028.63	1779.63	1636.4	1828.4	2171.55	1958.37	1955.96	2043	1453	1909	2094	2062	1863	middle
186	mmu-miR-3109-5p_R-1	AATGGATGCGATGGTTCCCATGC	up	3.28892	1.71761	0.0403575	5.36138	17.6331	10.453	5.63111	0	15.5555	14.2462	23.0977	12	5	0	15	15	22	middle
187	mmu-miR-30c-1-3p	CTGGGAGAGGGTTGTTTACTCC	down	0.705104	-0.504092	0.0406463	73.3972	51.7526	79.2689	77.7093	63.2133	49.7777	55.0851	50.3951	91	69	66	48	58	48	middle
188	mmu-miR-20b-5p_1ss10CT	CAAAGTGCTTATAGTGCAGGTAG	down	-inf	-inf	0.0411064	2.66417	0	2.3229	3.75407	1.91556	0	0	0	2.66667	3.33333	2	0	0	0	low
189	mmu-mir-466d-p3	TATACATACACGCACACATAGA	down	0.81257	-0.299436	0.0414254	1185.17	963.032	1089.73	1200.55	1265.22	935.406	977.286	976.404	1251	1066	1321	902	1029	930	middle
190	mmu-miR-466b-5p	TGATGTGTGTGTACATGTACAT	down	0.720556	-0.472817	0.043373	236.153	170.161	202.165	259.969	246.325	187.306	155.457	167.721	232.083	230.833	257.183	180.617	163.683	159.75	middle
191	bta-miR-378c	ACTGGACTTGGAGTCAGAAGT	up	1.2684	0.343015	0.043606	50.225	63.7057	54.4429	47.8644	48.3678	66.8888	56.5098	67.7184	62.5	42.5	50.5	64.5	59.5	64.5	middle
192	mmu-let-7g-3p_L-1R+1	CTGTACAGGCCACTGCCTTGCT	down	0.761361	-0.393347	0.0436637	178.724	136.074	195.123	173.438	167.611	158.667	122.517	127.038	224	154	175	153	129	121	middle
193	bta-miR-150	TCTCCCAACCCTTGTACCAGTGT	up	1.53676	0.619888	0.0436861	484.019	743.818	484.324	476.392	491.34	635.703	827.227	768.525	556	423	513	613	871	732	middle
194	mmu-miR-425-5p_R+2	AATGACACGATCACTCCCGTTGAGT	down	0.925633	-0.111488	0.043707	5943.11	5501.14	5889.42	5886.76	6053.16	5352.14	5423.04	5728.24	6761	5227	6320	5161	5710	5456	middle
195	mmu-miR-106b-5p	TAAAGTGCTGACAGTGCAGAT	down	0.783026	-0.352869	0.0438095	16316.4	12776.1	15268.4	16441.7	17239	14664.7	12016.2	11647.6	17528	14599	17999	14141	12652	11094	high
196	mmu-miR-125a-5p	TCCCTGAGACCCTTTAACCTGTGA	up	1.22559	0.293476	0.0438118	26087.6	31972.7	26269.4	24574.2	27419.3	30005.6	35056	30856.5	30157	21820	28628	28934	36911	29390	high
197	mmu-miR-345-3p_L+1R-1_1ss22AT	CCCTGAACTAGGGGTCTGGAGT	down	0.753067	-0.409149	0.0438573	1481.18	1115.43	1449.49	1351.47	1642.59	1075.41	1145.39	1125.49	1664	1200	1715	1037	1206	1072	middle
198	mmu-miR-532-3p	CCTCCCACACCCAAGGCTTGCA	up	1.29693	0.375102	0.0441635	843.685	1094.2	848.438	831.151	851.465	994.517	1101.7	1186.38	974	738	889	959	1160	1130	middle
199	mmu-miR-3112-5p	ACATAGAAAAGGCAGTCTGCA	down	-inf	-inf	0.0446968	6.89685	0	4.35543	6.75733	9.57778	0	0	0	5	6	10	0	0	0	low
200	mmu-miR-29b-2-5p_R-1	CTGGTTTCACATGGTGGCTTAGAT	down	0.913611	-0.130349	0.0447981	153.94	140.641	159.409	152.04	150.371	142.074	133.914	145.936	183	135	157	137	141	139	middle
201	mmu-miR-671-5p_R+1	AGGAAGCCCTGGAGGGGCTGGAGG	up	1.58056	0.66044	0.0448058	1238.22	1957.08	1236.94	1235.46	1242.24	1693.48	1939.38	2238.38	1420	1097	1297	1633	2042	2132	middle
202	mmu-miR-669c-5p_R+2	ATAGTTGTGTGTGGATGTGTGTAT	up	1.17473	0.232329	0.0449046	4240.93	4981.95	4270.07	4510.52	3942.21	5017.18	5298.62	4630.05	4902	4005	4116	4838	5579	4410	middle
203	mmu-miR-466p-5p	TATGTGTGTGTACATGTACAT	down	0.834298	-0.261366	0.0454353	126.142	105.24	116.726	128.952	132.748	115.837	101.718	98.1654	134	114.5	138.6	111.7	107.1	93.5	middle
204	pal-miR-9993b-3p_L+1_1	AATCTCGCTGGGGCCTCCA	up	1.69469	0.761018	0.0461106	14.2492	24.1479	13.0663	19.1458	10.5356	19.7037	27.5426	25.1975	15	17	11	19	29	24	middle
205	pal-miR-9993b-3p_L+1_3	GATCTCGCTGGGGCCTCCA	up	1.69469	0.761018	0.0461106	14.2492	24.1479	13.0663	19.1458	10.5356	19.7037	27.5426	25.1975	15	17	11	19	29	24	middle
206	pal-miR-9993b-3p_L+1_2	CATCTCGCTGGGGCCTCCA	up	1.69469	0.761018	0.0461106	14.2492	24.1479	13.0663	19.1458	10.5356	19.7037	27.5426	25.1975	15	17	11	19	29	24	middle
207	pal-miR-9226-5p_L-5R+1	TCCCTGTTCGGGCGCCAT	up	1.96518	0.974664	0.0467181	25.8697	50.8388	28.7459	22.5244	26.3389	40.9629	62.2082	49.3452	33	20	27.5	39.5	65.5	47	middle
208	cgr-miR-1260_1ss9GA	ATCCCACCACTGCCACCA	up	1.17108	0.227835	0.0467232	383.778	449.433	351.483	400.935	398.915	446.962	443.056	458.28	403.5	356	416.5	431	466.5	436.5	middle
209	hsa-miR-1260b_R-1	ATCCCACCACTGCCACCA	up	1.17108	0.227835	0.0467232	383.778	449.433	351.483	400.935	398.915	446.962	443.056	458.28	403.5	356	416.5	431	466.5	436.5	middle
210	mmu-miR-3066-3p	CACTTAATAGACCGCAACCTGC	down	0.209794	-2.25295	0.0480278	8.34068	1.74983	6.09761	11.2622	7.66222	0	0	5.24949	7	10	8	0	0	5	middle
211	mmu-miR-467e-5p_L-1R+1_1ss4AG	TAGGTGTGAGCATGTATATGTG	up	2.94941	1.56042	0.0481225	2.39033	7.05005	4.35543	2.81555	0	7.77777	7.59795	5.77443	5	2.5	0	7.5	8	5.5	low
212	mmu-miR-344f-3p_R+1	CTCTAGCCAGGACCTGACTACT	down	0.275348	-1.86067	0.0482589	28.6267	7.88229	31.3591	31.5342	22.9867	0	4.74872	18.8981	36	28	24	0	5	18	middle
213	eca-miR-17_R+2	CAAAGTGCTTACAGTGCAGGTAGAT	down	0.556148	-0.846459	0.0482653	230.616	128.256	270.037	233.128	188.682	130.667	129.165	124.938	310	207	197	126	136	119	middle
214	mmu-miR-466f	ACGTGTGTGTGCATGTGCATGT	down	0.729473	-0.455073	0.0485022	217.545	158.694	222.127	243.264	187.246	152.963	146.735	176.383	255	216	195.5	147.5	154.5	168	middle
215	mmu-miR-361-5p	TTATCAGAATCTCCAGGGGTAC	up	1.13429	0.181789	0.0487589	6347.57	7199.99	6518.34	6118.76	6405.62	6738.66	7506.78	7354.53	7483	5433	6688	6498	7904	7005	high
216	mmu-miR-322-5p	CAGCAGCAATTCATGTTTTGGA	down	0.680929	-0.554424	0.0488409	4059.41	2764.17	3553.16	4401.27	4223.8	3461.63	2575.71	2255.18	4079	3908	4410	3338	2712	2148	middle
217	mmu-miR-152-3p	TCAGTGCATGACAGAACTTGG	up	1.31343	0.393338	0.0489937	15555.6	20431.2	14772.8	15183.7	16710.4	23033.6	19527.7	18732.3	16959	13482	17447	22211	20561	17842	high
218	mmu-miR-3074-1-3p_R+1	GATATCAGCTCAGTAGGCACCGT	down	0.671087	-0.575429	0.0491825	110.925	74.4402	99.3039	113.748	119.722	55.9999	75.9795	91.3411	114	101	125	54	80	87	middle
219	mmu-miR-760-3p_R+2	CGGCTCTGGGTCTGTGGGGAGT	down	0.771971	-0.373382	0.0493093	44.7113	34.5158	40.07	46.1751	47.8889	35.2592	29.4421	38.8462	46	41	50	34	31	37	middle
220	mmu-miR-1198-3p	AAGCTAGCCTCTAACTCATGGC	down	0.220089	-2.18384	0.0498193	11.5074	2.53265	14.8085	10.136	9.57778	0	7.59795	0	17	9	10	0	8	0	middle
Following miRNAs do not show significant difference (p-value<0.05).
221	mmu-miR-188-5p_R+1	CATCCCTTGCATGGTGGAGGGT	down	0.892692	-0.163766	0.0502013	773.383	690.393	819.692	746.685	753.771	693.777	667.67	709.73	941	663	787	669	703	676	middle
222	mmu-miR-8112_R+2	TCTCCGCCACCTCCACCGCAGC	up	1.26914	0.343852	0.0503839	195.205	247.743	211.674	194.836	179.104	221.926	273.526	247.776	243	173	187	214	288	236	middle
223	mmu-mir-497a-p3	CGGCACTGTGGCCACGTC	down	0.295571	-1.75842	0.0506326	40.673	12.0217	54.8785	32.6604	34.48	10.3704	15.1959	10.499	63	29	36	10	16	10	middle
224	PC-5p-23224_24	TTGTGATGATGTTGATCCTGAAC	down	-inf	-inf	0.0511376	10.9908	0	15.6796	6.75733	10.5356	0	0	0	18	6	11	0	0	0	middle
225	mmu-miR-1839-3p	AGACCTACTTATCTACCAACAGC	down	0.829251	-0.27012	0.0517148	159.845	132.552	169.862	162.176	147.498	123.407	147.21	127.038	195	144	154	119	155	121	middle
226	mmu-miR-466f-3p_R+3	CATACACACACACATACACACGCT	down	0.312962	-1.67594	0.0517198	6.33608	1.98295	7.40424	3.94177	7.66222	0	3.3241	2.62474	8.5	3.5	8	0	3.5	2.5	low
227	mmu-miR-669b-3p	CATATACATACACACAAACATAT	down	0.691232	-0.532758	0.0520976	104.254	72.0638	96.6906	93.4764	122.596	66.3703	82.6277	67.1934	111	83	128	64	87	64	middle
228	hsa-miR-10527-5p_L-1	AAGCAAATGTTGGGTGAACGGC	up	2.08613	1.06083	0.0522955	20.071	41.8708	26.1326	10.136	23.9444	53.9259	37.04	34.6466	30	9	25	52	39	33	middle
229	mmu-miR-1306-5p_L-2	CCACCTCCCCTGCAAACGTCC	up	1.32085	0.401469	0.0525414	182.451	240.991	201.221	149.787	196.344	214.666	257.381	250.925	231	133	205	207	271	239	middle
230	mmu-miR-466c-5p_L-1R-4	GATGTGTGTGTGCATGTAC	up	1.94075	0.956611	0.0527066	11.6486	22.607	13.9374	12.3884	8.62	17.6296	21.8441	28.3472	16	11	9	17	23	27	middle
231	rno-mir-1249-p5	AGGAGGGAGGGGATGGGCCAAGTTC	up	inf	inf	0.0533384	0	21.8814	0	0	0	28	11.3969	26.2474	0	0	0	27	12	25	middle
232	mmu-miR-328-3p	CTGGCCCTCTCTGCCCTTCCGT	up	1.43094	0.516967	0.0539123	1546.47	2212.91	1566.21	1550.81	1522.39	1900.37	2447.49	2290.88	1798	1377	1589.5	1832.5	2577	2182	middle
233	mmu-miR-26b-3p	CCTGTTCTCCATTACTTGGCTC	down	0.760797	-0.394416	0.0542794	148.844	113.24	135.89	143.03	167.611	106.815	131.065	101.84	156	127	175	103	138	97	middle
234	mmu-miR-28c_L+1	AAGGAGCTCACAGTCTATTGA	up	1.07629	0.106064	0.0545874	1706.99	1837.21	1691.36	1697.78	1731.82	1765.9	1871.31	1874.42	1941.67	1507.5	1808.17	1702.83	1970.33	1785.33	middle
235	mmu-miR-205-3p	GATTTCAGTGGAGTGAAGCTCA	down	0.44118	-1.18056	0.0550077	47.1784	20.8142	54.0074	47.3013	40.2267	23.8518	32.2913	6.29938	62	42	42	23	34	6	middle
236	mmu-miR-27a-5p	AGGGCTTAGCTGCTTGTGAGCA	down	0.720378	-0.473175	0.0556126	795.206	572.848	914.641	773.714	697.262	628.444	534.706	555.396	1050	687	728	606	563	529	middle
237	mmu-let-7a-2-3p_R+1	CTGTACAGCCTCCTAGCTTTCC	down	0.517962	-0.949081	0.0566032	18.2325	9.44376	22.6483	15.7671	16.2822	5.18518	9.49744	13.6487	26	14	17	5	10	13	middle
238	mmu-miR-18a-5p	TAAGGTGCATCTAGTGCAGATAG	down	0.704178	-0.505988	0.0567455	3119.57	2196.73	2734.34	3332.49	3291.88	2738.81	1967.87	1883.52	3139	2959	3437	2641	2072	1794	middle
239	mmu-miR-24-1-5p	GTGCCTACTGAGCTGATATCAGT	down	0.472354	-1.08206	0.0570091	64.7667	30.5928	46.1676	81.0879	67.0445	24.8889	22.7939	44.0957	53	72	70	24	24	42	middle
240	mmu-miR-675-3p_L-1	TGTATGCCCTAACCGCTCAGT	down	0.900968	-0.150452	0.0570476	1469.77	1324.21	1397.22	1471.97	1540.11	1318.07	1300.2	1354.37	1604	1307	1608	1271	1369	1290	middle
241	mmu-miR-99a-3p_R+2	CAAGCTCGTTTCTATGGGTCTGT	down	0.64759	-0.626847	0.0570964	77.7173	50.329	92.3352	64.1946	76.6222	43.5555	46.5375	60.894	106	57	80	42	49	58	middle
242	mmu-miR-155-5p_R+1	TTAATGCTAATTGTGATAGGGGTT	up	1.17978	0.238516	0.0573065	6860.16	8093.47	6630.71	7144.75	6805.01	8332.58	8553.39	7394.43	7612	6344	7105	8035	9006	7043	high
243	mmu-miR-193b-3p	AACTGGCCCACAAAGTCCCGCT	down	0.886425	-0.173929	0.0588517	1745.46	1547.22	1851.06	1681.45	1703.89	1447.7	1561.38	1632.59	2125	1493	1779	1396	1644	1555	middle
244	mmu-miR-30d-3p	CTTTCAGTCAGATGTTTGCTGC	down	0.748617	-0.417701	0.0598249	449.972	336.857	467.773	493.285	388.858	393.037	326.712	290.822	537	438	406	379	344	277	middle
245	bta-mir-2887-1-p5_1ss15CG	CGGTGCGGAGAGCCGTTC	down	0.228711	-2.1284	0.0607621	15.3017	3.49966	13.0663	14.6409	18.1978	0	0	10.499	15	13	19	0	0	10	middle
246	mmu-miR-466o-3p_R+1	TACATACATGCACACATAAGACA	down	-inf	-inf	0.060859	14.1578	0	9.58195	21.3982	11.4933	0	0	0	11	19	12	0	0	0	middle
247	PC-3p-3648_387	ATATTGTGGCCTACATTG	up	2.55558	1.35365	0.0610487	39.9368	102.062	43.5543	55.1848	21.0711	69.4814	134.864	101.84	50	49	22	67	142	97	middle
248	hsa-miR-1260b_R+2	ATCCCACCACTGCCACCATTT	up	4.64241	2.21487	0.0613951	1.45181	6.7399	4.35543	0	0	6.22222	6.64821	7.34928	5	0	0	6	7	7	low
249	mmu-miR-1843a-3p	TCTGATCGTTCACCTCCATACA	up	1.2807	0.356937	0.0615316	17.6807	22.6437	20.035	15.7671	17.24	24.8889	19.9446	23.0977	23	14	18	24	21	22	middle
250	mmu-miR-148a-5p	AAAGTTCTGAGACACTCCGACT	up	1.13004	0.176378	0.062516	590.525	667.318	610.632	545.091	615.851	631.555	674.318	696.082	701	484	643	609	710	663	middle
251	mmu-miR-466f_R+2_1	ACGTGTGTGTGCATGTGCATGTAT	down	0.620202	-0.68919	0.0628776	16.6942	10.3537	15.244	15.204	19.6344	8.81481	8.07282	14.1736	17.5	13.5	20.5	8.5	8.5	13.5	middle
252	mmu-miR-466f_R+2_2	ACGTGTGTGTGCATGTGCATGTGT	down	0.620202	-0.68919	0.0628776	16.6942	10.3537	15.244	15.204	19.6344	8.81481	8.07282	14.1736	17.5	13.5	20.5	8.5	8.5	13.5	middle
253	mmu-miR-701-3p_R+1	TATCTATTAAAGAGGCTAGCC	down	0.467212	-1.09785	0.0639004	19.7295	9.21785	16.5506	22.5244	20.1133	15.5555	4.74872	7.34928	19	20	21	15	5	7	middle
254	mmu-miR-1968-5p_R-1	TGCAGCTGTTAAGGATGGTGGAC	up	5.37741	2.42691	0.0643743	3.19398	17.1754	9.58195	0	0	9.33332	18.0451	24.1476	11	0	0	9	19	23	middle
255	bta-miR-2478_L-1_1ss11TC	TATCCCACTCCTGACACCA	up	4.31732	2.11014	0.064957	1.43667	6.20255	0	0	4.31	5.18518	7.12308	6.29938	0	0	4.5	5	7.5	6	low
256	mmu-miR-674-3p_R-2	CACAGCTCCCATCTCAGAAC	up	1.2015	0.264839	0.0654164	2580.18	3100.09	2648.1	2458.54	2633.89	2786.52	3273.77	3239.98	3040	2183	2750	2687	3447	3086	middle
257	mmu-miR-3535	TGGATATGATGACTGATTACCTGAGA	down	0.654496	-0.611543	0.0657211	215.05	140.75	213.416	216.235	215.5	180.444	126.316	115.489	245	192	225	174	133	110	middle
258	mdo-miR-106-5p	AAAAGTGCTTATAGTGCAGGTAG	down	0.382888	-1.38501	0.0660772	9.53103	3.64932	8.71087	11.2622	8.62	0	5.69846	5.24949	10	10	9	0	6	5	middle
259	mmu-miR-669e-3p_R+1	TGAATATACACACACTTACACA	down	0.609673	-0.713891	0.0663894	98.7687	60.2167	113.241	77.7093	105.356	62.2222	61.7334	56.6944	130	69	110	60	65	54	middle
260	mmu-miR-8114	TCACCCATCTCCTCTCCGCCT	down	0.917359	-0.124442	0.0670691	1430.6	1312.37	1504.37	1404.4	1383.03	1263.11	1344.84	1329.17	1727	1247	1444	1218	1416	1266	middle
261	mmu-miR-193a-3p	AACTGGCCTACAAAGTCCCAGT	up	1.15691	0.210276	0.067349	370.951	429.157	339.724	372.779	400.351	454.222	401.742	431.508	390	331	418	438	423	411	middle
262	mmu-miR-15b-5p	TAGCAGCACATCATGGTTTACA	down	0.755069	-0.40532	0.0676016	11401.5	8608.91	10203.9	11088.8	12911.8	8321.18	8864.91	8640.65	11714	9846	13481	8024	9334	8230	high
263	mmu-miR-186-5p_R+1	CAAAGAATTCTCCTTTTGGGCTT	down	0.86005	-0.217508	0.0678918	12229.8	10518.2	12143.8	11851.2	12694.4	10716.7	11333.3	9504.72	13941	10523	13254	10334	11933	9053	high
264	mmu-miR-574-3p	CACGCTCATGCACACACCCACA	up	1.60571	0.68321	0.0686446	2930.42	4705.4	3007.86	2877.5	2905.9	4052.74	4388.77	5674.69	3453	2555	3034	3908	4621	5405	middle
265	mmu-miR-30c-5p_R+1	TGTAAACATCCTACACTCTCAGCT	down	0.889374	-0.169138	0.0691026	69518.4	61827.8	68463	65880.2	74211.8	60978.6	65003.5	59501.3	78595	58496.7	77483.3	58800.8	68443.2	56673.5	high
266	mmu-miR-503-5p	TAGCAGCGGGAACAGTACTGCAG	up	1.08326	0.115381	0.0691857	18501.9	20042.4	19100.3	17887.8	18517.7	21001	19387.1	19739.1	21927	15883	19334	20251	20413	18801	high
267	PC-3p-24578_22	TTGCTACCAGTCATGGGGGAGA	down	-inf	-inf	0.0703325	9.0048	0	8.71087	13.5147	4.78889	0	0	0	10	12	5	0	0	0	middle
268	hsa-miR-339-5p_R-1_1ss22CT	TCCCTGTCCTCCAGGAGCTCAT	up	1.18033	0.239187	0.0704164	680.853	803.629	745.65	621.674	675.233	793.333	799.684	817.87	856	552	705	765	842	779	middle
269	mmu-miR-532-5p	CATGCCTTGAGTGTAGGACCGT	up	1.19594	0.258142	0.0706077	4336.38	5186.04	4744.81	4076.92	4187.41	4701.92	5224.54	5631.65	5447	3620	4372	4534	5501	5364	middle
270	ssc-mir-1285-p5	TCAGTAGTGGGATCGCGCCT	down	0.49323	-1.01967	0.0715787	22.6268	11.1602	20.9061	25.9031	21.0711	5.18518	10.4472	17.8483	24	23	22	5	11	17	middle
271	pal-miR-9226-5p_L-3_1ss4AT	TGTCCCTGTTCGGGCGCCA	up	1.50661	0.591303	0.0717504	194.757	293.422	203.399	193.147	187.724	252	279.7	348.566	233.5	171.5	196	243	294.5	332	middle
272	efu-miR-2683_L+1R-4_1ss11GA	TGATTGGAAGACACTCTGCAAC	down	0.567488	-0.817338	0.0719111	36.9329	20.959	36.5856	28.7186	45.4945	21.2592	18.52	23.0977	42	25.5	47.5	20.5	19.5	22	middle
273	mmu-miR-701-5p	TTAGCCGCTGAAATAGATGGA	down	0.84017	-0.251247	0.0720323	63.4973	53.3485	63.5893	60.816	66.0867	50.8148	49.3867	59.8441	73	54	69	49	52	57	middle
274	mmu-miR-219a-1-3p	AGAGTTGCGTCTGGACGTCCCG	down	0.707512	-0.499173	0.0744288	98.1307	69.4287	87.1087	92.3502	114.933	54.9629	69.3313	83.9918	100	82	120	53	73	80	middle
275	mdo-miR-26-5p_R+3	TTCAAGTAATCCAGGATAGGCTAG	down	0.611399	-0.709814	0.0745212	182.686	111.694	219.514	166.681	161.864	93.3332	156.708	85.0417	252	148	169	90	165	81	middle
276	mmu-miR-5113_L+1	GACAGAGGAGGAGAGAGATCCTGT	up	1.80671	0.853367	0.0761254	31.4375	56.7986	27.0037	33.7866	33.5222	46.6666	51.2862	72.4429	31	30	35	45	54	69	middle
277	mmu-miR-466l-3p	TATAAATACATGCACACATATT	down	0.504456	-0.987199	0.0763259	17.4145	8.78488	12.1952	18.0195	22.0289	11.4074	7.59795	7.34928	14	16	23	11	8	7	middle
278	mmu-miR-25-3p	CATTGCACTTGTCTCGGTCTGA	down	0.86538	-0.208594	0.0769502	46031	39834.3	46179.8	46524.2	45389.1	39878.2	43073.7	36551.1	53014	41310	47390	38454	45353	34814	high
279	cpo-miR-328-3p_R-2	CTGGCCCTCTCTGCCCTTCT	up	4.41856	2.14358	0.0769991	0.957778	4.232	0	0	2.87333	6.22222	3.3241	3.14969	0	0	3	6	3.5	3	low
280	PC-3p-19821_32	TCTTACATCCCTCCTCCTCCCC	down	0.245705	-2.025	0.0771418	8.546	2.09979	7.83978	10.136	7.66222	0	0	6.29938	9	9	8	0	0	6	middle
281	mmu-miR-150-3p_L+1R-2	CCTGGTACAGGCCTGGGGGAT	down	0.810635	-0.302876	0.077717	291.229	236.08	326.657	282.682	264.347	241.629	254.531	212.079	375	251	276	233	268	202	middle
282	mmu-miR-15a-3p_1ss22AT	CAGGCCATACTGTGCTGCCTCT	down	0.886728	-0.173436	0.0784841	348.691	309.194	368.47	323.226	354.378	324.592	295.37	307.62	423	287	370	313	311	293	middle
283	mmu-miR-700-3p	CACGCGGGAACCGAGTCCACC	up	1.28699	0.363996	0.0793358	1064.74	1370.31	1108.89	949.405	1135.92	1167.7	1430.31	1512.9	1273	843	1186	1126	1506	1441	middle
284	mmu-miR-186-3p_L-1R+1	CCCTAAGGTGAATTTTTTGGGA	down	0.566988	-0.818609	0.0793814	42.6017	24.1547	37.4567	40.544	49.8045	34.2222	25.6431	12.5988	43	36	52	33	27	12	middle
285	mmu-miR-423-5p	TGAGGGGCAGAGAGCGAGACTTT	up	1.27781	0.353671	0.0840602	5318.05	6795.44	5636.8	5527.49	4789.85	5810.51	7028.1	7547.71	6471	4908	5001	5603	7400	7189	high
286	mmu-miR-129-5p	CTTTTTGCGGTCTGGGCTTGC	up	1.23644	0.306188	0.0843716	129.648	160.301	139.374	141.341	108.229	152.963	155.758	172.183	160	125.5	113	147.5	164	164	middle
287	mml-miR-877-3p_L+1R+2_2	TCCTCTTCTCCCTCCTCCCAGT	up	1.3263	0.407404	0.0855528	152.755	202.598	167.684	149.787	140.793	174.222	199.446	234.127	192.5	133	147	168	210	223	middle
288	mml-miR-877-3p_L+1R+2_1	TCCTCTTCTCCCTCCTCCCAGA	up	1.3263	0.407404	0.0855528	152.755	202.598	167.684	149.787	140.793	174.222	199.446	234.127	192.5	133	147	168	210	223	middle
289	PC-5p-10073_88	AGTGAAGCCAAGGTGTGGAGC	up	1.62239	0.698125	0.086266	25.5064	41.3815	25.2615	22.5244	28.7333	31.1111	43.6882	49.3452	29	20	30	30	46	47	middle
290	rno-miR-17-5p_R+1	CAAAGTGCTTACAGTGCAGGTAGC	down	0.546194	-0.872515	0.0862789	32.4418	17.7195	26.1326	40.544	30.6489	26.9629	10.4472	15.7485	30	36	32	26	11	15	middle
291	mmu-miR-1941-5p_R-1	AGGGAGATGCTGGTACAGAGGCT	up	2.54105	1.34542	0.0873621	11.1672	28.3765	18.2928	5.63111	9.57778	16.5926	37.04	31.4969	21	5	10	16	39	30	middle
292	mmu-miR-486b-5p	TCCTGTACTGAGCTGCCCCGAG	up	1.24729	0.318796	0.0875765	152.638	190.384	157.667	140.778	159.47	163.852	204.67	202.63	181	125	166.5	158	215.5	193	middle
293	mmu-miR-466g_1ss21AT	ATACAGACACATGCACACACT	down	0.893702	-0.162134	0.0880463	1401.15	1252.21	1415.52	1324.44	1463.48	1181.18	1224.22	1351.22	1625	1176	1528	1139	1289	1287	middle
294	mmu-miR-672-3p	ACACACAGTCACTATCTTCGA	down	0.362722	-1.46306	0.0884271	20.6358	7.48505	22.6483	19.1458	20.1133	7.25925	15.1959	0	26	17	21	7	16	0	middle
295	mmu-miR-669m-3p_L+1	CATATACATCCACACAAACATAT	down	0.623643	-0.681207	0.0887704	55.3636	34.5271	55.7495	55.748	54.5933	38.3703	43.6882	21.5229	64	49.5	57	37	46	20.5	middle
296	mmu-miR-2137_L-2R-1_1ss16AG	CGGCGGGAGCCCCGGGGA	up	4.06775	2.02423	0.0891541	2.87333	11.688	0	0	8.62	14.5185	14.2462	6.29938	0	0	9	14	15	6	middle
297	mmu-miR-742-3p	GAAAGCCACCATGCTGGGTAAA	up	5.0125	2.32553	0.0893546	1.45181	7.2772	4.35543	0	0	5.18518	11.3969	5.24949	5	0	0	5	12	5	middle
298	mmu-mir-297a-2-p3	ATATACATACGCACATACCCAT	down	0.733253	-0.447616	0.0904279	191.36	140.315	200.35	167.807	205.922	103.704	157.657	159.584	230	149	215	100	166	152	middle
299	mmu-miR-3082-3p_L-2R+1	CATGGCACTCAACTCTGCAGT	up	3.76381	1.91219	0.0919225	3.04811	11.4725	4.35543	0	4.78889	6.22222	11.3969	16.7984	5	0	5	6	12	16	middle
300	mmu-miR-126a-5p	CATTATTACTTTTGGTACGCG	up	1.55725	0.639	0.0924256	127793	199006	119826	144902	118652	241940	200030	155048	137559	128662	123883	233300	210615	147679	high
301	mmu-miR-881-3p	AACTGTGTCTTTTCTGAATAGA	up	1.25875	0.331997	0.0924913	60.7943	76.5252	50.523	61.9422	69.9178	71.5555	84.5272	73.4928	58	55	73	69	89	70	middle
302	mmu-miR-99a-5p	AACCCGTAGATCCGATCTTGTG	down	0.926623	-0.109945	0.0936889	91484.6	84771.8	87610.8	90882.7	95960.2	87043.6	85772.3	81499.3	100576	80697	100190	83935	90311	77626	high
303	mmu-miR-100-5p_1ss16AT	AACCCGTAGATCCGATCTTGTG	down	0.926623	-0.109945	0.0936889	91484.6	84771.8	87610.8	90882.7	95960.2	87043.6	85772.3	81499.3	100576	80697	100190	83935	90311	77626	high
304	mmu-miR-466c-5p	TGATGTGTGTGTGCATGTACATAT	down	0.921303	-0.118252	0.0938862	772.101	711.339	756.974	804.122	755.208	695.851	683.816	754.351	869	714	788.5	671	720	718.5	middle
305	efu-miR-9226_L-4_1ss22GT	GTCCCTGTTCGGGCGCCT	up	1.25852	0.331729	0.0951728	22.1165	27.8341	26.1326	19.1458	21.0711	29.037	26.118	28.3472	30	17	22	28	27.5	27	middle
306	mmu-miR-205-5p_R+1	TCCTTCATTCCACCGGAGTCTGT	up	1.21907	0.285775	0.0952396	14696.7	17916.2	15343.3	12993.2	15753.5	15723.5	18359.5	19665.6	17614	11537	16448	15162	19331	18731	high
307	mmu-miR-29b-3p	TAGCACCATTTGAAATCAGTGTT	up	1.39198	0.477143	0.0966014	265.778	369.958	210.803	322.662	263.868	440.222	325.287	344.366	242	286.5	275.5	424.5	342.5	328	middle
308	mmu-miR-466f_1ss22TA	ACGTGTGTGTGCATGTGCATGA	down	0.268821	-1.89528	0.0977365	7.65481	2.05778	7.83978	5.068	10.0567	0	6.17334	0	9	4.5	10.5	0	6.5	0	middle
309	mmu-miR-501-3p_R+1	AATGCACCCGGGCAAGGATTTGG	up	1.10373	0.142382	0.099397	5553.22	6129.23	5853.7	5464.43	5341.53	5716.14	6418.37	6253.19	6720	4852	5577	5512	6758	5956	middle
310	mmu-miR-191-3p_L-1	CTGCACTTGGATTTCGTTCCC	down	0.589035	-0.763575	0.0998071	39.2484	23.1187	51.3941	33.7866	32.5644	26.9629	16.1456	26.2474	59	30	34	26	17	25	middle
311	mmu-miR-378a-3p_R+1	ACTGGACTTGGAGTCAGAAGGC	down	0.824982	-0.277565	0.100145	30690.1	25318.7	31768.5	27202.8	33098.9	22776.8	24431.5	28747.9	36470	24154	34558	21963.3	25724.3	27381.7	high
312	mmu-miR-467a-5p	TAAGTGCCTGCATGTATATGCG	up	1.24118	0.311717	0.100471	1358.29	1685.88	1236.03	1426.58	1412.24	1933.29	1558.48	1565.87	1418.95	1266.7	1474.5	1864.25	1640.95	1491.45	middle
313	mmu-miR-342-3p_R+1	TCTCACACAGAAATCGCACCCGTC	down	0.842235	-0.247705	0.100689	19101.2	16087.7	18797.2	18083.7	20422.7	14803.7	15100.9	18358.5	21579	16057	21323	14275	15900	17486	high
314	mmu-miR-34b-3p	AATCACTAACTCCACTGCCATC	up	1.18891	0.24964	0.102767	694.188	825.327	649.831	639.694	793.04	779.851	890.86	805.271	746	568	828	752	938	767	middle
315	mmu-miR-34c-3p	AATCACTAACCACACAGCCAGG	up	1.22157	0.288734	0.10301	352.492	430.593	344.95	338.993	373.533	380.592	429.284	481.903	396	301	390	367	452	459	middle
316	mmu-miR-675-5p_R+2	TGGTGCGGAAAGGGCCCACAGTGT	down	0.874006	-0.194285	0.103278	464.63	406.09	488.68	442.605	462.607	361.926	421.686	434.657	561	393	483	349	444	414	middle
317	mmu-mir-466k-p3	TGTGTGTGTACATGTACATGTGA	down	0.723108	-0.467718	0.103282	33.377	24.1352	31.3591	37.1653	31.6067	26.9629	17.0954	28.3472	36	33	33	26	18	27	middle
318	mmu-miR-505-3p_R+2	CGTCAACACTTGCTGGTTTTCTCT	down	0.716245	-0.481475	0.10343	110.741	79.3179	129.792	104.739	97.6933	97.4814	81.678	58.7942	149	93	102	94	86	56	middle
319	PC-3p-6225_177	TGACTTGCCTTCCACCCCAGT	up	1.71445	0.777747	0.106042	24.5616	42.1096	22.6483	14.6409	36.3956	40.4444	41.7887	44.0957	26	13	38	39	44	42	middle
320	mmu-miR-297a-5p_R+1_2	ATGTATGTGTGCATGTGCATGTT	up	1.28964	0.366973	0.107192	25.1791	32.472	28.3103	27.5924	19.6344	35.7777	32.7662	28.8722	32.5	24.5	20.5	34.5	34.5	27.5	middle
321	mmu-miR-297a-5p_R+1_1	ATGTATGTGTGCATGTGCATGTG	up	1.28964	0.366973	0.107192	25.1791	32.472	28.3103	27.5924	19.6344	35.7777	32.7662	28.8722	32.5	24.5	20.5	34.5	34.5	27.5	middle
322	mmu-miR-872-3p	TGAACTATTGCAGTAGCCTCCT	down	0.955013	-0.0664078	0.107771	1675.87	1600.48	1627.19	1711.86	1688.56	1631.26	1548.08	1622.09	1868	1520	1763	1573	1630	1545	middle
323	mmu-miR-449a-5p	TGGCAGTGTATTGTTAGCTGGT	up	1.34315	0.425617	0.108453	43.3685	58.2503	39.1989	50.68	40.2267	58.074	68.3816	48.2953	45	45	42	56	72	46	middle
324	mmu-miR-27b-5p_R+1	AGAGCTTAGCTGATTGGTGAACA	down	0.735577	-0.443051	0.108842	242.062	178.056	194.252	271.419	260.516	173.185	190.899	170.083	223	241	272	167	201	162	middle
325	mmu-miR-3057-3p	TCCCACAGGCCCAGCTCATAGC	up	3.04527	1.60657	0.110152	4.58661	13.9675	6.09761	0	7.66222	7.25925	19.9446	14.6986	7	0	8	7	21	14	middle
326	mmu-miR-671-3p	TCCGGTTCTCAGGGCTCCACC	up	1.30584	0.384974	0.110169	368.562	481.282	365.856	380.663	359.167	417.925	466.324	559.595	420	338	375	403	491	533	middle
327	mmu-miR-10b-3p_L+1R-1	ACAGATTCGATTCTAGGGGAAT	down	0.869499	-0.201744	0.11119	991.366	861.992	1020.91	891.967	1061.22	917.777	807.282	860.916	1172	792	1108	885	850	820	middle
328	mmu-miR-338-3p_R+1	TCCAGCATCAGTGATTTTGTTGA	up	1.34291	0.425358	0.112053	324.333	435.548	295.298	355.886	321.813	520.592	411.239	374.813	339	316	336	502	433	357	middle
329	mmu-miR-19b-3p	TGTGCAAATCCATGCAAAACTGA	down	0.719878	-0.474177	0.112181	4165.11	2998.37	3433.82	4729	4332.51	3848.44	2622.72	2523.95	3942	4199	4523.5	3711	2761.5	2404	middle
330	efu-miR-9226_R-1_1ss4AG	TCAGGTCCCTGTTCGGGCGCC	up	3.54408	1.82541	0.112866	1.27704	4.52592	0	0	3.83111	3.62963	5.22359	4.72454	0	0	4	3.5	5.5	4.5	low
331	mmu-miR-10a-3p_R-1	CAAATTCGTATCTAGGGGAAT	up	1.15007	0.201716	0.112887	2028.91	2333.38	2030.5	1818.85	2237.37	2453.63	2355.36	2191.14	2331	1615	2336	2366	2480	2087	middle
332	bta-miR-877_R+5	GTAGAGGAGATGGCGCAGGGGACAT	down	0.502723	-0.992163	0.113148	26.4257	13.2848	25.2615	28.1555	25.86	7.25925	9.49744	23.0977	29	25	27	7	10	22	middle
333	mmu-miR-151-5p	TCGAGGAGCTCACAGTCTAGT	up	1.07241	0.100857	0.113597	77737.1	83366.1	79750.7	73248.9	80211.7	80935.8	83514.6	85647.8	91553.2	65039.5	83747.7	78045.3	87933.8	81577.3	high
334	mmu-miR-139-5p_R+1	TCTACAGTGCACGTGTCTCCAGT	up	1.08085	0.112172	0.113906	40984.9	44298.7	41902.7	40842.4	40209.4	41978.2	46515.6	44402.3	48104	36265	41982	40479	48977	42292	high
335	PC-3p-16817_42	TGCTCTCTGCCCCTCTTAAGT	up	5.68521	2.50721	0.114571	2.03254	11.5554	6.09761	0	0	6.22222	18.9949	9.44907	7	0	0	6	20	9	middle
336	mdo-miR-26-5p_L+1R+1	TTTCAAGTAATCCAGGATAGGCT	down	0.663085	-0.592735	0.115259	29.0791	19.2819	31.3591	21.3982	34.48	23.8518	16.1456	17.8483	36	19	36	23	17	17	middle
337	mmu-miR-148b-3p	TCAGTGCATCACAGAACTTTGT	down	0.81033	-0.303418	0.115591	25439.2	20614.1	24376.9	22985.1	28955.5	20686.3	20443.2	20712.9	27984.5	20409	30232	19947.5	21525	19728.5	high
338	mmu-miR-146a-5p	TGAGAACTGAATTCCATGGGTT	down	0.910033	-0.136009	0.116529	42870.1	39013.2	40708.1	41993.4	45908.7	40742.6	38491.2	37805.7	46732.5	37287	47932.5	39287.5	40528	36009	high
339	mmu-miR-7b-5p	TGGAAGACTTGTGATTTTGTTGTT	up	2.44	1.28688	0.117468	5.77696	14.0958	8.71087	0	8.62	15.2099	18.6783	8.39918	10	0	9	14.6667	19.6667	8	middle
340	pal-miR-9993a-3p_L+1_3	TATCTCGGTGGGACCTCCA	down	0.227736	-2.13457	0.117519	5.5605	1.26633	2.17772	7.32044	7.18333	0	3.79898	0	2.5	6.5	7.5	0	4	0	low
341	pal-miR-9993a-3p_L+1_1	AATCTCGGTGGGACCTCCA	down	0.227736	-2.13457	0.117519	5.5605	1.26633	2.17772	7.32044	7.18333	0	3.79898	0	2.5	6.5	7.5	0	4	0	low
342	pal-miR-9993a-3p_L+1_2	CATCTCGGTGGGACCTCCA	down	0.227736	-2.13457	0.117519	5.5605	1.26633	2.17772	7.32044	7.18333	0	3.79898	0	2.5	6.5	7.5	0	4	0	low
343	mdo-miR-196b_R+2	TAGGTAGTTTCCTGTTGTTGGGC	up	2.40488	1.26596	0.120619	2.83798	6.82499	2.17772	3.94177	2.39444	7.77777	9.02257	3.67464	2.5	3.5	2.5	7.5	9.5	3.5	low
344	mmu-miR-1668_R+1	CAAAGGCCTCCTTCTCTGCAGT	down	0.821556	-0.283569	0.121508	23.846	19.5908	22.6483	25.9031	22.9867	17.6296	18.0451	23.0977	26	23	24	17	19	22	middle
345	mmu-miR-466f_R+1_1	ACGTGTGTGTGCATGTGCATGTA	down	0.609817	-0.713553	0.122729	32.2395	19.6602	33.9724	32.0973	30.6489	12.9629	16.6205	29.3971	39	28.5	32	12.5	17.5	28	middle
346	mmu-miR-466f_R+1_2	ACGTGTGTGTGCATGTGCATGTT	down	0.609817	-0.713553	0.122729	32.2395	19.6602	33.9724	32.0973	30.6489	12.9629	16.6205	29.3971	39	28.5	32	12.5	17.5	28	middle
347	efu-miR-2683_L+1R-5_1ss11GA	TGATTGGAAGACACTCTGCAA	up	2.20852	1.14308	0.123835	3.33847	7.37306	5.22652	0	4.78889	6.22222	8.5477	7.34928	6	0	5	6	9	7	low
348	mmu-miR-30a-3p	CTTTCAGTCGGATGTTTGCAGC	up	1.16283	0.217646	0.125864	5093.61	5923.03	4762.67	5528.62	4989.54	6365.33	6160.04	5243.71	5467.5	4909	5209.5	6138	6486	4994.5	middle
349	mmu-miR-702-5p	GTGAGTGGGGTGGTTGGCATG	down	0.642353	-0.638563	0.126256	20.1418	12.9381	18.2928	19.1458	22.9867	10.3704	18.9949	9.44907	21	17	24	10	20	9	middle
350	pal-mir-9226-p5_1ss18CA	TCCCTGTTCGGGCGCCAAT	up	1.34012	0.42236	0.126733	18.4219	24.6875	20.9061	15.204	19.1556	22.2963	21.8441	29.9221	24	13.5	20	21.5	23	28.5	middle
351	pal-mir-9226-p3_1ss18CA	TCCCTGTTCGGGCGCCAAT	up	1.34012	0.42236	0.126733	18.4219	24.6875	20.9061	15.204	19.1556	22.2963	21.8441	29.9221	24	13.5	20	21.5	23	28.5	middle
352	mmu-miR-466h-3p_R+5_2	TACGCACGCACACACACACACAGA	down	0.568752	-0.814129	0.127395	68.665	39.0533	53.1363	93.4764	59.3822	25.9259	40.839	50.3951	61	83	62	25	43	48	middle
353	mmu-miR-466h-3p_R+5_1	TACGCACGCACACACACACACAAA	down	0.568752	-0.814129	0.127395	68.665	39.0533	53.1363	93.4764	59.3822	25.9259	40.839	50.3951	61	83	62	25	43	48	middle
354	mmu-let-7d-5p	AGAGGTAGTAGGTTGCATAGTT	up	1.10899	0.149244	0.128147	40352.8	44750.7	38388.6	43075.2	39594.5	46123	46907.1	41222.1	44069.8	38247.5	41340	44475.8	49389.2	39263	high
355	mmu-miR-196b-5p	TAGGTAGTTTCCTGTTGTTGGG	up	1.24294	0.313757	0.128503	11203.4	13925.1	9946.5	12285.4	11378.2	15672.9	14358.9	11743.6	11418.5	10908.5	11879.8	15113.2	15118.7	11185.5	high
356	PC-3p-10805_80	CTTTCTCCTGCTGCCCTGCAGT	up	2.11539	1.08092	0.128662	9.1058	19.2623	13.0663	5.63111	8.62	12.4444	18.0451	27.2973	15	5	9	12	19	26	middle
357	dno-miR-24b-3p_R-1	TGGCTCAGTTCAGCAGGAACG	up	1.37367	0.458041	0.128821	5.53559	7.6041	4.35543	5.068	7.18333	8.81481	6.64821	7.34928	5	4.5	7.5	8.5	7	7	low
358	mmu-miR-669c-5p_L+1	CATAGTTGTGTGTGGATGTGTGT	up	2.20119	1.13828	0.130531	2.13368	4.69661	3.0488	0	3.35222	4.66666	5.22359	4.19959	3.5	0	3.5	4.5	5.5	4	low
359	hsa-miR-4454_L-1_1ss2GA	AATCCGAGTCACGGCACCA	up	1.26373	0.337687	0.132803	118.912	150.272	119.339	95.1657	142.23	154.518	137.238	159.059	137	84.5	148.5	149	144.5	151.5	middle
360	cja-mir-421-p5	TCCGGTGCACATTGTAGGC	up	1.84036	0.879992	0.133587	5.2444	9.65161	4.35543	5.63111	5.74667	7.25925	13.2964	8.39918	5	5	6	7	14	8	middle
361	mmu-miR-3057-5p	ATTGGAGCTGAGATTCTGCGGGAT	up	1.38268	0.467468	0.13406	9.50213	13.1384	9.58195	11.2622	7.66222	10.3704	13.2964	15.7485	11	10	8	10	14	15	middle
362	pal-mir-9226-p5_1ss18CG	TCCCTGTTCGGGCGCCAGT	up	3.30319	1.72386	0.134371	1.91556	6.32745	0	0	5.74667	5.18518	8.5477	5.24949	0	0	6	5	9	5	low
363	mmu-miR-6395_R-3_1ss18GT	CTGGCCCTCTCTGCCCTTT	up	3.33528	1.73781	0.134491	2.07519	6.92131	0	0	6.22556	4.66666	6.64821	9.44907	0	0	6.5	4.5	7	9	low
364	mmu-miR-33-5p_R-1	GTGCATTGTAGTTGCATTGC	up	1.44091	0.526982	0.134945	78.4864	113.092	62.7182	104.739	68.0022	138.963	101.623	98.6903	72	93	71	134	107	94	middle
365	mmu-miR-505-5p	GGGAGCCAGGAAGTATTGATGTT	down	0.656551	-0.607022	0.13499	39.165	25.7138	50.523	31.5342	35.4378	28	21.8441	27.2973	58	28	37	27	23	26	middle
366	mmu-miR-421-3p	ATCAACAGACATTAATTGGGCGC	down	0.958968	-0.0604455	0.135594	1600.84	1535.16	1653.32	1594.73	1554.47	1504.74	1559.48	1541.25	1898	1416	1623	1451	1642	1468	middle
367	mmu-miR-5121_L-1R-2	GCTTGTGATGAGACATCT	up	3.36752	1.75169	0.136432	3.19259	10.7511	0	0	9.57778	11.4074	11.3969	9.44907	0	0	10	11	12	9	middle
368	hsa-mir-4454-p3_1ss19AT	TCCGAGTCACGGCACCAAT	up	1.31392	0.393873	0.136853	267.692	351.725	273.086	216.798	313.193	317.852	315.79	421.534	313.5	192.5	327	306.5	332.5	401.5	middle
369	mmu-miR-297c-3p_L+1R-4	ATATACATACACACATACC	down	0.816031	-0.293304	0.137625	30.2944	24.7212	28.0925	27.5924	35.1983	26.1852	25.4056	22.5728	32.25	24.5	36.75	25.25	26.75	21.5	middle
370	mmu-miR-101c_L+2	GTACAGTACTGTGATAACTGA	up	1.40122	0.486686	0.138346	799.999	1120.98	731.422	838.66	829.915	1396.2	968.106	998.627	839.667	744.667	866.5	1346.33	1019.33	951.167	middle
371	mmu-miR-463-5p_R+1	TACCTAATTTGTTGTCCATCATG	up	2.26404	1.1789	0.138741	7.05399	15.9705	8.71087	0	12.4511	14.5185	21.8441	11.5489	10	0	13	14	23	11	middle
372	PC-5p-15515_47	AGTCTTACAGTCCTTACCA	up	5.25185	2.39282	0.139003	3.94809	20.7348	6.09761	0	5.74667	35.2592	13.2964	13.6487	7	0	6	34	14	13	middle
373	mmu-miR-187-3p_R+1	TCGTGTCTTGTGTTGCAGCCGGT	up	1.28341	0.359982	0.139263	113.183	145.26	141.116	103.612	94.82	157.629	130.115	148.036	162	92	99	152	137	141	middle
374	mmu-miR-500-5p	AATCCTTGCTATCTGGGTGCTTAGT	up	1.24364	0.314574	0.140166	29.9037	37.1896	31.3591	31.5342	26.8178	37.3333	42.7385	31.4969	36	28	28	36	45	30	middle
375	mmu-miR-194-5p	TGTAACAGCAACTCCATGTGGA	down	0.883567	-0.178589	0.140169	508.624	449.404	459.063	520.877	545.933	455.777	457.777	434.657	527	462.5	570	439.5	482	414	middle
376	ssc-miR-378_L+4	GATCACTGGACTTGGAGTCAGAAGGC	down	0.296713	-1.75286	0.140348	2.91256	0.864197	3.0488	2.81555	2.87333	2.59259	0	0	3.5	2.5	3	2.5	0	0	low
377	PC-3p-5468_213	CAGTCGGTCCTGAGAGATG	up	1.44517	0.531238	0.140945	28.8303	41.6647	34.8435	31.5342	20.1133	31.1111	45.5877	48.2953	40	28	21	30	48	46	middle
378	bta-miR-199c_L-1R+2	ACAGTAGTCTGCACATTGGCT	up	1.64162	0.715117	0.141469	7.73904	12.7045	7.83978	6.75733	8.62	14.5185	15.1959	8.39918	9	6	9	14	16	8	middle
379	mmu-miR-499-5p	TTAAGACTTGCAGTGATGTTT	up	1.27539	0.350935	0.143035	132.805	169.378	137.632	136.273	124.511	140	172.853	195.281	158	121	130	135	182	186	middle
380	mmu-miR-672-5p	TGAGGTTGGTGTACTGTGTGTGA	down	0.870274	-0.200458	0.143679	1494.53	1300.66	1514.82	1630.77	1338.02	1340.89	1290.7	1270.38	1739	1448	1397	1293	1359	1210	middle
381	mmu-miR-125b-5p	TCCCTGAGACCCTAACTTGTGA	up	1.11805	0.160989	0.143733	15649.3	17496.7	15548.9	15305.3	16093.5	16125.4	18951.7	17413.1	17850	13590	16803	15549.5	19954.5	16585.5	high
382	bta-miR-296-5p_L-1R+2_1ss12CT	AGGGCCCCCCTCAATCCTGT	up	2.42755	1.2795	0.145461	2.13368	5.1796	3.0488	0	3.35222	6.74073	6.17334	2.62474	3.5	0	3.5	6.5	6.5	2.5	low
383	dno-miR-296-5p_1ss15CT	AGGGCCCCCCTCAATCCTGT	up	2.42755	1.2795	0.145461	2.13368	5.1796	3.0488	0	3.35222	6.74073	6.17334	2.62474	3.5	0	3.5	6.5	6.5	2.5	low
384	mmu-miR-466n-3p	TATACATGAGAGCATACATAGA	down	0.804942	-0.313043	0.148383	145.186	116.866	145.471	127.263	162.822	132.741	124.416	93.4408	167	113	170	128	131	89	middle
385	chi-miR-326-5p_1ss5GA	CCTCATCTGTCTGTTGGGCT	up	1.49324	0.578442	0.148384	46.2237	69.0228	65.3315	29.2818	44.0578	64.2962	79.7785	62.9938	75	26	46	62	84	60	middle
386	mmu-miR-744-5p	TGCGGGGCTAGGGCTAACAGCA	up	1.23996	0.310291	0.150673	5410.62	6708.94	6119.38	5131.06	4981.4	5568.88	6978.72	7579.21	7025	4556	5201	5370	7348	7219	high
387	mmu-miR-362-5p	AATCCTTGGAACCTAGGTGTGAAT	down	0.901756	-0.149191	0.150675	2748.56	2478.53	2904.2	2522.74	2818.74	2445.33	2328.77	2661.49	3334	2240	2943	2358	2452	2535	middle
388	mmu-miR-8097_R+1	AACAAGGAAAATGTCCGGGCTGC	up	2.08567	1.06051	0.15237	8.24434	17.195	11.3241	0	13.4089	20.7407	16.1456	14.6986	13	0	14	20	17	14	middle
389	mmu-miR-296-5p	AGGGCCCCCCCTCAATCCTGT	up	1.27454	0.349975	0.153131	3495.49	4455.14	3323.2	3413.58	3749.7	3800.74	4270.05	5294.63	3815	3031	3915	3665	4496	5043	middle
390	dno-miR-196c-5p_R+1	TAGGTAGTTTCATGTTGTTGGCT	up	2.14524	1.10114	0.154119	5.61348	12.0423	0	10.136	6.70445	13.4815	14.2462	8.39918	0	9	7	13	15	8	middle
391	cgr-miR-1260_L-1R+2_2	TCCCACCGCTGCCACCAAG	down	0.65798	-0.603885	0.155184	12.839	8.44777	16.5506	12.3884	9.57778	8.29629	7.59795	9.44907	19	11	10	8	8	9	middle
392	cgr-miR-1260_L-1R+2_4	TCCCACCGCTGCCACCAGA	down	0.65798	-0.603885	0.155184	12.839	8.44777	16.5506	12.3884	9.57778	8.29629	7.59795	9.44907	19	11	10	8	8	9	middle
393	cgr-miR-1260_L-1R+2_1	TCCCACCGCTGCCACCAAA	down	0.65798	-0.603885	0.155184	12.839	8.44777	16.5506	12.3884	9.57778	8.29629	7.59795	9.44907	19	11	10	8	8	9	middle
394	cgr-miR-1260_L-1R+2_5	TCCCACCGCTGCCACCATA	down	0.65798	-0.603885	0.155184	12.839	8.44777	16.5506	12.3884	9.57778	8.29629	7.59795	9.44907	19	11	10	8	8	9	middle
395	cgr-miR-1260_L-1R+2_3	TCCCACCGCTGCCACCAAT	down	0.65798	-0.603885	0.155184	12.839	8.44777	16.5506	12.3884	9.57778	8.29629	7.59795	9.44907	19	11	10	8	8	9	middle
396	mmu-miR-669h-5p	ATGCATGGGTGTATAGTTGAGTGC	up	1.60359	0.681305	0.155936	21.778	34.923	24.3904	30.408	10.5356	41.4814	37.04	26.2474	28	27	11	40	39	25	middle
397	mmu-miR-7a-2-3p	CAACAAGTCCCAGTCTGCCACA	down	0.620849	-0.687685	0.157321	14.1705	8.79774	18.2928	14.6409	9.57778	8.29629	7.59795	10.499	21	13	10	8	8	10	middle
398	mmu-miR-6418-3p_1ss22GT	ACTGCAACCTCCTTTCTCCAGT	up	1.58423	0.663784	0.157743	22.8354	36.1765	19.1639	22.5244	26.8178	48.7407	30.3918	29.3971	22	20	28	47	32	28	middle
399	mmu-miR-298-5p_R-3	GGCAGAGGAGGGCTGTTCTT	up	1.15861	0.212396	0.158554	15210.8	17623.3	16331.1	14970.9	14330.3	15424.9	18154.4	19290.8	18748	13293	14962	14874	19115	18374	high
400	mmu-miR-1190_R-1	TCAGCTGAGGTTCCCCTCTGT	down	0.321644	-1.63647	0.159532	9.79249	3.14969	10.453	11.2622	7.66222	0	0	9.44907	12	10	8	0	0	9	middle
401	cgr-miR-1260_L+1	CATCCCACCGCTGCCACCA	up	1.59971	0.677813	0.159779	14.0969	22.5509	10.8886	14.6409	16.7611	15.037	23.7436	28.8722	12.5	13	17.5	14.5	25	27.5	middle
402	mmu-let-7d-3p	CTATACGACCTGCTGCCTTTCT	up	1.1443	0.194459	0.16044	5943.66	6801.31	6402.49	5810.18	5618.33	6000.29	7067.99	7335.63	7350	5159	5866	5786	7442	6987	middle
403	mmu-miR-669d-5p_L-1	CTTGTGTGTGCATGTATATGT	up	3.14849	1.65466	0.161155	1.50163	4.72785	0	4.50489	0	5.18518	4.27385	4.72454	0	4	0	5	4.5	4.5	low
404	PC-3p-5979_188	TGACCGGCCTATCCTCTCAGT	up	1.24863	0.320351	0.161479	27.616	34.4823	27.8748	28.1555	26.8178	31.1111	40.839	31.4969	32	25	28	30	43	30	middle
405	mmu-miR-101c_L+2R+1	GTACAGTACTGTGATAACTGAT	up	1.58791	0.667127	0.162619	3.69094	5.86087	2.3229	3.00326	5.74667	6.56789	5.0653	5.94942	2.66667	2.66667	6	6.33333	5.33333	5.66667	low
406	mmu-miR-16-5p	TAGCAGCACGTAAATATTGGCG	down	0.859067	-0.219157	0.163253	27319.6	23469.4	24463.6	28723.2	28772.1	26901.2	22070.1	21436.8	28084	25504	30040.5	25940.5	23238	20418	high
407	mmu-miR-6996-5p	TGCACAGGACAGAGCACAGTC	down	0.22077	-2.17939	0.163653	10.9605	2.41975	6.96869	6.75733	19.1556	7.25925	0	0	8	6	20	7	0	0	middle
408	PC-3p-20439_30	TCTCTCTGCAGTCACTGTCCAGT	down	0.48936	-1.03103	0.164797	9.47323	4.63582	10.453	11.2622	6.70445	7.25925	6.64821	0	12	10	7	7	7	0	middle
409	efu-mir-9226-p5_1ss17GA_1	TCCCTGTTCGGGCGCCAA	up	1.55034	0.632583	0.16487	7.85779	12.1822	6.53315	5.068	11.9722	11.9259	10.4472	14.1736	7.5	4.5	12.5	11.5	11	13.5	middle
410	efu-mir-9226-p5_1ss17GA_2	TCCCTGTTCGGGCGCCAAA	up	1.55034	0.632583	0.16487	7.85779	12.1822	6.53315	5.068	11.9722	11.9259	10.4472	14.1736	7.5	4.5	12.5	11.5	11	13.5	middle
411	efu-mir-9226-p3_1ss17GA	TCCCTGTTCGGGCGCCAAAT	up	1.55034	0.632583	0.16487	7.85779	12.1822	6.53315	5.068	11.9722	11.9259	10.4472	14.1736	7.5	4.5	12.5	11.5	11	13.5	middle
412	efu-mir-9226-p5_1ss17GA_3	TCCCTGTTCGGGCGCCAAAT	up	1.55034	0.632583	0.16487	7.85779	12.1822	6.53315	5.068	11.9722	11.9259	10.4472	14.1736	7.5	4.5	12.5	11.5	11	13.5	middle
413	mmu-miR-135a-5p	TATGGCTTTTTATTCCTATGTGA	down	0.756862	-0.401897	0.166539	73.4562	55.5962	57.9273	83.9035	78.5378	69.4814	47.9621	49.3452	66.5	74.5	82	67	50.5	47	middle
414	mmu-miR-3473e_R-3	GGGCTGGAGAGATGGCTC	up	1.5674	0.648371	0.167293	16.3036	25.5542	10.8886	14.0778	23.9444	18.1481	27.5426	30.972	12.5	12.5	25	17.5	29	29.5	middle
415	mmu-miR-3473b_R-2	GGGCTGGAGAGATGGCTC	up	1.5674	0.648371	0.167293	16.3036	25.5542	10.8886	14.0778	23.9444	18.1481	27.5426	30.972	12.5	12.5	25	17.5	29	29.5	middle
416	mmu-miR-30c-2-3p	CTGGGAGAAGGCTGTTTACTCT	down	0.903458	-0.146471	0.168056	649.146	586.476	634.151	654.335	658.951	543.407	644.876	571.144	728	581	688	524	679	544	middle
417	mdo-miR-130a-3p	CAGTGCAATGTAAAAAGGGCAT	up	2.16096	1.11167	0.170054	4.93477	10.6638	5.22652	0	9.57778	8.29629	14.2462	9.44907	6	0	10	8	15	9	middle
418	mmu-miR-23a-5p	GGGGTTCCTGGGGATGGGATTT	down	0.721208	-0.471512	0.170693	39.8357	28.7298	46.1676	29.2818	44.0578	23.8518	36.0903	26.2474	53	26	46	23	38	25	middle
419	pal-miR-339b-5p_R+2	TCCCTGTCCTCCAGGAGCTTT	up	2.01154	1.0083	0.177805	3.99462	8.03532	5.22652	6.75733	0	7.25925	9.49744	7.34928	6	6	0	7	10	7	low
420	mmu-mir-669f-p3	AGTTGTGTGTGCATGTGCATGTGT	down	0.905989	-0.142434	0.179109	316.058	286.345	324.915	334.488	288.77	306.963	285.398	266.674	373	297	301.5	296	300.5	254	middle
421	mmu-mir-669f-p5_2	AGTTGTGTGTGCATGTGCATGTGT	down	0.905989	-0.142434	0.179109	316.058	286.345	324.915	334.488	288.77	306.963	285.398	266.674	373	297	301.5	296	300.5	254	middle
422	mmu-miR-1947-5p_R-1	AGGACGAGCTAGCTGAGTGCT	up	1.48594	0.571374	0.179535	20.1448	29.9339	26.1326	18.0195	16.2822	31.1111	20.8944	37.7963	30	16	17	30	22	36	middle
423	mmu-miR-151-3p	CTAGACTGAGGCTCCTTGAGG	up	1.17752	0.235753	0.181134	39508.4	46522	42071.7	37229.5	39223.9	39996.4	47158.6	52410.9	48298	33057	40953	38568	49654	49920	high
424	mmu-miR-490-3p_R+1	CAACCTGGAGGACTCCATGCTGT	up	1.52725	0.610937	0.181286	6.22943	9.5139	5.22652	6.75733	6.70445	12.4444	6.64821	9.44907	6	6	7	12	7	9	middle
425	mmu-mir-6240-p3_1ss19GT	TCTGCCCAGTGCTCTGAATGTC	down	0.587155	-0.768186	0.181573	445.645	261.663	325.786	516.936	494.213	78.8147	332.41	373.763	374	459	516	76	350	356	middle
426	mmu-miR-541-5p	AAGGGATTCTGATGTTGGTCACACT	up	inf	inf	0.183519	0	4.86951	0	0	0	7.25925	0	7.34928	0	0	0	7	0	7	low
427	mmu-miR-3544-3p	ACTCCTGCATGACGCCGTTCCC	up	inf	inf	0.183519	0	3.47822	0	0	0	5.18518	0	5.24949	0	0	0	5	0	5	low
428	mmu-miR-6967-5p	CAGGGAGGGATAAAGACCAGT	up	inf	inf	0.183519	0	3.47822	0	0	0	5.18518	0	5.24949	0	0	0	5	0	5	low
429	mmu-miR-743a-5p	TATTCAGATTGGTGCCTGTCAT	down	-inf	-inf	0.18407	3.61921	0	5.22652	5.63111	0	0	0	0	6	5	0	0	0	0	low
430	mmu-miR-6959-5p_R+1	TGGGAAACCTGTGTCGGGCTGTGT	up	inf	inf	0.184189	0	3.64932	0	0	0	0	5.69846	5.24949	0	0	0	0	6	5	low
431	mmu-miR-669l-5p_1ss2GC	ACTTGTGTGTGCATGTATATGT	down	0.941765	-0.0865605	0.18422	1911.47	1800.15	1844.09	2015.94	1874.37	1876	1722.84	1801.62	2117	1790	1957	1809	1814	1716	middle
432	mmu-miR-3064-3p_L+1R-1	TTGCCACACTGCAACACCTTAC	down	-inf	-inf	0.184282	3.33847	0	5.22652	0	4.78889	0	0	0	6	0	5	0	0	0	low
433	mmu-miR-7653-3p	CCCCTACTGTTCCACCCCGCCT	down	-inf	-inf	0.184282	3.33847	0	5.22652	0	4.78889	0	0	0	6	0	5	0	0	0	low
434	mmu-miR-12189-3p_L-1	TGGCCTGTACTCTCACACT	down	-inf	-inf	0.184282	3.33847	0	5.22652	0	4.78889	0	0	0	6	0	5	0	0	0	low
435	mmu-mir-28b-p5_1ss13AG	AAGGAGCTCACAGTCTATTT	up	inf	inf	0.18429	0	1.65565	0	0	0	2.59259	2.37436	0	0	0	0	2.5	2.5	0	low
436	mmu-miR-494-3p_R+1	TGAAACATACACGGGAAACCTCT	up	inf	inf	0.18429	0	4.63582	0	0	0	7.25925	6.64821	0	0	0	0	7	7	0	low
437	mmu-miR-5122_L+1R-2	ACCGCGGGACCCGGGGCTG	up	inf	inf	0.18429	0	3.97356	0	0	0	6.22222	5.69846	0	0	0	0	6	6	0	low
438	rno-mir-3102-p3_1ss25GT	GAGCACCCCATTGGCTACCCACAGT	up	inf	inf	0.18429	0	3.3113	0	0	0	5.18518	4.74872	0	0	0	0	5	5	0	low
439	hsa-miR-4286_L+1R+2	AACCCCACTCCTGGTACCAT	up	inf	inf	0.18429	0	1.98678	0	0	0	3.11111	2.84923	0	0	0	0	3	3	0	low
440	PC-3p-33130_11	TCCCCTGTGTCTCCTTCCCAGT	up	inf	inf	0.18441	0	3.62788	0	0	0	5.18518	5.69846	0	0	0	0	5	6	0	low
441	mmu-miR-12180-3p_R+1	AGGAGCTGTGGACACTTGG	down	-inf	-inf	0.184419	4.26735	0	6.09761	0	6.70445	0	0	0	7	0	7	0	0	0	low
442	mmu-miR-101a-5p	TCAGTTATCACAGTGCTGATGC	up	inf	inf	0.184526	0	3.33274	0	0	0	0	4.74872	5.24949	0	0	0	0	5	5	low
443	mmu-miR-669f-3p_L-2R+1	TATACATACACACACACGTATT	down	-inf	-inf	0.185465	2.80826	0	3.91989	4.50489	0	0	0	0	4.5	4	0	0	0	0	low
444	mmu-mir-669f-p5_1	AGTTGTGTGTGCATGTGCATG	down	0.922373	-0.116577	0.186032	286.159	263.946	280.925	307.458	270.093	279.481	258.805	253.55	322.5	273	282	269.5	272.5	241.5	middle
445	mmu-miR-297c-3p_L+1R-1_1ss9AG	ATATACATGCACACATACCCAT	up	inf	inf	0.187045	0	3.47433	0	0	0	0	5.69846	4.72454	0	0	0	0	6	4.5	low
446	mmu-let-7a-1-3p_1ss22CT	CTATACAATCTACTGTCTTTCT	down	0.808688	-0.306345	0.187724	929.653	751.799	794.431	1024.3	970.229	901.184	753.147	601.066	912	909.5	1013	869	793	572.5	middle
447	mmu-miR-7224-3p_1ss21CT	TCCACTGAGAGGACCACCCAT	up	inf	inf	0.189088	0	7.9318	0	0	0	0	13.2964	10.499	0	0	0	0	14	10	middle
448	mmu-miR-7687-3p_1ss21AT	CCACTCAGTCGCCCCGCCACT	up	inf	inf	0.189088	0	3.9659	0	0	0	0	6.64821	5.24949	0	0	0	0	7	5	low
449	mmu-miR-702-3p_R+2	TGCCCACCCTTTACCCCGCTCCAG	up	1.22419	0.291828	0.189314	76.6665	93.8545	90.593	67.5733	71.8333	79.8518	108.271	93.4408	104	60	75	77	114	89	middle
450	mmu-miR-135b-5p	TATGGCTTTTCATTCCTATGTGA	down	0.573785	-0.801418	0.189359	16.1678	9.27684	20.9061	18.0195	9.57778	5.18518	14.2462	8.39918	24	16	10	5	15	8	middle
451	mmu-miR-30a-5p_R+2	TGTAAACATCCTCGACTGGAAGCT	down	0.938284	-0.0919027	0.189404	133765	125509	135034	125673	140587	127778	122122	126628	155018	111588	146784	123215	128584	120610	high
452	mmu-miR-669l-3p_1ss22TC	ATATACATACACACCCATATAC	down	0.736494	-0.441255	0.18948	27.5848	20.316	25.6971	29.2818	27.7756	15.5555	17.5703	27.8223	29.5	26	29	15	18.5	26.5	middle
453	PC-5p-39321_7	TTACCCACCAAACCCCAGAAGC	up	inf	inf	0.189673	0	3.94446	0	0	0	5.18518	6.64821	0	0	0	0	5	7	0	low
454	mmu-miR-379-5p	TGGTAGACTATGGAACGTAGG	up	inf	inf	0.189961	0	4.34925	0	0	0	0	5.69846	7.34928	0	0	0	0	6	7	low
455	mmu-miR-344f-5p_R+1	AGTCAGTCTCCTGGCTGGAGTCT	down	-inf	-inf	0.190085	3.32885	0	4.35543	5.63111	0	0	0	0	5	5	0	0	0	0	low
456	mmu-miR-6399	TTGCAATGATGGTATTCTGAGG	down	-inf	-inf	0.190085	8.655	0	11.3241	14.6409	0	0	0	0	13	13	0	0	0	0	middle
457	ssc-mir-4335-p5_1ss3CG	TCGAGCCCCACGTTGGGCGCCA	up	1.39942	0.48483	0.190414	13.5464	18.9572	17.8573	14.6409	8.14111	19.7037	20.8944	16.2734	20.5	13	8.5	19	22	15.5	middle
458	hsa-miR-151b_R+4	TCGAGGAGCTCACAGTCTAGTT	up	1.18547	0.245453	0.190973	256.972	304.632	273.521	222.992	274.403	285.703	275.426	352.765	314	198	286.5	275.5	290	336	middle
459	mmu-miR-466f-3p_L-1R+3_1	ATACACACACACATACACACGCC	down	-inf	-inf	0.191138	1.68368	0	2.17772	0	2.87333	0	0	0	2.5	0	3	0	0	0	low
460	mmu-miR-466f-3p_L-1R+3_2	ATACACACACACATACACACGCG	down	-inf	-inf	0.191138	1.68368	0	2.17772	0	2.87333	0	0	0	2.5	0	3	0	0	0	low
461	mmu-miR-466f-3p_L-1R+3_3	ATACACACACACATACACACTCG	down	-inf	-inf	0.191138	1.68368	0	2.17772	0	2.87333	0	0	0	2.5	0	3	0	0	0	low
462	mmu-miR-297c-3p_L+1R-1	ATATACATACACACATACCCAT	down	0.879061	-0.185965	0.191491	583.402	512.846	576.659	523.693	649.852	467.185	543.254	528.098	662	465	678.5	450.5	572	503	middle
463	pal-miR-9995-3p_L+1_3	GATCTCGGTGGAACCTCCA	up	1.32099	0.40162	0.192729	6.86947	9.0745	9.14641	6.19422	5.26778	9.85184	9.49744	7.87423	10.5	5.5	5.5	9.5	10	7.5	low
464	pal-miR-9995-3p_L+1_1	AATCTCGGTGGAACCTCCA	up	1.32099	0.40162	0.192729	6.86947	9.0745	9.14641	6.19422	5.26778	9.85184	9.49744	7.87423	10.5	5.5	5.5	9.5	10	7.5	low
465	pal-miR-9995-3p_L+1_2	CATCTCGGTGGAACCTCCA	up	1.32099	0.40162	0.192729	6.86947	9.0745	9.14641	6.19422	5.26778	9.85184	9.49744	7.87423	10.5	5.5	5.5	9.5	10	7.5	low
466	pal-miR-9995-3p_L+1_4	TATCTCGGTGGAACCTCCA	up	1.32099	0.40162	0.192729	6.86947	9.0745	9.14641	6.19422	5.26778	9.85184	9.49744	7.87423	10.5	5.5	5.5	9.5	10	7.5	low
467	mmu-miR-677-3p_L-5	CAGATGCCGTTCCTGAGAAGG	up	1.79074	0.840559	0.192898	19.7628	35.3901	33.1013	21.3982	4.78889	33.1852	44.638	28.3472	38	19	5	32	47	27	middle
468	mmu-miR-378d_1ss6CA	ACTGGACTTGGAGTCAGAAGGT	up	1.18506	0.244962	0.193644	301.457	357.245	306.622	256.778	340.969	337.037	325.762	408.935	352	228	356	325	343	389.5	middle
469	PC-3p-21638_27	ACTGTGCCTCTCTGTTTTCAGT	down	0.327167	-1.6119	0.194086	11.6117	3.79898	12.1952	16.8933	5.74667	0	11.3969	0	14	15	6	0	12	0	middle
470	mmu-miR-3091-3p	CGGGCCTGACCAGTCTCAAGAC	down	-inf	-inf	0.195116	3.84874	0	0	6.75733	4.78889	0	0	0	0	6	5	0	0	0	low
471	cgr-miR-16-5p_L+4	GATCTAGCAGCACGTAAATATTGGCG	down	0.529054	-0.918513	0.19575	25.7216	13.6081	13.0663	31.5342	32.5644	21.7778	8.5477	10.499	15	28	34	21	9	10	middle
472	mmu-mir-344g-p3	CTCTAGCCAGGGGCTTGACTGC	down	-inf	-inf	0.197704	8.5925	0	10.453	0	15.3244	0	0	0	12	0	16	0	0	0	middle
473	bta-miR-2478_L-1	TATCCCACTTCTGACACCA	up	1.53392	0.617223	0.198145	6.43076	9.86427	5.66206	7.88355	5.74667	6.22222	12.3467	11.0239	6.5	7	6	6	13	10.5	middle
474	pal-miR-9226-5p_L-4	GTCCCTGTTCGGGCGCCA	down	0.908718	-0.138096	0.200448	475.553	432.144	520.474	465.129	441.057	442.814	432.608	421.009	597.5	413	460.5	427	455.5	401	middle
475	PC-3p-31989_12	AATGGGCCTACAATCTAAGTGT	up	inf	inf	0.200784	0	4.00266	0	0	0	7.25925	4.74872	0	0	0	0	7	5	0	low
476	PC-3p-32609_12	TCGCTCCCGGGTTTCGGCACCA	down	-inf	-inf	0.201319	3.68663	0	4.35543	0	6.70445	0	0	0	5	0	7	0	0	0	low
477	mmu-miR-195a-3p_R+1	CCAATATTGGCTGTGCTGCTCCA	down	0.721997	-0.469936	0.201416	108.236	78.1457	122.823	75.4568	126.427	70.5184	88.3262	75.5926	141	67	132	68	93	72	middle
478	mmu-miR-463-3p_R+1	TGATAGACACCATATAAGGTAGA	up	1.73736	0.796898	0.203534	6.20053	10.7726	6.09761	6.75733	5.74667	6.22222	11.3969	14.6986	7	6	6	6	12	14	middle
479	mmu-miR-342-5p_R+1	AGGGGTGCTATCTGTGATTGAGG	down	0.801423	-0.319364	0.204067	179.717	144.029	213.416	154.292	171.442	116.148	170.004	145.936	245	137	179	112	179	139	middle
480	mmu-miR-10a-5p_R-1	TACCCTGTAGATCCGAATTTGT	up	1.17477	0.232379	0.204711	103112	121133	94377	104171	110788	135559	125776	102064	108344	92496	115672	130718	132431	97213.5	high
481	mmu-miR-449c-5p_R+4	AGGCAGTGCATTGCTAGCTGGCTGT	up	2.43502	1.28393	0.204933	5.65174	13.7621	11.3241	5.63111	0	20.7407	14.2462	6.29938	13	5	0	20	15	6	middle
482	PC-3p-6001_187	TCCTCTTCCGCTCTCCGAAGC	up	1.37412	0.458507	0.20625	54.7058	75.1723	55.7495	58.5635	49.8045	55.9999	94.9744	74.5427	64	52	52	54	100	71	middle
483	PC-3p-36431_9	TGTCCGGGGGACCGACTTTGCC	up	inf	inf	0.206377	0	5.0106	0	0	0	9.33332	5.69846	0	0	0	0	9	6	0	low
484	mmu-mir-3963-p5_1ss17TC	ATCCCACTTCTGACACCG	down	-inf	-inf	0.206812	4.22415	0	0	7.88355	4.78889	0	0	0	0	7	5	0	0	0	low
485	mmu-miR-6992-5p	TGCCTGTGATGGTTTGGCTGAGT	down	-inf	-inf	0.206812	4.22415	0	0	7.88355	4.78889	0	0	0	0	7	5	0	0	0	low
486	mmu-miR-21a-5p_R+1	TAGCTTATCAGACTGATGTTGAC	up	1.19794	0.260557	0.206963	450480	539649	402930	492788	455723	634351	516006	468590	462560	437559	475813	611696	543311	446320	high
487	mmu-miR-5132-3p_R+1	CTGATGTTCCCCATCCCGCAGT	up	inf	inf	0.207451	0	5.58219	0	0	0	0	10.4472	6.29938	0	0	0	0	11	6	middle
488	mmu-let-7i-5p	TGAGGTAGTAGTTTGTGCTGTT	down	0.871404	-0.198587	0.2085	38799.9	33810.4	37248.5	43121.9	36029.2	38316.9	33416.7	29697.4	42761	38289	37617.5	36948.5	35185	28286	high
489	mmu-mir-1983-p5_1ss1GA	AAAAGCATGCTCCAGTGGCGC	down	0.732103	-0.449881	0.211089	31.6299	23.1563	34.8435	23.6506	36.3956	25.9259	15.1959	28.3472	40	21	38	25	16	27	middle
490	mmu-miR-501-5p_R-1	AATCCTTTGTCCCTGGGTGAA	up	1.13806	0.186575	0.211445	961.868	1094.66	1075.79	868.317	941.496	966.518	1181.48	1135.99	1235	771	983	932	1244	1082	middle
491	mmu-miR-669o-3p	ACATAACATACACACACACGTAT	down	0.924648	-0.113024	0.212292	9462.64	8749.61	9508.78	9239.33	9639.8	8100.03	8664.2	9484.6	10916	8203.83	10064.8	7810.75	9122.67	9033.83	high
492	PC-5p-31130_13	TCAATCTGTGAAGCTCAGTGGA	down	-inf	-inf	0.212762	4.00589	0	4.35543	0	7.66222	0	0	0	5	0	8	0	0	0	low
493	mmu-miR-219c-5p	GGACGTCCAGACGCAACTCTCG	up	2.44007	1.28692	0.212918	3.90957	9.53963	6.09761	5.63111	0	6.22222	6.64821	15.7485	7	5	0	6	7	15	middle
494	mmu-miR-324-5p	CGCATCCCCTAGGGCATTGGTGT	up	1.0994	0.136714	0.215004	2473.46	2719.31	2577.55	2281.72	2561.1	2511.7	2679.23	2967.01	2959	2026	2674	2422	2821	2826	middle
495	PC-3p-14439_53	GTTCTTAGTTGGTGGAGC	down	0.172554	-2.53488	0.215504	19.3141	3.33274	10.453	10.136	37.3533	0	4.74872	5.24949	12	9	39	0	5	5	middle
496	mmu-miR-196a-2-3p_R+2	TCGGCAACAAGAAACTGCCTGAGT	down	0.500446	-0.998714	0.215668	15.417	7.71537	20.9061	15.7671	9.57778	0	9.49744	13.6487	24	14	10	0	10	13	middle
497	PC-3p-14056_55	TCCGGGTGCCCCCTCCAAAG	down	0.71402	-0.485963	0.217007	10.4951	7.49374	13.0663	7.88355	10.5356	9.33332	4.74872	8.39918	15	7	11	9	5	8	middle
498	mmu-miR-3085-3p_R+1	TCTGGCTGCTATGGCCCCCTCT	up	1.40922	0.494902	0.220041	17.7385	24.9975	18.2928	15.7671	19.1556	19.7037	33.241	22.0478	21	14	20	19	35	21	middle
499	mmu-miR-195a-5p_R+1	TAGCAGCACAGAAATATTGGCA	down	0.842887	-0.246589	0.220643	2696.7	2273.01	2227.37	2857.22	3005.51	2573.92	2156.87	2088.25	2557	2537	3138	2482	2271	1989	middle
500	mmu-miR-351-5p_R-1	TCCCTGAGGAGCCCTTTGAGCCT	up	1.11451	0.156407	0.221917	24818.8	27660.8	26576.9	23772.3	24107.3	24452.3	28700.3	29829.7	30510	21108	25170	23579	30219	28412	high
501	ptr-miR-877_R+3	GTAGAGGAGATGGCGCAGGGGAAAT	down	0.283528	-1.81844	0.223632	15.0286	4.26104	27.0037	5.63111	12.4511	5.18518	7.59795	0	31	5	13	5	8	0	middle
502	mmu-miR-466c-5p_L-1	GATGTGTGTGTGCATGTACATAT	down	0.95952	-0.0596157	0.224238	334.634	321.088	319.689	341.808	342.406	323.555	310.566	329.143	367	303.5	357.5	312	327	313.5	middle
503	mmu-miR-6516-5p_R+2	TTTGCAGTAACAGGTGTGGACATC	up	2.57233	1.36308	0.226776	5.65174	14.5382	11.3241	5.63111	0	6.22222	23.7436	13.6487	13	5	0	6	25	13	middle
504	mmu-miR-669i_R+1	TGCATATACACACATGCATACA	down	0.512877	-0.963314	0.227154	27.9625	14.3413	32.2302	12.3884	39.2689	17.6296	18.0451	7.34928	37	11	41	17	19	7	middle
505	mmu-miR-7689-3p	TTAGAGCCAGACTGCCTGGGTTT	up	1.2831	0.359635	0.227671	19.8129	25.4219	17.4217	24.7769	17.24	25.9259	30.3918	19.948	20	22	18	25	32	19	middle
506	mmu-miR-24-3p_R+1	TGGCTCAGTTCAGCAGGAACAGT	up	1.05309	0.0746327	0.228943	28642.6	30163.4	28206.7	27400.4	30320.9	31080	29110.6	30299.5	32381	24329.5	31657.5	29970	30651	28859.5	high
507	mmu-miR-3066-5p_R+1	TTGGTTGCTGTAGATTAAGTAGT	up	1.30719	0.386472	0.235014	11.8509	15.4914	7.83978	12.3884	15.3244	17.6296	15.1959	13.6487	9	11	16	17	16	13	middle
508	mmu-miR-365-2-5p_L+1R-1	GAGGGACTTTCAGGGGCAGCTGT	down	0.748271	-0.418367	0.238829	60.1525	45.0104	54.0074	64.1946	62.2556	32.1481	39.8892	62.9938	62	57	65	31	42	60	middle
509	mmu-miR-181a-2-3p	ACCACCGACCGTTGACTGTACC	down	0.755207	-0.405055	0.238885	145.902	110.186	189.026	119.379	129.3	112	117.768	100.79	217	106	135	108	124	96	middle
510	mmu-miR-3088-3p	TTCATGAGCAGCTGCAAAGGTGT	down	0.792092	-0.33626	0.239404	54.3194	43.026	48.7808	46.1751	68.0022	40.4444	45.5877	43.0458	56	41	71	39	48	41	middle
511	mmu-miR-219b-3p	AGAATTGCGTTTGGACAATCAGT	up	inf	inf	0.243644	0	5.89797	0	0	0	12.4444	0	5.24949	0	0	0	12	0	5	middle
512	mmu-miR-466e-5p_L+1R+1	TGATGTGTGTGTACATGTACATAT	down	0.851333	-0.232204	0.243858	23.8018	20.2633	24.826	26.4662	20.1133	18.1481	23.7436	18.8981	28.5	23.5	21	17.5	25	18	middle
513	mmu-miR-7039-5p_L+1R-1	TAGAGGGATGGAGAGCATCGCG	up	inf	inf	0.244134	0	5.84395	0	0	0	5.18518	12.3467	0	0	0	0	5	13	0	middle
514	cja-miR-9933_L-4	ATCACCCATGACTGATGGCT	up	1.33365	0.415377	0.244927	21.6816	28.9157	29.6169	19.1458	16.2822	25.4074	25.6431	35.6965	34	17	17	24.5	27	34	middle
515	mmu-miR-450a-2-3p	ATTGGGGATGCTTTGCATTCAT	up	1.10458	0.143494	0.2463	286.514	316.477	284.845	269.167	305.531	352.592	303.918	292.921	327	239	319	340	320	279	middle
516	mmu-miR-127-3p	TCGGATCCGTCTGAGCTTGGCT	up	inf	inf	0.246365	0	5.92798	0	0	0	5.18518	0	12.5988	0	0	0	5	0	12	middle
517	mmu-miR-301b-3p	CAGTGCAATGGTATTGTCAAAGC	up	2.73112	1.44949	0.246531	3.00326	8.20225	0	9.00977	0	7.25925	4.74872	12.5988	0	8	0	7	5	12	middle
518	mmu-miR-22-5p	AGTTCTTCAGTGGCAAGCTTTA	up	1.20238	0.265898	0.248211	899.301	1081.31	790.076	1011.35	896.48	1297.33	1024.77	921.81	907	898	936	1251	1079	878	middle
519	mmu-miR-3109-3p	TAGGGCCATCTCATCCAGATA	up	2.33354	1.22252	0.248861	7.82877	18.2688	13.0663	5.63111	4.78889	31.1111	14.2462	9.44907	15	5	5	30	15	9	middle
520	mmu-let-7f-2-3p_R+1	CTATACAGTCTACTGTCTTTCT	down	0.671422	-0.574709	0.249436	37.16	24.95	32.2302	39.9809	39.2689	39.4074	22.319	13.1237	37	35.5	41	38	23.5	12.5	middle
521	mmu-miR-467d-5p_L+1R-1	ATAAGTGCGCGCATGTATATGC	up	1.11562	0.157849	0.249691	1033.49	1152.98	902.446	1049.64	1148.38	1247.55	1132.09	1079.29	1036	932	1199	1203	1192	1028	middle
522	mmu-miR-1964-3p_1ss11GT	CCGACTTCTGTGCTCCGGCTTT	up	4.79146	2.26047	0.250711	1.5963	7.6486	0	0	4.78889	0	11.3969	11.5489	0	0	5	0	12	11	middle
523	mmu-miR-297c-3p_R+1_2	TATACATACACACATACCCATAT	down	0.812998	-0.298676	0.254274	74.8977	60.8917	58.3628	81.0879	85.2422	55.9999	73.1303	53.5448	67	72	89	54	77	51	middle
524	mmu-miR-297c-3p_R+1_1	TATACATACACACATACCCATAC	down	0.812998	-0.298676	0.254274	74.8977	60.8917	58.3628	81.0879	85.2422	55.9999	73.1303	53.5448	67	72	89	54	77	51	middle
525	sha-mir-24-1-p5_1ss1GT	TGATTGGACCCGCCCTCCG	down	0.561771	-0.831945	0.257348	7.07327	3.97356	6.96869	5.63111	8.62	6.22222	5.69846	0	8	5	9	6	6	0	low
526	bta-miR-2478_L-1_1ss2TC	CATCCCACTTCTGACACCA	up	1.3074	0.386704	0.262542	5.80834	7.59384	3.48435	6.75733	7.18333	7.25925	7.12308	8.39918	4	6	7.5	7	7.5	8	low
527	bta-miR-2478_L-2R+1	ATCCCACTTCTGACACCAA	up	1.24248	0.313218	0.262984	15.0802	18.7368	13.5018	16.8933	14.8456	14.5185	22.7939	18.8981	15.5	15	15.5	14	24	18	middle
528	mmu-mir-1934-p3_1ss8TA	GGGCTGGAGAGATGGCTCAGC	up	1.21472	0.280625	0.263338	7.32992	8.90381	8.27532	8.44666	5.26778	8.81481	9.49744	8.39918	9.5	7.5	5.5	8.5	10	8	low
529	mmu-mir-3473f-p3_1ss3AG	GGGCTGGAGAGATGGCTCAGC	up	1.21472	0.280625	0.263338	7.32992	8.90381	8.27532	8.44666	5.26778	8.81481	9.49744	8.39918	9.5	7.5	5.5	8.5	10	8	low
530	chi-let-7a-5p_R+2	TGAGGTAGTAGGTTGTATAGTTAG	down	0.637353	-0.649835	0.263813	14.9567	9.53268	14.3729	21.3982	9.09889	9.85184	11.3969	7.34928	16.5	19	9.5	9.5	12	7	middle
531	mmu-miR-1983	CTCACCTGGAGCATGTTTTCT	down	0.891581	-0.165563	0.264791	163.241	145.543	169.862	179.069	140.793	149.333	152.909	134.387	195	159	147	144	161	128	middle
532	mmu-mir-669j-p5_1ss2GT	TTTGCATGTGTGTATAGTTGTGT	up	1.41492	0.500724	0.265667	3.86553	5.46943	2.61326	5.63111	3.35222	5.48148	4.00249	6.92432	3	5	3.5	5.28571	4.21429	6.59524	low
533	mmu-miR-669k-5p_R-2_1ss2GT	TTTGCATGTGTGTATAGTTGTGT	up	1.41492	0.500724	0.265667	3.86553	5.46943	2.61326	5.63111	3.35222	5.48148	4.00249	6.92432	3	5	3.5	5.28571	4.21429	6.59524	low
534	mmu-miR-3058-5p_R-1	TCAGCCACGGCTTACCTGGAAG	down	0.198288	-2.33433	0.265827	7.98287	1.58291	9.58195	0	14.3667	0	4.74872	0	11	0	15	0	5	0	middle
535	mmu-miR-3098-5p	TCCTAACAGCAGGAGTAGGAGC	down	0.695043	-0.524826	0.266303	51.7221	35.9491	46.1676	37.1653	71.8333	35.2592	28.4923	44.0957	53	33	75	34	30	42	middle
536	mmu-miR-466i-3p_R-1	ATACACACACACATACACACT	down	0.889245	-0.169347	0.267093	1020.62	907.579	1033.98	930.259	1097.61	883.555	798.735	1040.45	1187	826	1146	852	841	991	middle
537	mmu-miR-29c-5p_L-2R+3	ACCGATTTCTCCTGGTGTTCAGA	down	0.925508	-0.111682	0.269717	380.868	352.497	381.536	381.789	379.28	370.222	372.3	314.969	438	339	396	357	392	300	middle
538	mmu-miR-350-5p_R+3	AAAGTGCATGCGCTTTGGGACA	up	1.09442	0.130163	0.270531	478.077	523.216	435.543	536.081	462.607	528.888	514.761	525.998	500	476	483	510	542	501	middle
539	PC-3p-22152_26	CCCAGAAAAGGTGTTGGT	down	0.175122	-2.51357	0.270624	25.8325	4.52383	6.96869	16.8933	53.6356	6.22222	0	7.34928	8	15	56	6	0	7	middle
540	mmu-miR-129-2-3p	AAGCCCTTACCCCAAAAAGCAT	up	1.10998	0.150534	0.276368	575.13	638.383	561.851	591.266	572.272	555.851	699.961	659.335	645	525	597.5	536	737	628	middle
541	mmu-miR-467c-3p	ATATACATACACACACCTATAC	down	0.767021	-0.382661	0.276944	96.6759	74.1525	117.945	69.6005	102.482	89.5999	54.3254	78.5323	135.4	61.8	107	86.4	57.2	74.8	middle
542	mmu-miR-429-3p	TAATACTGTCTGGTAATGCCGT	down	0.829058	-0.270456	0.278412	35.4577	29.3965	34.8435	42.7964	28.7333	28	26.5928	33.5967	40	38	30	27	28	32	middle
543	mmu-miR-669f-3p	CATATACATACACACACACGTAT	down	0.884407	-0.177217	0.27859	255.115	225.626	269.601	256.778	238.966	203.259	207.994	265.624	309.5	228	249.5	196	219	253	middle
544	PC-3p-27462_17	TCCAACTTGGCCCCTTCCAGT	down	0.207122	-2.27145	0.279567	8.44829	1.74983	0	15.7671	9.57778	0	0	5.24949	0	14	10	0	0	5	middle
545	mmu-miR-34c-5p	AGGCAGTGTAGTTAGCTGATTGC	up	1.07947	0.110319	0.281826	3913.44	4224.42	3879.82	4060.03	3800.46	4652.14	3983.23	4037.9	4454	3605	3968	4486	4194	3846	middle
546	mmu-miR-3086-5p_R+5	TAGATTGTAGGCCCATTGGAAGGGT	down	0.61235	-0.707571	0.282347	22.1823	13.5833	23.5193	31.5342	11.4933	19.7037	9.49744	11.5489	27	28	12	19	10	11	middle
547	mmu-miR-592-5p_L-1	TTGTGTCAATATGCGATGATGT	up	1.28594	0.362821	0.283131	6.7829	8.72239	6.09761	5.63111	8.62	10.3704	9.49744	6.29938	7	5	9	10	10	6	middle
548	mmu-miR-466f-3p_L-1R+5_2	ATACACACACACATACACACTCATT	down	0.237791	-2.07224	0.28384	3.67934	0.874914	6.53315	4.50489	0	0	0	2.62474	7.5	4	0	0	0	2.5	low
549	mmu-miR-466f-3p_L-1R+5_1	ATACACACACACATACACACTCAAG	down	0.237791	-2.07224	0.28384	3.67934	0.874914	6.53315	4.50489	0	0	0	2.62474	7.5	4	0	0	0	2.5	low
550	PC-3p-17139_41	TCTCGGTGGAACCTCCAAT	up	1.46842	0.554268	0.285282	5.50587	8.08494	6.09761	5.63111	4.78889	11.4074	7.59795	5.24949	7	5	5	11	8	5	middle
551	mmu-miR-149-5p	TCTGGCTCCGTGTCTTCACTCCC	up	1.13173	0.178524	0.286108	116.363	131.691	109.757	108.117	131.216	114.074	132.964	148.036	126	96	137	110	140	141	middle
552	mmu-miR-3060-3p_L-2R+2	ATAGCACAGAAGCACTCCCACT	down	0.760695	-0.39461	0.287773	107.037	81.4223	136.761	99.1075	85.2422	60.1481	75.9795	108.139	157	88	89	58	80	103	middle
553	mmu-miR-466q_L+1	TGTGCACACACACACATACGT	down	0.868122	-0.20403	0.288885	32.4369	28.1592	34.8435	27.0293	35.4378	24.8889	32.2913	27.2973	40	24	37	24	34	26	middle
554	mmu-miR-877-3p_R+1	TGTCCTCTTCTCCCTCCTCCCAT	down	0.87424	-0.193898	0.29047	273.005	238.672	273.521	310.837	234.656	231.259	271.627	213.129	314	276	245	223	286	203	middle
555	mmu-miR-465b-5p	TATTTAGAATGGTGCTGATCTG	up	1.16074	0.21504	0.29245	77.3392	89.7704	69.6869	79.9617	82.3689	92.2962	103.522	73.4928	80	71	86	89	109	70	middle
556	mmu-miR-203-3p	GTGAAATGTTTAGGACCACTAG	down	0.896085	-0.158293	0.292725	932.721	835.797	932.934	912.239	952.989	957.184	831.026	719.18	1071	810	995	923	875	685	middle
557	mmu-miR-184-3p	TGGACGGAGAACTGATAAGGGT	up	1.06452	0.0902011	0.293045	3109.41	3310.02	2993.92	3166.93	3167.37	3111.11	3585.28	3233.68	3437	2812	3307	3000	3775	3080	middle
558	mmu-miR-743b-3p	GAAAGACATCATGCTGAATAGA	up	1.33314	0.414826	0.296951	42.3818	56.5008	43.5543	33.7866	49.8045	70.5184	37.04	61.9439	50	30	52	68	39	59	middle
559	mmu-miR-96-5p	TTTGGCACTAGCACATTTTTGCT	up	1.12926	0.175377	0.302408	9689.91	10942.4	8871.15	9791.37	10407.2	12620.7	9545.88	10660.7	10184	8694	10866	12170	10051	10154	high
560	PC-5p-27955_17	AGGAAGCCAGATACCCGT	down	0.270078	-1.88855	0.302725	7.0331	1.89949	8.71087	12.3884	0	0	5.69846	0	10	11	0	0	6	0	middle
561	mmu-miR-218-5p_R+1	TTGTGCTTGATCTAACCATGTG	down	0.900183	-0.151711	0.303395	5243.05	4719.7	4956.48	5434.02	5338.65	5456.36	4523.63	4179.12	5690	4825	5574	5261.5	4763	3980.5	middle
562	mmu-miR-297a-5p_R+2_2	ATGTATGTGTGCATGTGCATGTGA	down	0.851838	-0.231349	0.30357	17.1417	14.6019	18.7284	16.8933	15.8033	17.1111	15.6708	11.0239	21.5	15	16.5	16.5	16.5	10.5	middle
563	mmu-miR-297a-5p_R+2_3	ATGTATGTGTGCATGTGCATGTGT	down	0.851838	-0.231349	0.30357	17.1417	14.6019	18.7284	16.8933	15.8033	17.1111	15.6708	11.0239	21.5	15	16.5	16.5	16.5	10.5	middle
564	mmu-miR-297a-5p_R+2_1	ATGTATGTGTGCATGTGCATGTAG	down	0.851838	-0.231349	0.30357	17.1417	14.6019	18.7284	16.8933	15.8033	17.1111	15.6708	11.0239	21.5	15	16.5	16.5	16.5	10.5	middle
565	hsa-miR-297_R+3_2	ATGTATGTGTGCATGTGCATGTAG	down	0.851838	-0.231349	0.30357	17.1417	14.6019	18.7284	16.8933	15.8033	17.1111	15.6708	11.0239	21.5	15	16.5	16.5	16.5	10.5	middle
566	mmu-miR-125b-1-3p	ACGGGTTAGGCTCTTGGGAGCT	down	0.927855	-0.108028	0.30493	694.284	644.195	682.932	689.247	710.671	573.481	661.972	697.132	784	612	742	553	697	664	middle
567	mmu-miR-224-3p	AAATGGTGCCCTAGTGACTACA	up	1.69478	0.761098	0.305719	3.79259	6.42761	0	5.63111	5.74667	5.18518	5.69846	8.39918	0	5	6	5	6	8	low
568	efu-mir-9277-p5_1ss12AT	TGGTTAAGGCGTTGGACT	down	0.27129	-1.88209	0.309007	5.83475	1.58291	6.96869	0	10.5356	0	4.74872	0	8	0	11	0	5	0	middle
569	mmu-miR-1198-5p	TATGTGTTCCTGGCTGGCTTGG	up	1.1217	0.165682	0.309994	1002.24	1124.21	1078.41	956.162	972.145	958.221	1267.91	1146.49	1238	849	1015	924	1335	1092	middle
570	pal-miR-9993b-3p_1ss1AC	CTCTCGCTGGGGCCTCCA	down	0.306329	-1.70684	0.314708	5.16733	1.58291	7.83978	0	7.66222	0	4.74872	0	9	0	8	0	5	0	low
571	mmu-miR-26a-5p	TTCAAGTAATCCAGGATAGGCT	down	0.948783	-0.0758499	0.315645	54337.9	51554.9	52184.5	52426	58403.2	53437.1	51778.8	49448.8	59907.3	46550.3	60977.8	51528.7	54518.7	47098.7	high
572	mmu-miR-466m-3p_R-2	TACATACACACATACACACG	down	0.917186	-0.124714	0.315722	184.624	169.334	163.764	200.467	189.64	162.815	161.456	183.732	188	178	198	157	170	175	middle
573	mmu-miR-103-3p	AGCAGCATTGTACAGGGCTATGA	up	1.06903	0.0963034	0.318755	23588.8	25217.1	25921.4	22009.6	22835.3	24012.7	25163.3	26475.3	29757.5	19542.8	23842	23155.2	26494.8	25217	high
574	mdo-miR-186-5p_R+2_2	CAAAGAATTCTCCTTTTGGGCTTTT	down	0.875096	-0.192487	0.319435	188.532	164.984	222.127	176.817	166.653	158.667	186.15	150.135	255	157	174	153	196	143	middle
575	mdo-miR-186-5p_R+2_1	CAAAGAATTCTCCTTTTGGGCTTAT	down	0.875096	-0.192487	0.319435	188.532	164.984	222.127	176.817	166.653	158.667	186.15	150.135	255	157	174	153	196	143	middle
576	mmu-miR-222-3p	AGCTACATCTGGCTACTGGGTCT	down	0.963431	-0.0537472	0.320217	2102.59	2025.7	2108.03	2189.37	2010.38	1957.92	2106.53	2012.65	2420	1944	2099	1888	2218	1917	middle
577	cgr-miR-2424_L-7	TTTGGTAATCTGATGGCT	up	1.40714	0.492765	0.320245	18.4428	25.9516	19.1639	11.2622	24.9022	18.6666	36.0903	23.0977	22	10	26	18	38	22	middle
578	mdo-miR-152-3p_R+3	TCAGTGCATGACAGAACTTGGGTTT	up	1.95262	0.965409	0.320977	5.89254	11.5059	5.22652	0	12.4511	6.22222	10.4472	17.8483	6	0	13	6	11	17	middle
579	mmu-miR-297b-5p_R-1	ATGTATGTGTGCATGAACATG	down	0.267869	-1.9004	0.323857	3.22619	0.864197	3.48435	6.19422	0	2.59259	0	0	4	5.5	0	2.5	0	0	low
580	mmu-miR-744-3p_R-1	CTGTTGCCACTAACCTCAACC	down	0.846005	-0.241261	0.323987	104.998	88.8292	107.144	83.3404	124.511	90.2221	100.673	75.5926	123	74	130	87	106	72	middle
581	mmu-miR-344d-3p	GATATAACCACTGCCAGACTGA	up	1.42952	0.515528	0.325479	9.82607	14.0465	15.6796	9.00977	4.78889	11.0617	13.9296	17.1483	18	8	5	10.6667	14.6667	16.3333	middle
582	mmu-miR-466h-3p_R+3_3	TACGCACGCACACACACACACT	up	1.19954	0.262479	0.329164	14.6479	17.5707	14.3729	15.204	14.3667	14.5185	16.1456	22.0478	16.5	13.5	15	14	17	21	middle
583	mmu-miR-466h-3p_R+3_2	TACGCACGCACACACACACACC	up	1.19954	0.262479	0.329164	14.6479	17.5707	14.3729	15.204	14.3667	14.5185	16.1456	22.0478	16.5	13.5	15	14	17	21	middle
584	mmu-miR-466h-3p_R+3_1	TACGCACGCACACACACACACA	up	1.19954	0.262479	0.329164	14.6479	17.5707	14.3729	15.204	14.3667	14.5185	16.1456	22.0478	16.5	13.5	15	14	17	21	middle
585	PC-3p-18252_37	CGTGGATCGCCTCAGCTGC	up	2.75205	1.4605	0.329354	9.71077	26.7245	4.35543	24.7769	0	5.18518	25.6431	49.3452	5	22	0	5	27	47	middle
586	bta-mir-2904-1-p5_1ss12TC	CTCGGTTGGCCCCGGATA	down	0.475908	-1.07124	0.33165	11.7828	5.60751	5.66206	9.57288	20.1133	0	4.74872	12.0738	6.5	8.5	21	0	5	11.5	middle
587	mmu-miR-130a-3p	CAGTGCAATGTTAAAAGGGCAT	up	1.06597	0.0921641	0.333232	38105.1	40618.8	34570.8	40599.7	39144.9	43148.5	40143.8	38564.3	39687	36049.5	40870.5	41607.5	42268	36731.5	high
588	mmu-miR-467e-5p_1ss4AG	ATAGGTGTGAGCATGTATATGT	up	2.28942	1.19498	0.333847	2.07519	4.75098	0	0	6.22556	3.62963	3.79898	6.82433	0	0	6.5	3.5	4	6.5	low
589	mmu-miR-466m-3p_R+1	TACATACACACATACACACGCAA	down	0.721907	-0.470115	0.333994	10.2104	7.37098	10.0175	12.9515	7.66222	8.81481	3.3241	9.97402	11.5	11.5	8	8.5	3.5	9.5	middle
590	mmu-miR-221-3p	AGCTACATTGTCTGCTGGGTTTC	up	1.09603	0.132285	0.335504	2835.42	3107.7	2795.32	3187.21	2523.74	3266.66	3259.52	2796.93	3209	2830	2635	3150	3432	2664	middle
591	mmu-miR-96-3p	CAATCATGTGTAGTGCCAATAT	down	0.723045	-0.467843	0.336391	53.3858	38.6003	41.8122	48.4275	69.9178	46.6666	51.2862	17.8483	48	43	73	45	54	17	middle
592	mmu-miR-331-3p	GCCCCTGGGCCTATCCTAGAA	up	1.07298	0.101622	0.336526	1338.43	1436.11	1442.52	1185.91	1386.86	1394.81	1473.05	1440.46	1656	1053	1448	1345	1551	1372	middle
593	mmu-miR-1930-5p	ACCTCCATAGTACCTGCAGCGT	down	0.863095	-0.212408	0.336993	57.7749	49.8652	56.6206	63.0684	53.6356	59.111	37.9898	52.4949	65	56	56	57	40	50	middle
594	bta-mir-2904-1-p3_1ss12TC	CTCGGTTGGCCCCGGATAGCCGG	down	0.307858	-1.69966	0.337544	10.7994	3.32467	3.0488	7.32044	22.0289	0	0	9.97402	3.5	6.5	23	0	0	9.5	middle
595	mmu-miR-6994-5p_L+1	CACAAAGGTGGGTGAAGCCGGTGA	down	0.606095	-0.722385	0.340322	9.73799	5.90214	8.71087	9.00977	11.4933	7.25925	10.4472	0	10	8	12	7	11	0	middle
596	mmu-miR-669e-5p_R+1	TGTCTTGTGTGTGCATGTTCATT	down	0.88803	-0.17132	0.341351	580.263	515.291	540.945	600.276	599.569	611.851	501.465	432.558	621	533	626	590	528	412	middle
597	PC-5p-24367_22	GAATTGATCAGGACCACCA	down	-inf	-inf	0.342643	15.4414	0	6.09761	0	40.2267	0	0	0	7	0	42	0	0	0	middle
598	mmu-miR-878-5p_R+1	TATCTAGTTGGATGTCAAGACAC	up	1.28993	0.36729	0.343143	15.0482	19.411	13.9374	10.136	21.0711	20.7407	22.7939	14.6986	16	9	22	20	24	14	middle
599	mmu-miR-143-3p_R+1	TGAGATGAAGCACTGTAGCTCT	up	1.42435	0.510305	0.344788	256.464	365.295	267.424	256.778	245.191	274.815	278.275	542.797	307	228	256	265	293	517	middle
600	mmu-let-7c-5p	TGAGGTAGTAGGTTGTATGGTT	up	1.0982	0.135136	0.345139	80345.3	88234.9	76836.1	85701.6	78498.3	95341.6	93829	75534.1	88207.1	76096.6	81958.8	91936.6	98794	71944.3	high
601	mmu-miR-450a-5p	TTTTGCGATGTGTTCCTAATAT	up	1.14216	0.19177	0.347345	22718.2	25947.9	20812	26415.5	20927	29531.7	26862.6	21449.4	23892	23455	21849.5	28477	28284	20430	high
602	mmu-miR-351-3p	GGTCAAGAGGCGCCTGGGAAC	up	1.06925	0.0965977	0.348393	6477.66	6926.23	7190.82	6037.67	6204.49	6559.25	7102.18	7117.25	8255	5361	6478	6325	7478	6779	middle
603	mmu-miR-669a-3-3p	ACATAACATACACACACATGTAT	down	0.878686	-0.18658	0.348904	286.22	251.498	321.866	270.293	266.502	250.703	205.62	298.171	369.5	240	278.25	241.75	216.5	284	middle
604	mmu-miR-615-3p_R-1	TCCGAGCCTGGGTCTCCCTCT	down	0.939883	-0.0894466	0.351129	8050.91	7566.91	8354.59	7963.51	7834.62	6784.29	8084.22	7832.23	9591	7071	8180	6542	8512	7460	high
605	efu-mir-9226-p3_1ss17GT_2	TCCCTGTTCGGGCGCCTAA	up	3.13889	1.65025	0.352584	0.798148	2.5053	0	0	2.39444	4.66666	2.84923	0	0	0	2.5	4.5	3	0	low
606	efu-mir-9226-p3_1ss17GT_1	TCCCTGTTCGGGCGCCTA	up	3.13889	1.65025	0.352584	0.798148	2.5053	0	0	2.39444	4.66666	2.84923	0	0	0	2.5	4.5	3	0	low
607	mmu-miR-8103_R+1	TCTCCTGTTCTCTGTTCTCCCT	down	0.755592	-0.40432	0.355122	25.0716	18.9439	28.7459	22.5244	23.9444	29.037	15.1959	12.5988	33	20	25	28	16	12	middle
608	mmu-miR-471-5p	TACGTAGTATAGTGCTTTTCAC	up	1.71499	0.7782	0.355384	13.8754	23.7963	11.3241	16.8933	13.4089	40.4444	15.1959	15.7485	13	15	14	39	16	15	middle
609	mmu-miR-7018-3p	TCACCCTGCTGCCGGCTTGCAG	up	1.42767	0.513661	0.358101	12.3978	17.6999	15.6796	15.7671	5.74667	15.5555	12.3467	25.1975	18	14	6	15	13	24	middle
610	bta-miR-11980_R-1_1ss4CG	AGGGAACGGGCTTGGCGGA	up	2.94975	1.56059	0.358758	0.725905	2.14124	2.17772	0	0	0	3.79898	2.62474	2.5	0	0	0	4	2.5	low
611	mmu-miR-32-5p_R-1	TATTGCACATTACTAAGTTGC	up	1.2093	0.274168	0.358772	120.551	145.782	93.2063	136.273	132.173	184.592	132.014	120.738	107	121	138	178	139	115	middle
612	hsa-mir-7977-p5_1ss5AG_1	TCCCGGCCAACGCACCAAAA	down	0.748146	-0.418607	0.360387	9.5463	7.14203	7.40424	10.6991	10.5356	3.62963	10.4472	7.34928	8.5	9.5	11	3.5	11	7	middle
613	hsa-mir-7977-p5_1ss5AG_2	TCCCGGCCAACGCACCAAAAA	down	0.748146	-0.418607	0.360387	9.5463	7.14203	7.40424	10.6991	10.5356	3.62963	10.4472	7.34928	8.5	9.5	11	3.5	11	7	middle
614	mmu-miR-6989-3p	TGTCCACTGTCTCTGGTCCCAG	up	2.77927	1.4747	0.362866	2.03254	5.64896	6.09761	0	0	0	8.5477	8.39918	7	0	0	0	9	8	low
615	mmu-miR-190b-5p	TGATATGTTTGATATTGGGTTG	down	0.65382	-0.613035	0.36424	19.5451	12.779	11.3241	28.1555	19.1556	20.7407	12.3467	5.24949	13	25	20	20	13	5	middle
616	mmu-mir-669f-p3_1ss24TA	AGTTGTGTGTGCATGTGCATGTGA	down	0.797025	-0.327303	0.36566	38.407	30.6114	45.2965	41.6702	28.2544	40.4444	30.3918	20.9979	52	37	29.5	39	32	20	middle
617	mmu-miR-126a-3p	TCGTACCGTGAGTAATAATGCG	up	1.1027	0.141037	0.367571	248627	274160	229116	270028	246736	312616	270484	239381	263023	239765	257613	301451	284797	228004	high
618	mmu-miR-743a-3p	GAAAGACACCAAGCTGAGTAGA	up	1.22164	0.288822	0.367782	40.2739	49.2003	35.7145	43.9226	41.1845	34.2222	59.8339	53.5448	41	39	43	33	63	51	middle
619	mmu-miR-145a-5p	GTCCAGTTTTCCCAGGAATCCCT	up	1.14032	0.189442	0.368963	80.6727	91.9929	83.6243	66.4471	91.9467	87.111	80.7282	108.139	96	59	96	84	85	103	middle
620	hsa-miR-4454_L-2	ATCCGAGTCACGGCACCA	down	0.926763	-0.109727	0.369751	4680.17	4337.41	4813.19	4153.5	5073.83	4176.66	4115.24	4720.34	5525.5	3688	5297.5	4027.5	4333	4496	middle
621	mmu-miR-425-3p_R+1	ATCGGGAATGTCGTGTCCGCCC	up	1.06276	0.0878096	0.373133	819.785	871.23	892.864	739.927	826.562	911.555	853.82	848.317	1025	657	863	879	899	808	middle
622	hsa-miR-30d-5p_L+2R+2	GTTGTAAACATCCCCGACTGGAAGCT	down	0.454647	-1.13718	0.373899	8.46728	3.84962	13.0663	5.63111	6.70445	0	0	11.5489	15	5	7	0	0	11	middle
623	mmu-mir-466i-p5_1ss4GA	TATATATGTGTGTGTGTGTGT	up	3.51255	1.81252	0.374831	1.01627	3.56969	3.0488	0	0	3.11111	7.59795	0	3.5	0	0	3	8	0	low
624	cfa-miR-30d_R+2	TGTAAACATCCCCGACTGGAAGCTAG	up	1.09946	0.136791	0.37564	141.181	155.222	162.022	128.389	133.131	137.926	157.657	170.083	186	114	139	133	166	162	middle
625	mmu-miR-3061-3p_1ss3AG	CTGCCTTTGATAGTCCACTGCC	down	0.259443	-1.94651	0.37669	6.10118	1.58291	0	13.5147	4.78889	0	4.74872	0	0	12	5	0	5	0	middle
626	mmu-miR-193a-5p	TGGGTCTTTGCGGGCAAGATGA	up	1.06061	0.0848988	0.376715	127.604	135.339	124.565	138.525	119.722	134.815	126.316	144.886	143	123	125	130	133	138	middle
627	cja-miR-9933_1ss12AT	ATCTATCACCCTTGACTGATGGCT	up	1.19514	0.257186	0.377279	161.66	193.207	206.012	164.991	113.976	162.296	204.195	213.129	236.5	146.5	119	156.5	215	203	middle
628	mmu-miR-378b_R-1	CTGGACTTGGAGTCAGAAG	down	0.734146	-0.445861	0.377858	8.5171	6.2528	8.71087	10.136	6.70445	4.49382	4.11556	10.149	10	9	7	4.33333	4.33333	9.66667	middle
629	hsa-mir-4454-p3	TCCGAGTCACGGCACCAAA	up	1.10281	0.141182	0.378516	947.723	1045.16	942.516	828.899	1071.75	988.295	964.465	1182.71	1082	736	1119	953	1015.5	1126.5	middle
630	mmu-miR-23b-3p_R+3	ATCACATTGCCAGGGATTACCACT	down	0.971787	-0.0412884	0.378917	60876	59158.5	61525.3	58468.9	62633.9	56989.3	59307.7	61178.6	70630.5	51916	65395	54954	62446	58271	high
631	mmu-miR-669f-3p_L-1R-1	ATATACATACACACACACGTA	up	1.05983	0.0838299	0.380651	232.821	246.75	212.545	245.516	240.402	248.889	228.888	262.474	244	218	251	240	241	250	middle
632	mmu-miR-3473a_1ss18AC	TGGAGAGATGGCTCAGCC	up	2.11655	1.08172	0.380776	1.00109	2.11885	0	3.00326	0	2.07407	2.53265	1.74983	0	2.66667	0	2	2.66667	1.66667	low
633	mmu-miR-466f_L-1R+2	CGTGTGTGTGCATGTGCATGTGA	down	0.318175	-1.65211	0.381414	2.48748	0.791453	0	5.068	2.39444	0	2.37436	0	0	4.5	2.5	0	2.5	0	low
634	mmu-miR-3068-3p	GGTGAATTGCAGTACTCCAACA	down	0.90963	-0.136649	0.382169	144.656	131.583	160.28	132.894	140.793	152.444	121.567	120.738	184	118	147	147	128	115	middle
635	mmu-miR-466f-3p_L-1R+4_3	ATACACACACACATACACACTCTT	down	0.794375	-0.332107	0.383422	9.76359	7.75596	11.3241	11.2622	6.70445	10.3704	7.12308	5.77443	13	10	7	10	7.5	5.5	middle
636	mmu-miR-466f-3p_L-1R+4_2	ATACACACACACATACACACGCAG	down	0.794375	-0.332107	0.383422	9.76359	7.75596	11.3241	11.2622	6.70445	10.3704	7.12308	5.77443	13	10	7	10	7.5	5.5	middle
637	mmu-miR-466f-3p_L-1R+4_1	ATACACACACACATACACACGCAA	down	0.794375	-0.332107	0.383422	9.76359	7.75596	11.3241	11.2622	6.70445	10.3704	7.12308	5.77443	13	10	7	10	7.5	5.5	middle
638	mmu-miR-3063-3p	TGAGGAATCCTGATCTCTCGCC	down	0.829239	-0.27014	0.38419	19.6411	16.2872	20.9061	23.6506	14.3667	18.6666	12.3467	17.8483	24	21	15	18	13	17	middle
639	ssc-miR-30a-3p_L-1R+1	TTTCAGTCGGATGTTTGCAGCC	up	1.2392	0.309405	0.384277	18.0817	22.4068	22.6483	19.1458	12.4511	21.7778	17.0954	28.3472	26	17	13	21	18	27	middle
640	mmu-miR-199b-5p	CCCAGTGTTTAGACTACCTGTTC	down	0.939689	-0.0897444	0.385868	323.812	304.283	336.239	289.439	345.758	319.407	296.32	297.121	386	257	361	308	312	283	middle
641	mmu-miR-669l-5p_R+1	AGTTGTGTGTGCATGTATATGTA	down	0.627393	-0.672559	0.386906	5.73609	3.59878	5.66206	6.75733	4.78889	4.14814	6.64821	0	6.5	6	5	4	7	0	low
642	mmu-miR-125a-3p_R-1	ACAGGTGAGGTTCTTGGGAGC	down	0.927874	-0.107999	0.38747	1330.19	1234.25	1384.16	1263.62	1342.8	1094.07	1217.57	1391.11	1589	1122	1402	1055	1282	1325	middle
643	mdo-miR-210-3p_L-1R+2	CTGTGCGTGTGACAGCGGCTAT	up	2.99097	1.58061	0.388504	1.74217	5.21079	5.22652	0	0	5.18518	10.4472	0	6	0	0	5	11	0	middle
644	mmu-miR-140-3p_L-1R+2	ACCACAGGGTAGAACCACGGAC	up	1.09008	0.124436	0.388513	12286.6	13393.3	13798.9	10837.6	12223.2	11915.5	13836.8	14427.7	15841	9623	12762	11490	14569	13742	high
645	mmu-mir-466d-p5_1ss23TA	TATACATACACGCACACATAGAA	down	0.712758	-0.488516	0.389507	12.3545	8.8058	13.0663	6.75733	17.24	8.29629	12.3467	5.77443	15	6	18	8	13	5.5	middle
646	mmu-miR-3076-3p_R+1	CGCACTCTGGTCTTCCCTTGCAGT	down	0.336089	-1.57309	0.389731	5.65174	1.89949	11.3241	5.63111	0	0	5.69846	0	13	5	0	0	6	0	middle
647	mmu-miR-29c-3p	TAGCACCATTTGAAATCGGTTA	up	1.13823	0.186789	0.391044	654.201	744.63	538.767	685.869	737.968	881.481	635.854	716.555	618.5	609	770.5	850	669.5	682.5	middle
648	bta-miR-378_R+2	ACTGGACTTGGAGTCAGAAGGCAG	up	1.10442	0.143295	0.391437	118.234	130.581	134.583	110.933	109.187	122.889	118.718	150.135	154.5	98.5	114	118.5	125	143	middle
649	mdo-miR-196b_R+1_1ss12CA	TAGGTAGTTTCATGTTGTTGGC	up	1.39996	0.485384	0.391468	8.58536	12.0191	5.22652	12.3884	8.14111	15.037	14.721	6.29938	6	11	8.5	14.5	15.5	6	middle
650	dno-miR-196c-5p	TAGGTAGTTTCATGTTGTTGGC	up	1.39996	0.485384	0.391468	8.58536	12.0191	5.22652	12.3884	8.14111	15.037	14.721	6.29938	6	11	8.5	14.5	15.5	6	middle
651	mmu-miR-7654-5p_R-1	GGAGTCGCGCTCCCGCTCGCG	up	1.17853	0.236987	0.392131	16.5272	19.4778	19.1639	11.2622	19.1556	20.7407	20.8944	16.7984	22	10	20	20	22	16	middle
652	mmu-miR-340-3p_R+1	TCCGTCTCAGTTACTTTATAGCC	down	0.907848	-0.139478	0.392572	267.199	242.576	268.295	242.138	291.164	270.666	255.481	201.58	308	215	304	261	269	192	middle
653	mmu-miR-133a-3p_L-1R+1	TTGGTCCCCTTCAACCAGCTGT	up	46.4404	5.53731	0.394354	7.56648	351.39	12.1952	6.19422	4.31	13.4815	50.8113	989.878	14	5.5	4.5	13	53.5	942.833	middle
654	mmu-miR-1a-3p	TGGAATGTAAAGAAGTATGTAT	up	42.8823	5.42231	0.39918	13.0396	559.168	12.1952	13.5147	13.4089	21.7778	69.3313	1586.39	14	12	14	21	73	1511	middle
655	mmu-miR-3473g_R+2	CAAAAGTGAGGCTGGGGAGAGT	down	0.776792	-0.3644	0.401558	18.8116	14.6127	26.1326	16.8933	13.4089	16.5926	10.4472	16.7984	30	15	14	16	11	16	middle
656	mmu-miR-133b-3p_R-1	TTTGGTCCCCTTCAACCAGCT	up	inf	inf	0.404222	0	50.3448	0	0	0	0	4.74872	146.286	0	0	0	0	5	139.333	middle
657	mmu-miR-466h-5p_R+3	TGTGTGCATGTGCTTGTGTGTATGA	down	0.8693	-0.202074	0.404786	11.9222	10.364	12.1952	13.5147	10.0567	8.29629	12.8215	9.97402	14	12	10.5	8	13.5	9.5	middle
658	mmu-miR-7083-5p	TCGGGGCTGGACAAGCAGAGA	up	1.22107	0.288141	0.406191	36.1538	44.1461	47.9098	27.0293	33.5222	51.8518	32.2913	48.2953	55	24	35	50	34	46	middle
659	mmu-miR-29b-1-5p_R+2	GCTGGTTTCATATGGTGGTTTAGA	down	0.714159	-0.485682	0.407164	47.19	33.7012	38.3278	56.3111	46.9311	59.111	19.9446	22.0478	44	50	49	57	21	21	middle
660	mmu-miR-466m-3p_1ss22AT	TACATACACACATACACACGCT	down	0.646881	-0.628429	0.407298	3.60641	2.33291	3.91989	4.50489	2.39444	0	3.3241	3.67464	4.5	4	2.5	0	3.5	3.5	low
661	mmu-miR-378c_R-1	ACTGGACTTGGAGTCAGAAG	down	0.921615	-0.117764	0.410064	749.98	691.193	776.138	645.325	828.478	648.493	678.434	746.652	891	573	865	625.333	714.333	711.167	middle
662	mmu-miR-206-3p	TGGAATGTAAGGAAGTGTGTGG	up	19.7234	4.30183	0.411847	5.24111	103.372	7.83978	7.88355	0	0	16.1456	293.971	9	7	0	0	17	280	middle
663	mmu-mir-3473h-p3	TGACTGCTCTTCCAGAGGTCCTGA	down	0.610933	-0.710914	0.419198	10.8752	6.64403	19.1639	6.75733	6.70445	5.18518	9.49744	5.24949	22	6	7	5	10	5	middle
664	mmu-miR-1839-5p	AAGGTAGATAGAACAGGTCTTG	down	0.94403	-0.083095	0.419692	1346.47	1271.1	1241.3	1360.48	1437.62	1382.37	1260.31	1170.64	1425	1208	1501	1333	1327	1115	middle
665	mmu-miR-1982-3p	TCTCACCCTATGTTCTCCCACAG	up	1.39137	0.476501	0.421202	9.17654	12.7679	5.22652	14.6409	7.66222	7.25925	14.2462	16.7984	6	13	8	7	15	16	middle
666	mmu-miR-3473h-5p	TAGGGGCTGGAAAGGTGACT	down	0.403886	-1.30798	0.422213	3.91919	1.58291	6.96869	0	4.78889	0	4.74872	0	8	0	5	0	5	0	low
667	mmu-miR-1b-3p	TGGGTACATAAAGAAGTATGTGC	up	inf	inf	0.42265	0	1.89949	0	0	0	0	5.69846	0	0	0	0	0	6	0	low
668	mmu-miR-30f_L+1R-1_1ss17AG	TGTAAACATCCGACTGGAAGCT	up	inf	inf	0.42265	0	1.72839	0	0	0	5.18518	0	0	0	0	0	5	0	0	low
669	mmu-miR-92b-5p	AGGGACGGGACGTGGTGCAGTGTT	down	-inf	-inf	0.42265	1.45181	0	4.35543	0	0	0	0	0	5	0	0	0	0	0	low
670	mmu-miR-124-3p_R+1	TAAGGCACGCGGTGAATGCCA	up	inf	inf	0.42265	0	0.92181	0	0	0	2.76543	0	0	0	0	0	2.66667	0	0	low
671	mmu-miR-133a-5p_L+1	AGCTGGTAAAATGGAACCAAAT	up	inf	inf	0.42265	0	2.09979	0	0	0	0	0	6.29938	0	0	0	0	0	6	low
672	mmu-miR-134-5p	TGTGACTGGTTGACCAGAGGGG	up	inf	inf	0.42265	0	3.45679	0	0	0	10.3704	0	0	0	0	0	10	0	0	middle
673	mmu-miR-143-5p_R+2	GGTGCAGTGCTGCATCTCTGGTT	down	-inf	-inf	0.42265	1.45181	0	4.35543	0	0	0	0	0	5	0	0	0	0	0	low
674	mmu-miR-146a-3p_L-2R+2	TGTGAAATTCAGTTCTTCAGTT	up	inf	inf	0.42265	0	1.58291	0	0	0	0	4.74872	0	0	0	0	0	5	0	low
675	mmu-miR-192-3p_R+1	CTGCCAATTCCATAGGTCACAGT	up	inf	inf	0.42265	0	2.21607	0	0	0	0	6.64821	0	0	0	0	0	7	0	low
676	mmu-miR-193b-5p	CGGGGTTTTGAGGGCGAGATGA	down	-inf	-inf	0.42265	3.48435	0	10.453	0	0	0	0	0	12	0	0	0	0	0	middle
677	mmu-miR-297c-5p_R+1	ATGTATGTGTGCATGTACATGTT	up	inf	inf	0.42265	0	0.874914	0	0	0	0	0	2.62474	0	0	0	0	0	2.5	low
678	mmu-miR-297c-3p_L+1_1ss22TA	ATATACATACACACATACCCAAA	up	inf	inf	0.42265	0	1.26633	0	0	0	0	3.79898	0	0	0	0	0	4	0	low
679	mmu-miR-297c-3p_L+1R-1_1ss3AG	ATGTACATACACACATACCCAT	up	inf	inf	0.42265	0	0.791453	0	0	0	0	2.37436	0	0	0	0	0	2.5	0	low
680	mmu-miR-297a-5p_L+2	ATATGTATGTGTGCATGTGCATGT	up	inf	inf	0.42265	0	1.10803	0	0	0	0	3.3241	0	0	0	0	0	3.5	0	low
681	mmu-miR-320-5p	GCCTTCTCTTCCCGGTTCTTCC	down	-inf	-inf	0.42265	1.74217	0	5.22652	0	0	0	0	0	6	0	0	0	0	0	low
682	mmu-miR-365-1-5p_R+1	AGGGACTTTTGGGGGCAGATGTGT	down	-inf	-inf	0.42265	1.45181	0	4.35543	0	0	0	0	0	5	0	0	0	0	0	low
683	mmu-miR-379-3p_R-1	TATGTAACATGGTCCACTAAC	up	inf	inf	0.42265	0	1.74983	0	0	0	0	0	5.24949	0	0	0	0	0	5	low
684	mmu-miR-411-5p	TAGTAGACCGTATAGCGTACG	up	inf	inf	0.42265	0	2.09979	0	0	0	0	0	6.29938	0	0	0	0	0	6	low
685	mmu-mir-466d-p5_1ss2AG	TGTACATACACGCACACATAGA	down	-inf	-inf	0.42265	0.871087	0	2.61326	0	0	0	0	0	3	0	0	0	0	0	low
686	mmu-miR-466h-5p_R+1	TGTGTGCATGTGCTTGTGTGTAA	up	inf	inf	0.42265	0	0.864197	0	0	0	2.59259	0	0	0	0	0	2.5	0	0	low
687	mmu-miR-466f-3p_L-2R+5	TACACACACACATACACACTCATT	up	inf	inf	0.42265	0	0.864197	0	0	0	2.59259	0	0	0	0	0	2.5	0	0	low
688	mmu-miR-466l-3p_L-2R+2	TAAATACATGCACACATATTCA	down	-inf	-inf	0.42265	1.5963	0	0	0	4.78889	0	0	0	0	0	5	0	0	0	low
689	mmu-miR-466c-5p_R-4_1ss20CA	TGATGTGTGTGTGCATGTAA	down	-inf	-inf	0.42265	0.938518	0	0	2.81555	0	0	0	0	0	2.5	0	0	0	0	low
690	mmu-miR-466j	TGTGTGCATGTGCATGTGTGTAA	down	-inf	-inf	0.42265	0.725905	0	2.17772	0	0	0	0	0	2.5	0	0	0	0	0	low
691	mmu-miR-467f_R+1_1ss8CA	ATATACAAACACACACCTACAC	up	inf	inf	0.42265	0	0.349966	0	0	0	0	0	1.0499	0	0	0	0	0	1	low
692	mmu-miR-470-3p	AACCAGTACCTTTCTGAGAAGA	down	-inf	-inf	0.42265	1.91556	0	0	0	5.74667	0	0	0	0	0	6	0	0	0	low
693	mmu-miR-495-3p	AAACAAACATGGTGCACTTCTT	up	inf	inf	0.42265	0	2.07407	0	0	0	6.22222	0	0	0	0	0	6	0	0	low
694	mmu-miR-669d-2-3p_L-1R+1	TATACATACACACCCATATACT	down	-inf	-inf	0.42265	0.957778	0	0	0	2.87333	0	0	0	0	0	3	0	0	0	low
695	mmu-miR-669f-3p_L+1	CCATATACATACACACACACGTAT	up	inf	inf	0.42265	0	1.0499	0	0	0	0	0	3.14969	0	0	0	0	0	3	low
696	mmu-miR-669f-3p_R-1_1ss22AT	CATATACATACACACACACGTT	up	inf	inf	0.42265	0	0.874914	0	0	0	0	0	2.62474	0	0	0	0	0	2.5	low
697	mmu-miR-669l-5p_L+1	CAGTTGTGTGTGCATGTATATGT	down	-inf	-inf	0.42265	1.16145	0	3.48435	0	0	0	0	0	4	0	0	0	0	0	low
698	mmu-miR-669o-5p_R-3	TAGTTGTGTGTGCATGTTTA	down	-inf	-inf	0.42265	1.16145	0	3.48435	0	0	0	0	0	4	0	0	0	0	0	low
699	mmu-mir-881-p5	TATTCAGAGAGATAACAGTCAC	up	inf	inf	0.42265	0	1.74983	0	0	0	0	0	5.24949	0	0	0	0	0	5	low
700	mmu-miR-883b-5p_R+2	TACTGAGAATGGGTAGCAGTCACT	up	inf	inf	0.42265	0	1.58291	0	0	0	0	4.74872	0	0	0	0	0	5	0	low
701	mmu-miR-1195_L-2R-3_1ss20CG	AGTTCGAGGCCAGCCTGG	down	-inf	-inf	0.42265	1.45181	0	4.35543	0	0	0	0	0	5	0	0	0	0	0	low
702	mmu-miR-1224-5p_R+1	GTGAGGACTGGGGAGGTGGAGG	down	-inf	-inf	0.42265	1.91556	0	0	0	5.74667	0	0	0	0	0	6	0	0	0	low
703	mmu-miR-1231-5p_L-1	CTGGGCAGAGCTGCAGGAGAGA	up	inf	inf	0.42265	0	1.74983	0	0	0	0	0	5.24949	0	0	0	0	0	5	low
704	mmu-miR-1258-3p_R-1_1ss6GA	TTAGGAAATTAGCTCAGCAGT	up	inf	inf	0.42265	0	1.72839	0	0	0	5.18518	0	0	0	0	0	5	0	0	low
705	mmu-miR-1927_1ss23AT	GACCTCTGGATGTTAGGGACTGT	down	-inf	-inf	0.42265	2.62785	0	0	7.88355	0	0	0	0	0	7	0	0	0	0	low
706	mmu-miR-1932	GTTGCGGACAGCGCTAGGTCGG	down	-inf	-inf	0.42265	1.45181	0	4.35543	0	0	0	0	0	5	0	0	0	0	0	low
707	mmu-miR-1933-5p_L+1R-1	CAGTCATGGTGTTCGGTCTTAGTT	up	inf	inf	0.42265	0	1.58291	0	0	0	0	4.74872	0	0	0	0	0	5	0	low
708	mmu-miR-1949_L-1	TATACCAGGATGTCAGCATAGTT	up	inf	inf	0.42265	0	1.74983	0	0	0	0	0	5.24949	0	0	0	0	0	5	low
709	rno-miR-1956-3p_L+3	CCCTGGCTGGCACCTGGACGT	up	inf	inf	0.42265	0	1.72839	0	0	0	5.18518	0	0	0	0	0	5	0	0	low
710	mmu-miR-1968-3p_R+1	ACCACCTCTGCAGCTGTTAAGT	down	-inf	-inf	0.42265	1.5963	0	0	0	4.78889	0	0	0	0	0	5	0	0	0	low
711	mmu-miR-3058-3p_R+1	TTCCTGTCAGCCGTGGGTGCCT	down	-inf	-inf	0.42265	1.5963	0	0	0	4.78889	0	0	0	0	0	5	0	0	0	low
712	mmu-miR-3090-3p	TCCCAGGTGACACCCTGACTCA	down	-inf	-inf	0.42265	1.74217	0	5.22652	0	0	0	0	0	6	0	0	0	0	0	low
713	mmu-miR-3092-3p_L-1R+3	AATGGGGCTGTTTCCCCTCCTGT	down	-inf	-inf	0.42265	1.45181	0	4.35543	0	0	0	0	0	5	0	0	0	0	0	low
714	mmu-miR-3097-5p_R-1	CACAGGTGGGAAGTGTGTGTCC	up	inf	inf	0.42265	0	1.74983	0	0	0	0	0	5.24949	0	0	0	0	0	5	low
715	mmu-miR-3113-5p	GTCCTGGCCCTGGTCCGGGTCC	up	inf	inf	0.42265	0	2.79973	0	0	0	0	0	8.39918	0	0	0	0	0	8	low
716	mmu-mir-3473d-p3	GGCTGGAGAGGTGGCTCAGTGGC	up	inf	inf	0.42265	0	1.74983	0	0	0	0	0	5.24949	0	0	0	0	0	5	low
717	mmu-miR-3572-5p_L+1R-2	TTGGGGAACAGGGCAAGGTGG	down	-inf	-inf	0.42265	1.45181	0	4.35543	0	0	0	0	0	5	0	0	0	0	0	low
718	mmu-mir-5098-p3	TCTGTGTAGCCCTGGCTG	down	-inf	-inf	0.42265	2.25244	0	0	6.75733	0	0	0	0	0	6	0	0	0	0	low
719	mmu-miR-5100_R-1	TCGAATCCCAGCGGTGCCTC	up	inf	inf	0.42265	0	3.49966	0	0	0	0	0	10.499	0	0	0	0	0	10	middle
720	mmu-miR-5104_L-1R-1	TGTGCTAGTGAGGTGGCTCAGC	up	inf	inf	0.42265	0	1.74983	0	0	0	0	0	5.24949	0	0	0	0	0	5	low
721	mmu-mir-5114-p3_1ss21GT	TTGCAGTTCCTGTTCCAGAAT	down	-inf	-inf	0.42265	1.45181	0	4.35543	0	0	0	0	0	5	0	0	0	0	0	low
722	mmu-miR-5129-3p_R-1_1ss21CT	AATGTGCCTGTGCATCTCTTT	up	inf	inf	0.42265	0	1.58291	0	0	0	0	4.74872	0	0	0	0	0	5	0	low
723	mmu-miR-5132-5p_L-1R+2	CGTGGGGTGGTGGACTCAGGCT	down	-inf	-inf	0.42265	1.74217	0	5.22652	0	0	0	0	0	6	0	0	0	0	0	low
724	mmu-miR-5616-5p	TTTCCTCTCATCACAAGTTGA	down	-inf	-inf	0.42265	1.5963	0	0	0	4.78889	0	0	0	0	0	5	0	0	0	low
725	mmu-miR-5627-3p	ACAGGGCTCTCCGGCGCCCCTCGT	up	inf	inf	0.42265	0	2.09979	0	0	0	0	0	6.29938	0	0	0	0	0	6	low
726	mmu-miR-6238_L-1R-3_1ss12TC	TATTAGTCAGCGGAGGAA	down	-inf	-inf	0.42265	2.23482	0	0	0	6.70445	0	0	0	0	0	7	0	0	0	low
727	mmu-miR-6516-3p_L-2R+2	ATGTATGATACTGCAAACAGGA	up	inf	inf	0.42265	0	3.49966	0	0	0	0	0	10.499	0	0	0	0	0	10	middle
728	mmu-miR-6715-5p_R-1	ACAGGCACCACAGGTTTGAGCA	down	-inf	-inf	0.42265	2.25244	0	0	6.75733	0	0	0	0	0	6	0	0	0	0	low
729	mmu-miR-6896-5p_R+2	TTTGTAGGCGACGAGAACCCGTGT	down	-inf	-inf	0.42265	1.5963	0	0	0	4.78889	0	0	0	0	0	5	0	0	0	low
730	mmu-miR-6898-5p	TGTAAGGGGAGATGCAGGGAGC	up	inf	inf	0.42265	0	1.74983	0	0	0	0	0	5.24949	0	0	0	0	0	5	low
731	mmu-miR-6918-5p	TGCTGAGGACGGGATTAGGTTCT	down	-inf	-inf	0.42265	1.45181	0	4.35543	0	0	0	0	0	5	0	0	0	0	0	low
732	mmu-miR-6928-5p	AGGGGATTTGCATGGACTGCACT	up	inf	inf	0.42265	0	1.58291	0	0	0	0	4.74872	0	0	0	0	0	5	0	low
733	mmu-miR-6940-3p_R-1	TTACCTTCCGTGCTTGCCCGCA	down	-inf	-inf	0.42265	1.91556	0	0	0	5.74667	0	0	0	0	0	6	0	0	0	low
734	mmu-miR-6951-5p	TTGTATTTGTGTGATTAAAGT	up	inf	inf	0.42265	0	1.72839	0	0	0	5.18518	0	0	0	0	0	5	0	0	low
735	mmu-miR-6955-5p_R+1	AGGGCCTCAGGACTCAGGAGGTGAT	down	-inf	-inf	0.42265	1.87704	0	0	5.63111	0	0	0	0	0	5	0	0	0	0	low
736	mmu-miR-6963-3p_L+1R-2	TTGCCTCTTGCCTCCATCCCAC	up	inf	inf	0.42265	0	1.89949	0	0	0	0	5.69846	0	0	0	0	0	6	0	low
737	mmu-miR-6970-3p_R+1	TCACGCCACCCACCCTGTGCTC	up	inf	inf	0.42265	0	1.72839	0	0	0	5.18518	0	0	0	0	0	5	0	0	low
738	mmu-miR-6975-3p_L+2	TGTCTCTCCTTTCTCCTCCTAG	up	inf	inf	0.42265	0	1.72839	0	0	0	5.18518	0	0	0	0	0	5	0	0	low
739	mmu-miR-6991-5p_L+2R-1	AGTGGAGAACAGGGACTGGGCCT	down	-inf	-inf	0.42265	1.74217	0	5.22652	0	0	0	0	0	6	0	0	0	0	0	low
740	mmu-miR-6993-5p	AGTGGGAGAAACGGGTGTCTGTC	down	-inf	-inf	0.42265	1.74217	0	5.22652	0	0	0	0	0	6	0	0	0	0	0	low
741	mmu-miR-6994-3p	AACGATCTTCTCCGTCTTTGC	up	inf	inf	0.42265	0	2.07407	0	0	0	6.22222	0	0	0	0	0	6	0	0	low
742	mmu-miR-6998-5p_1ss21CA	CTGGGCAGAGGGCAAAGTGAAT	up	inf	inf	0.42265	0	1.58291	0	0	0	0	4.74872	0	0	0	0	0	5	0	low
743	mmu-miR-7009-5p	TTGGGGTCAGGGGACCAGAGCT	up	inf	inf	0.42265	0	1.72839	0	0	0	5.18518	0	0	0	0	0	5	0	0	low
744	mmu-miR-7024-5p	TTGGGGGATGGGTTGCTTGGC	up	inf	inf	0.42265	0	1.58291	0	0	0	0	4.74872	0	0	0	0	0	5	0	low
745	mmu-miR-7031-5p_L-1	CTGAGAGGCCTGAAGGGTGGGA	up	inf	inf	0.42265	0	2.09979	0	0	0	0	0	6.29938	0	0	0	0	0	6	low
746	mmu-miR-7036b-5p	ACGCGGGGTTCTCTGTGGAAGC	up	inf	inf	0.42265	0	1.58291	0	0	0	0	4.74872	0	0	0	0	0	5	0	low
747	mmu-miR-7052-5p_R-1	TGTGGGAAGGTGGAGGCCTT	down	-inf	-inf	0.42265	1.5963	0	0	0	4.78889	0	0	0	0	0	5	0	0	0	low
748	mmu-miR-7082-3p_R-2	GCCCCCCTTGCTGTCTGTCT	up	inf	inf	0.42265	0	1.74983	0	0	0	0	0	5.24949	0	0	0	0	0	5	low
749	mmu-miR-7091-5p	GTAGGGGTGATAGATTCCATGGC	up	inf	inf	0.42265	0	1.58291	0	0	0	0	4.74872	0	0	0	0	0	5	0	low
750	mmu-miR-7219-3p	TATCCGGGTTTCTAACACACT	up	inf	inf	0.42265	0	1.58291	0	0	0	0	4.74872	0	0	0	0	0	5	0	low
751	mmu-miR-7235-3p	TCTGACTTCTTGCTTCTCTCCTC	up	inf	inf	0.42265	0	2.79973	0	0	0	0	0	8.39918	0	0	0	0	0	8	low
752	mmu-miR-7648-3p	AGGGCTGGGCCCGGGACGCGG	up	inf	inf	0.42265	0	1.58291	0	0	0	0	4.74872	0	0	0	0	0	5	0	low
753	mmu-miR-7651-5p_R-1	AAGTGGAAAGCCAGCCTGAGA	down	-inf	-inf	0.42265	2.23482	0	0	0	6.70445	0	0	0	0	0	7	0	0	0	low
754	mmu-miR-7655-5p_R+2	CGGCCCACGGAGCTCCTAAAGACT	down	-inf	-inf	0.42265	2.3229	0	6.96869	0	0	0	0	0	8	0	0	0	0	0	low
755	mmu-miR-7658-5p_R+2	TGTGGGCGTGGCGGTGCTGGAC	down	-inf	-inf	0.42265	1.45181	0	4.35543	0	0	0	0	0	5	0	0	0	0	0	low
756	mmu-miR-7659-5p_R+1	AGGAGCCGGCTCCAGATTCCTGT	up	inf	inf	0.42265	0	2.76543	0	0	0	8.29629	0	0	0	0	0	8	0	0	low
757	mmu-miR-7667-3p	AGGGACTGCAGAGATGGCACTG	down	-inf	-inf	0.42265	2.61326	0	7.83978	0	0	0	0	0	9	0	0	0	0	0	low
758	mmu-miR-7677-3p_1ss23GT	CCGGCTGTGTCCTCTCACCTAGT	up	inf	inf	0.42265	0	3.14969	0	0	0	0	0	9.44907	0	0	0	0	0	9	low
759	mmu-miR-8105_1ss22GT	AGGCGACTGGCGAGACCCGAAT	up	inf	inf	0.42265	0	1.74983	0	0	0	0	0	5.24949	0	0	0	0	0	5	low
760	mmu-mir-8114-p5	AGAGCGGAGAATGGGAGTAGAGC	up	inf	inf	0.42265	0	1.74983	0	0	0	0	0	5.24949	0	0	0	0	0	5	low
761	mmu-miR-8120_R-1	TGTGCCTTGCAACTTCCGAGC	up	inf	inf	0.42265	0	2.07407	0	0	0	6.22222	0	0	0	0	0	6	0	0	low
762	mmu-miR-12194-3p	TCTGTGGGTCTGTTTGTCCGTC	up	inf	inf	0.42265	0	2.53265	0	0	0	0	7.59795	0	0	0	0	0	8	0	low
763	mmu-miR-12199-3p_R+1	ACACTGGTTCTCTCTGGCTCTC	up	inf	inf	0.42265	0	1.89949	0	0	0	0	5.69846	0	0	0	0	0	6	0	low
764	mmu-miR-12201-3p	TCTGCAGAGGCTTCCTTGGCT	down	-inf	-inf	0.42265	1.5963	0	0	0	4.78889	0	0	0	0	0	5	0	0	0	low
765	rno-mir-3553-p5	TTATGGCCCTTCGGTAATTCACT	up	inf	inf	0.42265	0	2.07407	0	0	0	6.22222	0	0	0	0	0	6	0	0	low
766	hsa-miR-8072_L+2R+1	ATGGCGGCGGGGAGGTAGGCAGA	up	inf	inf	0.42265	0	1.74983	0	0	0	0	0	5.24949	0	0	0	0	0	5	low
767	ssc-miR-30b-5p_L+1	GTGTAAACATCCTACACTCAGCT	up	inf	inf	0.42265	0	1.72839	0	0	0	5.18518	0	0	0	0	0	5	0	0	low
768	bta-miR-146a_R-3	TGAGAACTGAATTCCATAGGT	up	inf	inf	0.42265	0	1.72839	0	0	0	5.18518	0	0	0	0	0	5	0	0	low
769	cpo-miR-155-5p	TTAATGCTAATCGTGATAGGGGTT	down	-inf	-inf	0.42265	1.5963	0	0	0	4.78889	0	0	0	0	0	5	0	0	0	low
770	ssc-miR-206	TGGAATGTAAGGAAGTGTGTGA	up	inf	inf	0.42265	0	5.59945	0	0	0	0	0	16.7984	0	0	0	0	0	16	middle
771	mdo-miR-210-3p_L-1R+1	CTGTGCGTGTGACAGCGGCTA	up	inf	inf	0.42265	0	2.09979	0	0	0	0	0	6.29938	0	0	0	0	0	6	low
772	bta-miR-342_R-3	TCTCACACAGAAATCGCACCCA	down	-inf	-inf	0.42265	1.74217	0	5.22652	0	0	0	0	0	6	0	0	0	0	0	low
773	hsa-miR-4448_1ss6CG	GGCTCGTTGGTCTAGGGGTA	down	-inf	-inf	0.42265	2.3229	0	6.96869	0	0	0	0	0	8	0	0	0	0	0	low
774	cpo-miR-7-5p_R+1	TGGAAGACTAGTGATTTTGTTGTTC	down	-inf	-inf	0.42265	1.12622	0	0	3.37866	0	0	0	0	0	3	0	0	0	0	low
775	dno-miR-24b-3p_R-1_1ss20CA	TGGCTCAGTTCAGCAGGAAAG	up	inf	inf	0.42265	0	2.09979	0	0	0	0	0	6.29938	0	0	0	0	0	6	low
776	rno-mir-193a-p5_1ss1GA	ACGGACGGGAGCTGAGAGC	down	-inf	-inf	0.42265	1.45181	0	4.35543	0	0	0	0	0	5	0	0	0	0	0	low
777	hsa-miR-297_R+3_1	ATGTATGTGTGCATGTGCATGAAT	down	-inf	-inf	0.42265	1.45181	0	4.35543	0	0	0	0	0	5	0	0	0	0	0	low
778	hsa-miR-320d_R+1	AAAAGCTGGGTTGAGAGGAA	down	-inf	-inf	0.42265	1.12622	0	0	3.37866	0	0	0	0	0	3	0	0	0	0	low
779	cpo-miR-328-3p_R-2_1ss19CA	CTGGCCCTCTCTGCCCTTAT	up	inf	inf	0.42265	0	2.44976	0	0	0	0	0	7.34928	0	0	0	0	0	7	low
780	hsa-mir-650-p5_1ss9GA	AGTGCTGGAGTCTCAGGA	up	inf	inf	0.42265	0	1.74983	0	0	0	0	0	5.24949	0	0	0	0	0	5	low
781	bta-miR-1260b_L+1	GATCCCACCACTGCCACCA	up	inf	inf	0.42265	0	1.20988	0	0	0	3.62963	0	0	0	0	0	3.5	0	0	low
782	hsa-miR-1469_L-1R-2_1ss10GC	TCGGCGCGCGGCGCGGGCT	up	inf	inf	0.42265	0	3.14969	0	0	0	0	0	9.44907	0	0	0	0	0	9	low
783	bta-miR-2478_1ss11TC	GTATCCCACTCCTGACACCA	down	-inf	-inf	0.42265	1.91556	0	0	0	5.74667	0	0	0	0	0	6	0	0	0	low
784	ssc-mir-4335-p5_1ss1GA	ACCCCACGTTGGGCGCCA	up	inf	inf	0.42265	0	1.74983	0	0	0	0	0	5.24949	0	0	0	0	0	5	low
785	efu-mir-9226-p5	TCAAGTCCCTGTTCGGGCGCC	down	-inf	-inf	0.42265	0.725905	0	2.17772	0	0	0	0	0	2.5	0	0	0	0	0	low
786	pal-miR-9226-5p_L-2_1ss4AT	ATGTCCCTGTTCGGGCGCCA	down	-inf	-inf	0.42265	1.16145	0	3.48435	0	0	0	0	0	4	0	0	0	0	0	low
787	pal-mir-9226-p3_1ss18CT_2	TCCCTGTTCGGGCGCCATTT	up	inf	inf	0.42265	0	1.03704	0	0	0	3.11111	0	0	0	0	0	3	0	0	low
788	pal-mir-9226-p3_1ss18CT_1	TCCCTGTTCGGGCGCCATT	up	inf	inf	0.42265	0	1.03704	0	0	0	3.11111	0	0	0	0	0	3	0	0	low
789	lca-miR-19b_R+2	TGTGCAAATCCATGCAAAACTGAAC	down	-inf	-inf	0.42265	1.74217	0	5.22652	0	0	0	0	0	6	0	0	0	0	0	low
790	mdo-miR-34b-5p_R+2_1ss23TC	AGGCAGTGTAGTTAGCTGATTGCAT	up	inf	inf	0.42265	0	1.58291	0	0	0	0	4.74872	0	0	0	0	0	5	0	low
791	mdo-miR-126-3p_R+3	TCGTACCGTGAGTAATAATGCGACA	down	-inf	-inf	0.42265	1.91556	0	0	0	5.74667	0	0	0	0	0	6	0	0	0	low
792	cpo-miR-130a-3p_L+3	AAACAGTGCAATGTTAAAAGGGCAT	up	inf	inf	0.42265	0	1.74983	0	0	0	0	0	5.24949	0	0	0	0	0	5	low
793	dno-miR-138-5p_R+2	AGCTGGTGTTGTGAATCAGGCCGGA	up	inf	inf	0.42265	0	1.89949	0	0	0	0	5.69846	0	0	0	0	0	6	0	low
794	ptr-miR-203_L-1R+3	TGAAATGTTTAGGACCACTAGAAT	down	-inf	-inf	0.42265	1.45181	0	4.35543	0	0	0	0	0	5	0	0	0	0	0	low
795	mdo-miR-204_R+3	TTCCCTTTGTCATCCTATGCCTGTA	down	-inf	-inf	0.42265	1.45181	0	4.35543	0	0	0	0	0	5	0	0	0	0	0	low
796	bta-miR-361_L+4	GATCTTATCAGAATCTCCAGGGGTAC	down	-inf	-inf	0.42265	0.871087	0	2.61326	0	0	0	0	0	3	0	0	0	0	0	low
797	chi-miR-361-5p_L+4	GATCTTATCAGAATCTCCAGGGGTAC	down	-inf	-inf	0.42265	0.871087	0	2.61326	0	0	0	0	0	3	0	0	0	0	0	low
798	bta-miR-1246_L+1R+2	AAATGGATTTTTGGAGCAGGGA	down	-inf	-inf	0.42265	1.5963	0	0	0	4.78889	0	0	0	0	0	5	0	0	0	low
799	hsa-miR-4508_L+2R-1	AAGCGGGGCTGGGCGCGC	up	inf	inf	0.42265	0	3.48239	0	0	0	0	10.4472	0	0	0	0	0	11	0	middle
800	hsa-miR-4791	TGGATATGATGACTGAAA	up	inf	inf	0.42265	0	1.89949	0	0	0	0	5.69846	0	0	0	0	0	6	0	low
801	PC-3p-43832_6	GATGGAGAGATTGTTCAGCGGT	down	-inf	-inf	0.42265	1.74217	0	5.22652	0	0	0	0	0	6	0	0	0	0	0	low
802	PC-3p-41925_6	ACTTGTGATGAGGTGAGACAGA	down	-inf	-inf	0.42265	1.91556	0	0	0	5.74667	0	0	0	0	0	6	0	0	0	low
803	PC-5p-46151_5	TTTCCCACCTCTCTAATCGGCT	up	inf	inf	0.42265	0	1.58291	0	0	0	0	4.74872	0	0	0	0	0	5	0	low
804	PC-5p-52431_5	CATACATACACGCACACATAAGAA	up	inf	inf	0.42265	0	1.72839	0	0	0	5.18518	0	0	0	0	0	5	0	0	low
805	PC-5p-51568_5	TCAGAAGGTTGGCCATTGGGGA	down	-inf	-inf	0.42265	1.45181	0	4.35543	0	0	0	0	0	5	0	0	0	0	0	low
806	PC-3p-46608_5	TTGCTCTGTCTTCCCAGGTAT	up	inf	inf	0.42265	0	1.74983	0	0	0	0	0	5.24949	0	0	0	0	0	5	low
807	PC-3p-44185_6	TCAGCAACTTGAACAGAGACT	down	-inf	-inf	0.42265	3.51185	0	0	0	10.5356	0	0	0	0	0	11	0	0	0	middle
808	PC-5p-39125_7	TTAGGAGATGGGCTAGGTGTGG	up	inf	inf	0.42265	0	2.21607	0	0	0	0	6.64821	0	0	0	0	0	7	0	low
809	PC-3p-54028_5	TGGGGTAGAGCTATCTGTCTGA	down	-inf	-inf	0.42265	1.5963	0	0	0	4.78889	0	0	0	0	0	5	0	0	0	low
810	PC-3p-52668_5	TTATTGCCGGGCATGGTGGCGC	down	-inf	-inf	0.42265	1.5963	0	0	0	4.78889	0	0	0	0	0	5	0	0	0	low
811	PC-3p-39414_7	TCGCGCGTCTCCGGCCTCGCGCT	up	inf	inf	0.42265	0	2.21607	0	0	0	0	6.64821	0	0	0	0	0	7	0	low
812	PC-5p-51506_5	TGTAGAGATGGGAGAGCTGGG	down	-inf	-inf	0.42265	1.87704	0	0	5.63111	0	0	0	0	0	5	0	0	0	0	low
813	PC-5p-53295_5	TGCCTCTGCGTCGCCTGCTGTA	down	-inf	-inf	0.42265	1.45181	0	4.35543	0	0	0	0	0	5	0	0	0	0	0	low
814	PC-5p-53633_5	CTAGCCGGGCAGATGTGAT	down	-inf	-inf	0.42265	1.45181	0	4.35543	0	0	0	0	0	5	0	0	0	0	0	low
815	PC-3p-47522_5	TCTGCACACCTGGCTCGCCCAT	up	inf	inf	0.42265	0	1.74983	0	0	0	0	0	5.24949	0	0	0	0	0	5	low
816	PC-3p-47817_5	TTGAACTGTCAAGAACCACTGGT	up	inf	inf	0.42265	0	1.58291	0	0	0	0	4.74872	0	0	0	0	0	5	0	low
817	PC-3p-38784_7	CTCCTAGTAGCACTGAAGGTCCT	down	-inf	-inf	0.42265	2.03254	0	6.09761	0	0	0	0	0	7	0	0	0	0	0	low
818	PC-3p-37626_8	TCCCTGGTCACGGGAGTGTGAGA	down	-inf	-inf	0.42265	2.3229	0	6.96869	0	0	0	0	0	8	0	0	0	0	0	low
819	PC-3p-50607_5	GAGGGGAGGGCGCAACCCAGA	down	-inf	-inf	0.42265	1.5963	0	0	0	4.78889	0	0	0	0	0	5	0	0	0	low
820	PC-3p-51683_5	TCCTGAGAGATGGGCGAGTG	down	-inf	-inf	0.42265	1.5963	0	0	0	4.78889	0	0	0	0	0	5	0	0	0	low
821	PC-3p-47266_5	CAGGCACCAGTGAGGTCTCTC	up	inf	inf	0.42265	0	1.58291	0	0	0	0	4.74872	0	0	0	0	0	5	0	low
822	PC-3p-48387_5	GTTGGGAGCAGATAGGCA	up	inf	inf	0.42265	0	1.58291	0	0	0	0	4.74872	0	0	0	0	0	5	0	low
823	PC-3p-53706_5	CAGCCATTCCAGGTCCTCTGC	up	inf	inf	0.42265	0	1.58291	0	0	0	0	4.74872	0	0	0	0	0	5	0	low
824	PC-5p-38441_7	ATAGGTGCAGACTGAGGAG	down	-inf	-inf	0.42265	3.48435	0	10.453	0	0	0	0	0	12	0	0	0	0	0	middle
825	PC-5p-45344_5	CCAGCATCAGTTCTCTAAGT	down	-inf	-inf	0.42265	1.45181	0	4.35543	0	0	0	0	0	5	0	0	0	0	0	low
826	PC-3p-47015_5	TTCTGAGGCCTGGCCTGCTCAGC	down	-inf	-inf	0.42265	1.87704	0	0	5.63111	0	0	0	0	0	5	0	0	0	0	low
827	PC-3p-42596_6	CTGTGACACACCCGCTCCCAGT	up	inf	inf	0.42265	0	2.07407	0	0	0	6.22222	0	0	0	0	0	6	0	0	low
828	PC-3p-49441_5	TTACTCCTGCCCCTCTACTCCAGT	down	-inf	-inf	0.42265	1.87704	0	0	5.63111	0	0	0	0	0	5	0	0	0	0	low
829	PC-3p-39035_7	TCAGCTCCTCTCTCTCCCCAGT	up	inf	inf	0.42265	0	2.21607	0	0	0	0	6.64821	0	0	0	0	0	7	0	low
830	PC-3p-49390_5	TCAGCCATGCTAAGGCCTGCA	down	-inf	-inf	0.42265	1.5963	0	0	0	4.78889	0	0	0	0	0	5	0	0	0	low
831	PC-3p-44769_6	TTTGGCGGGGTATGTGGTTCTCT	down	-inf	-inf	0.42265	2.25244	0	0	6.75733	0	0	0	0	0	6	0	0	0	0	low
832	PC-3p-53930_5	GGGAGTGATGAGATGCTGAGA	down	-inf	-inf	0.42265	1.45181	0	4.35543	0	0	0	0	0	5	0	0	0	0	0	low
833	PC-3p-37984_7	TAACGTGTGAGTGTGTGTTTT	down	-inf	-inf	0.42265	2.03254	0	6.09761	0	0	0	0	0	7	0	0	0	0	0	low
834	PC-3p-33607_11	TGTCTGCCCCCACCCCCACAT	down	-inf	-inf	0.42265	3.19398	0	9.58195	0	0	0	0	0	11	0	0	0	0	0	low
835	PC-5p-45459_5	CACTGGGCTGCTCCCTCTGTGT	up	inf	inf	0.42265	0	1.74983	0	0	0	0	0	5.24949	0	0	0	0	0	5	low
836	PC-3p-47740_5	CTCTCACATCAGCACAAACACAT	down	-inf	-inf	0.42265	1.45181	0	4.35543	0	0	0	0	0	5	0	0	0	0	0	low
837	PC-3p-44521_6	TTCATGTCAGTGAGCCTGTCTC	up	inf	inf	0.42265	0	2.09979	0	0	0	0	0	6.29938	0	0	0	0	0	6	low
838	PC-3p-50851_5	TTCCAGCGTCTGCTGCCCGGGA	down	-inf	-inf	0.42265	1.45181	0	4.35543	0	0	0	0	0	5	0	0	0	0	0	low
839	PC-3p-44657_6	GCAGAGCGGGTAGATCTG	up	inf	inf	0.42265	0	2.09979	0	0	0	0	0	6.29938	0	0	0	0	0	6	low
840	PC-3p-36390_9	TTTGAGGTCTCTGCAGCTCGCT	down	-inf	-inf	0.42265	2.87333	0	0	0	8.62	0	0	0	0	0	9	0	0	0	low
841	PC-3p-53124_5	TCCTGCCGCCCCGGCCCGCTCT	up	inf	inf	0.42265	0	1.58291	0	0	0	0	4.74872	0	0	0	0	0	5	0	low
842	PC-3p-44907_5	ATCACTCTCTGGCCAGAAGTC	down	-inf	-inf	0.42265	1.5963	0	0	0	4.78889	0	0	0	0	0	5	0	0	0	low
843	PC-5p-47358_5	CAGGCCCAGAGAATAGCAAA	up	inf	inf	0.42265	0	1.74983	0	0	0	0	0	5.24949	0	0	0	0	0	5	low
844	PC-3p-43834_6	TGACCTATCCCTGCACCCCAGT	down	-inf	-inf	0.42265	1.91556	0	0	0	5.74667	0	0	0	0	0	6	0	0	0	low
845	PC-5p-47300_5	AGAGAAGGCCGGCCTTGCAGA	up	inf	inf	0.42265	0	1.58291	0	0	0	0	4.74872	0	0	0	0	0	5	0	low
846	PC-3p-41023_6	TTTCTTGTCTTCCACTCTAGT	down	-inf	-inf	0.42265	1.91556	0	0	0	5.74667	0	0	0	0	0	6	0	0	0	low
847	mmu-miR-466h-3p_R+2	TACGCACGCACACACACACAA	up	1.32067	0.401271	0.425036	8.947	11.816	12.1952	5.068	9.57778	7.77777	11.3969	16.2734	14	4.5	10	7.5	12	15.5	middle
848	mmu-miR-365-3p	TAATGCCCCTAAAAATCCTTAT	up	1.07204	0.100361	0.426274	4058.44	4350.82	3770.5	3988.51	4416.31	4166.29	4875.04	4011.13	4328.5	3541.5	4611	4017.5	5133	3820.5	middle
849	mdo-miR-181a-5p_R+3_2	AACATTCAACGCTGTCGGTGAGTTTT	down	0.941308	-0.0872608	0.426887	1013.03	953.57	1087.99	1022.05	929.045	986.74	857.144	1016.83	1249	907.5	970	951.5	902.5	968.5	middle
850	mdo-miR-181a-5p_R+3_1	AACATTCAACGCTGTCGGTGAGTTAT	down	0.941308	-0.0872608	0.426887	1013.03	953.57	1087.99	1022.05	929.045	986.74	857.144	1016.83	1249	907.5	970	951.5	902.5	968.5	middle
851	hsa-miR-450a-5p_1ss6CT	TTTTGTGATGTGTTCCTAATAT	up	1.11232	0.153566	0.427671	79.8482	88.8163	76.6556	90.0977	72.7911	93.3332	100.673	72.4429	88	80	76	90	106	69	middle
852	mmu-miR-450b-5p_R+1	TTTTGCAGTATGTTCCTGAATAC	down	0.890557	-0.16722	0.4281	8797.16	7834.38	7714.34	10300.4	8376.73	9298.06	7517.22	6687.85	8856	9146	8746	8966	7915	6370	high
853	mmu-miR-374c-5p	ATAATACAACCTGCTAAGTG	up	1.1699	0.226388	0.428145	19.0027	22.2314	15.244	23.0875	18.6767	25.9259	16.6205	24.1476	17.5	20.5	19.5	25	17.5	23	middle
854	mmu-miR-467c-5p	TAAGTGCGTGCATGTATATGTG	down	0.961225	-0.0570543	0.429248	2243.74	2156.73	2176.15	2239.15	2315.91	2321.92	2113.37	2034.91	2498.2	1988.2	2418	2239	2225.2	1938.2	middle
855	sha-miR-125a_R+2_2	TCCCTGAGACCCTAACTTGTGAGA	down	0.420344	-1.25036	0.429359	4.11185	1.72839	0	5.63111	6.70445	5.18518	0	0	0	5	7	5	0	0	low
856	sha-miR-125a_R+2_1	TCCCTGAGACCCTAACTTGTGAAA	down	0.420344	-1.25036	0.429359	4.11185	1.72839	0	5.63111	6.70445	5.18518	0	0	0	5	7	5	0	0	low
857	mmu-miR-7667-5p	GAGCCATCTCTCTAGCCCCTGA	down	0.835217	-0.259777	0.43702	12.5486	10.4808	15.6796	12.3884	9.57778	8.29629	9.49744	13.6487	18	11	10	8	10	13	middle
858	mmu-let-7e-5p	TGAGGTAGGAGGTTGTATAGTT	up	1.15425	0.206958	0.437433	48044.3	55455.2	43453.6	51009.7	49669.5	62804.1	63359.3	40202.2	49884.4	45292.8	51859.1	60561.2	66711.9	38291.5	high
859	mmu-miR-484	TCAGGCTCAGTCCCCTCCCGAT	down	0.957697	-0.0623581	0.438448	22516.6	21564.1	22611.7	22388.2	22549.9	19614.5	22218.3	22859.4	25958	19879	23544	18914	23394	21773	high
860	mml-let-7a-5p_L+2	TCTGAGGTAGTAGGTTGTATAGTT	up	1.24904	0.320824	0.439076	43.0846	53.8146	35.279	55.1848	38.79	68.9629	58.8841	33.5967	40.5	49	40.5	66.5	62	32	middle
861	mmu-miR-297c-3p_1ss22AT	TATACATACACACATACCCATT	down	0.654257	-0.612071	0.440037	8.72888	5.71093	9.14641	5.068	11.9722	3.11111	11.3969	2.62474	10.5	4.5	12.5	3	12	2.5	middle
862	cpo-miR-424-5p_L+1R-1	GCAGCAGCAATTCATGTTTTGA	down	0.698523	-0.51762	0.442677	35.1517	24.5543	17.4217	50.68	37.3533	38.3703	23.7436	11.5489	20	45	39	37	25	11	middle
863	mmu-miR-483-5p	AAGACGGGAGAAGAGAAGGGAG	down	0.954435	-0.0672816	0.443271	9704.09	9261.92	9956.52	9510.94	9644.82	8338.81	9779.51	9667.45	11430	8445	10070	8041	10297	9208	high
864	mmu-miR-451a_R-1	AAACCGTTACCATTACTGAGT	down	0.278668	-1.84338	0.443969	25.117	6.99931	0	61.9422	13.4089	0	0	20.9979	0	55	14	0	0	20	middle
865	mmu-miR-1933-3p	CCAGGACCATCAGTGTGACTAT	up	2.40311	1.26491	0.445077	2.3229	5.58219	6.96869	0	0	0	10.4472	6.29938	8	0	0	0	11	6	middle
866	mmu-miR-669a-5p	AGTTGTGTGTGCATGTTCATGTCT	down	0.916199	-0.126266	0.445637	1283.96	1176.36	1167.04	1472.53	1212.31	1331.85	1154.85	1042.39	1339.75	1307.5	1265.75	1284.29	1215.96	992.845	middle
867	mmu-miR-3081-3p	TTGCGCTCCGATCTCTGAGCTGG	up	2.30703	1.20604	0.448429	1.5963	3.6827	0	0	4.78889	0	4.74872	6.29938	0	0	5	0	5	6	low
868	pal-miR-9226-5p_1ss4AC	TCACGTCCCTGTTCGGGCGCCA	up	1.30265	0.381454	0.448447	5.24757	6.83577	6.53315	3.94177	5.26778	7.25925	3.79898	9.44907	7.5	3.5	5.5	7	4	9	low
869	mmu-miR-7a-5p_R+1	TGGAAGACTAGTGATTTTGTTGTT	down	0.890948	-0.166587	0.449051	4843.87	4315.64	4382.87	5533.69	4615.05	5278.17	4140.57	3528.18	5031.5	4913.5	4818.5	5089.67	4359.67	3360.5	middle
870	mmu-miR-34a-3p_R+1	AATCAGCAAGTATACTGCCCTA	down	0.768927	-0.379082	0.449252	26.6263	20.4737	20.9061	29.2818	29.6911	13.4815	33.241	14.6986	24	26	31	13	35	14	middle
871	mmu-miR-6933-5p	TGGCGGCAGTCAGGATACCTGT	down	0.404571	-1.30553	0.449971	4.32514	1.74983	4.35543	0	8.62	0	0	5.24949	5	0	9	0	0	5	low
872	mmu-miR-483-3p_L-1R+2	CACTCCTCCCCTCCCGTCTTGT	down	0.960734	-0.0577916	0.450021	17183.2	16508.5	18474.9	17007.1	16067.7	15863.5	16784.8	16877.1	21209	15101	16776	15297	17673	16075	high
873	mmu-let-7a-5p	TGAGGTAGTAGGTTGTATAGTT	up	1.09205	0.127035	0.450382	40300.6	44010.2	37729.5	42902.8	40269.6	48507.1	47300.2	36223.2	43313.1	38094.5	42044.8	46774.8	49803.2	34501.6	high
874	mmu-miR-8115	CCGCAATAGCAACAAGGGCTCT	down	0.894037	-0.161594	0.451016	43.3413	38.7487	38.3278	49.5537	42.1422	31.1111	38.9395	46.1955	44	44	44	30	41	44	middle
875	PC-3p-27981_17	TGCGCCTCCAGGGCTTTGCTGC	down	0.442093	-1.17758	0.451467	3.90957	1.72839	6.09761	5.63111	0	5.18518	0	0	7	5	0	5	0	0	low
876	rno-miR-6328_R+1_1ss17CT	AGGCCTGCTCTGAGCCTCCGCC	down	0.38765	-1.36717	0.452468	5.35037	2.07407	0	11.2622	4.78889	6.22222	0	0	0	10	5	6	0	0	middle
877	pal-miR-450a-5p_R+3	TTTTGCGATGTGTTCCTAATATGCT	down	0.391137	-1.35425	0.458944	7.954	3.11111	6.96869	16.8933	0	9.33332	0	0	8	15	0	9	0	0	middle
878	mmu-miR-29a-5p_R+3	ACTGATTTCTTTTGGTGTTCAGAGT	up	1.15704	0.210445	0.461967	187.494	216.939	152.44	218.487	191.556	272.74	207.994	170.083	175	194	200	263	219	162	middle
879	cfa-miR-194_R+1	TGTAACAGCAACTCCATGTGGAT	down	0.865243	-0.208822	0.462652	49.1149	42.4963	54.0074	34.9129	58.4245	47.7037	39.8892	39.8961	62	31	61	46	42	38	middle
880	mmu-miR-1943-3p	CAGGTGCCAGCTCCTCCCTTC	up	1.04069	0.0575369	0.463104	164.939	171.65	177.702	154.292	162.822	171.111	164.306	179.532	204	137	170	165	173	171	middle
881	cja-miR-9933_L-4_1ss12AT	ATCACCCTTGACTGATGGCT	up	1.27108	0.346058	0.465242	24.4291	31.0514	27.4392	24.7769	21.0711	18.6666	30.3918	44.0957	31.5	22	22	18	32	42	middle
882	efu-miR-9226_1ss22GA	TCAAGTCCCTGTTCGGGCGCCA	up	1.07615	0.10588	0.466259	1242.11	1336.69	1379.37	1152.12	1194.83	1172.89	1340.56	1496.63	1583.5	1023	1247.5	1131	1411.5	1425.5	middle
883	pal-miR-9226-5p	TCAAGTCCCTGTTCGGGCGCCA	up	1.07615	0.10588	0.466259	1242.11	1336.69	1379.37	1152.12	1194.83	1172.89	1340.56	1496.63	1583.5	1023	1247.5	1131	1411.5	1425.5	middle
884	mmu-miR-3079-5p_R+3	TTTGATCTGATGAGCTAAGCTGGAGT	down	0.450562	-1.1502	0.466361	9.32077	4.19959	12.1952	15.7671	0	0	0	12.5988	14	14	0	0	0	12	middle
885	bta-miR-11987_L-1R-1_1ss8TA	GAGGAAACTCTGGTGGAGG	down	0.285122	-1.81035	0.470011	6.45812	1.84135	2.61326	0	16.7611	0	2.37436	3.14969	3	0	17.5	0	2.5	3	middle
886	mmu-miR-5621-3p	TGGGCCCTCCAGACCTCATGC	up	1.51715	0.601363	0.470848	6.36733	9.66019	7.83978	11.2622	0	5.18518	13.2964	10.499	9	10	0	5	14	10	middle
887	eca-miR-296_R-3	GAGGGTTGGGTGGAGGCTT	up	1.23937	0.309603	0.47214	30.0319	37.2206	36.5856	24.7769	28.7333	25.9259	33.241	52.4949	42	22	30	25	35	50	middle
888	bta-miR-11987_L-2R-1_1ss8TA	AGGAAACTCTGGTGGAGG	down	0.24607	-2.02286	0.473339	7.11109	1.74983	2.17772	0	19.1556	0	0	5.24949	2.5	0	20	0	0	5	middle
889	mmu-miR-466h-5p_R+4	TGTGTGCATGTGCTTGTGTGTATGTT	up	2.19718	1.13565	0.473798	1.12622	2.47451	0	3.37866	0	0	4.27385	3.14969	0	3	0	0	4.5	3	low
890	mmu-miR-217-5p_R-1	TACTGCATCAGGAACTGACTGG	down	0.58385	-0.77633	0.474157	12.4701	7.28069	9.58195	6.75733	21.0711	16.5926	0	5.24949	11	6	22	16	0	5	middle
891	mmu-miR-297c-5p_1ss16TA	ATGTATGTGTGCATGAACATGT	down	0.916143	-0.126356	0.47417	148.115	135.694	145.471	128.389	170.484	153.481	133.914	119.688	167	114	178	148	141	114	middle
892	mmu-miR-21a-3p_R-1	CAACAGCAGTCGATGGGCTGT	down	0.940389	-0.0886706	0.479377	957.581	900.499	1005.23	857.054	1010.46	829.629	867.116	1004.75	1154	761	1055	800	913	957	middle
893	mmu-miR-3473d_L-1	CACTGAGCCACTTTCCAGCCCTT	up	1.19151	0.252791	0.484823	45.7957	54.566	47.0387	40.544	49.8045	34.2222	66.4821	62.9938	54	36	52	33	70	60	middle
894	mmu-miR-19a-3p	TGTGCAAATCTATGCAAAACTGA	down	0.825712	-0.27629	0.486253	585.893	483.779	411.588	735.986	610.105	671.481	400.317	379.538	472.5	653.5	637	647.5	421.5	361.5	middle
895	mmu-miR-669o-5p_R+1	TAGTTGTGTGTGCATGTTTATGTA	up	2.11693	1.08198	0.486587	0.938518	1.98678	0	2.81555	0	3.11111	2.84923	0	0	2.5	0	3	3	0	low
896	mmu-miR-128-3p	TCACAGTGAACCGGTCTCTTT	down	0.943028	-0.0846268	0.486626	2260.24	2131.47	2177.28	2381.4	2222.04	2154.96	2374.83	1864.62	2499.5	2114.5	2320	2078	2500.5	1776	middle
897	mmu-miR-146b-5p_R+2	TGAGAACTGAATTCCATAGGCTGT	down	0.969395	-0.0448428	0.490573	3348.68	3246.2	3323.63	3152.29	3570.12	3304.52	3193.04	3241.03	3815.5	2799	3727.5	3186.5	3362	3087	middle
898	PC-3p-33547_11	GCAGGCCTCGGGGCGGGCTAGT	up	2.11385	1.07988	0.493156	1.74217	3.6827	5.22652	0	0	0	4.74872	6.29938	6	0	0	0	5	6	low
899	mmu-miR-3084-5p	GTTGAAGGTTAATTAGCAGAGT	up	2.15705	1.10906	0.494815	2.3229	5.0106	6.96869	0	0	9.33332	5.69846	0	8	0	0	9	6	0	low
900	mmu-miR-547-3p_R+1	CTTGGTACATCTTTGAGTGAGT	down	0.476295	-1.07007	0.495195	3.62883	1.72839	6.09761	0	4.78889	5.18518	0	0	7	0	5	5	0	0	low
901	mmu-miR-23b-5p	GGGTTCCTGGCATGCTGATTT	down	0.867722	-0.204695	0.499596	74.1224	64.3176	76.6556	77.7093	68.0022	86.074	61.7334	45.1456	88	69	71	83	65	43	middle
902	mmu-miR-204-5p	TTCCCTTTGTCATCCTATGCCT	up	1.07815	0.108562	0.500315	58.707	63.2952	54.0074	60.816	61.2978	59.111	74.08	56.6944	62	54	64	57	78	54	middle
903	hsa-miR-450a-1-3p_L+1R-2	TATTGGGAACATTTTGCATGT	down	0.472384	-1.08197	0.50088	3.70425	1.74983	4.35543	6.75733	0	0	0	5.24949	5	6	0	0	0	5	low
904	mmu-miR-1966-3p_R+1	TTTCTGACTCAACTCTCCCTTAGT	down	0.485856	-1.0414	0.502287	3.90957	1.89949	6.09761	5.63111	0	0	5.69846	0	7	5	0	0	6	0	low
905	mmu-miR-1945	TCTTCGCGGGTACTGTCGGGAC	down	0.659592	-0.600354	0.502606	8.98085	5.92369	4.35543	10.136	12.4511	6.22222	0	11.5489	5	9	13	6	0	11	middle
906	mdo-miR-22-3p	AAGCTGCCAGTTGAAGAACTGC	up	1.18123	0.240285	0.502815	23.0567	27.2351	22.6483	29.2818	17.24	18.6666	29.4421	33.5967	26	26	18	18	31	32	middle
907	mmu-miR-6240_R-6_1ss1CA	ACAAAGCATCGCGAAGGCCC	up	1.54739	0.629839	0.50347	75.3748	116.634	35.7145	37.1653	153.244	64.2962	89.2759	196.331	41	33	160	62	94	187	middle
908	mmu-miR-6960-5p_L+1	GCAGGATGAGAAGAGTTTGGCTG	up	2.28375	1.1914	0.506827	6.09761	13.9254	18.2928	0	0	5.18518	31.3415	5.24949	21	0	0	5	33	5	middle
909	mmu-miR-24-2-5p	GTGCCTACTGAGCTGAAACAGT	down	0.93606	-0.095327	0.506853	2974.71	2784.51	2912.91	2799.79	3211.43	3227.26	2522.52	2603.75	3344	2486	3353	3112	2656	2480	middle
910	mmu-miR-7647-5p	AACTACCACCTCCTGGCCTTTT	up	1.23198	0.300977	0.507345	5.2444	6.46099	4.35543	5.63111	5.74667	5.18518	4.74872	9.44907	5	5	6	5	5	9	low
911	mmu-miR-107-5p	AGCTTCTTTACAGTGTTGCCTTG	up	1.13137	0.178068	0.510041	19.7165	22.3066	22.6483	13.5147	22.9867	21.7778	19.9446	25.1975	26	12	24	21	21	24	middle
912	mmu-miR-378a-5p	CTCCTGACTCCAGGTCCTGTGT	up	1.04577	0.0645664	0.511471	1644.97	1720.26	1776.15	1633.02	1525.74	1602.22	1698.14	1860.42	2039	1450	1593	1545	1788	1772	middle
913	mmu-miR-9-5p	TCTTTGGTTATCTAGCTGTATGA	down	0.943346	-0.0841414	0.512172	1080.99	1019.75	1014.82	1155.13	1073.03	1140.39	1028.89	889.963	1165	1025.67	1120.33	1099.67	1083.33	847.667	middle
914	mmu-let-7g-5p	TGAGGTAGTAGTTTGTACAGTT	down	0.919281	-0.121421	0.5159	41955.4	38568.9	39030.9	47142.1	39693.3	45087.5	39036.5	31582.6	44807.2	41858.7	41443.1	43477.2	41102.2	30081.6	high
915	pal-miR-9226-5p_L-4_1ss15GA	GTCCCTGTTCAGGCGCCA	down	0.490047	-1.02901	0.516175	7.05399	3.45679	8.71087	0	12.4511	10.3704	0	0	10	0	13	10	0	0	middle
916	bta-miR-11987_L-1R-2_1ss8TA	GAGGAAACTCTGGTGGAG	down	0.40797	-1.29346	0.516312	5.24852	2.14124	0	2.81555	12.93	0	3.79898	2.62474	0	2.5	13.5	0	4	2.5	middle
917	mmu-miR-3084-3p	TTCTGCCAGTCTCCTTCAGAC	down	0.699062	-0.516507	0.517147	7.04272	4.9233	9.58195	6.75733	4.78889	6.22222	8.5477	0	11	6	5	6	9	0	low
918	mmu-miR-1955-5p_R-2	AGTCCCAGGATGCACTGCAGCTT	down	0.856953	-0.222712	0.517894	71.3261	61.1231	76.6556	66.4471	70.8756	48.7407	47.4872	87.1415	88	59	74	47	50	83	middle
919	mmu-miR-10b-5p_R-1	TACCCTGTAGAACCGAATTTGT	down	0.948316	-0.0765601	0.519285	91804.7	87059.9	84719.3	91543.8	99151.1	94890.9	89163.9	77124.9	97257	81284	103522	91502	93882	73459.5	high
920	PC-5p-12723_64	GGAGTACCACCATACACAGCT	down	0.755702	-0.404111	0.522309	19.1826	14.4963	8.71087	19.1458	29.6911	12.4444	14.2462	16.7984	10	17	31	12	15	16	middle
921	mmu-miR-669d-5p_R+1_1	ACTTGTGTGTGCATGTATATGTA	up	1.03944	0.0558118	0.525421	28.9917	30.1353	27.4392	29.8449	29.6911	32.6666	29.9169	27.8223	31.5	26.5	31	31.5	31.5	26.5	middle
922	mmu-miR-669d-5p_R+1_2	ACTTGTGTGTGCATGTATATGTT	up	1.03944	0.0558118	0.525421	28.9917	30.1353	27.4392	29.8449	29.6911	32.6666	29.9169	27.8223	31.5	26.5	31	31.5	31.5	26.5	middle
923	mmu-miR-297c-3p_L+1R-1_1ss22TA	ATATACATACACACATACCCAA	up	1.87379	0.905955	0.525901	1.99731	3.74253	2.61326	3.37866	0	3.62963	7.59795	0	3	3	0	3.5	8	0	low
924	mmu-miR-98-3p	CTATACAACTTACTACTTTCCT	up	1.16309	0.217963	0.528558	59.1678	68.8175	38.3278	78.8355	60.34	77.7777	74.08	54.5947	44	70	63	75	78	52	middle
925	mmu-miR-214-3p	ACAGCAGGCACAGACAGGCAGT	down	0.936293	-0.0949687	0.532683	260.973	244.347	303.138	236.506	243.276	225.037	260.23	247.776	348	210	254	217	274	236	middle
926	mmu-miR-497b_L-1	ACCACAGTGTGGTTTGGACGTGG	up	4.04773	2.01711	0.533556	1.45181	5.87654	4.35543	0	0	17.6296	0	0	5	0	0	17	0	0	middle
927	mmu-miR-1251-5p	ACTCTAGCTGCCAAAGGCGCT	down	0.710144	-0.493816	0.537064	12.2054	8.66757	11.3241	9.00977	16.2822	15.5555	10.4472	0	13	8	17	15	11	0	middle
928	mmu-miR-883a-3p_R+1	TAACTGCAACAGCTCTCAGTATT	down	0.836839	-0.256979	0.53988	36.6017	30.6297	32.6657	35.476	41.6633	42	34.6657	15.2235	37.5	31.5	43.5	40.5	36.5	14.5	middle
929	tch-let-7a-5p	TAAGGTAGTAGATTGTATAGTT	up	1.94066	0.956548	0.540874	2.03254	3.94446	6.09761	0	0	5.18518	6.64821	0	7	0	0	5	7	0	low
930	mmu-miR-669c-3p_L-1R+2	ACACACACACACACAAGTAAACT	down	0.595686	-0.747375	0.542351	3.32885	1.98295	4.35543	5.63111	0	0	3.3241	2.62474	5	5	0	0	3.5	2.5	low
931	mmu-miR-669o-5p	TAGTTGTGTGTGCATGTTTATGT	up	1.07876	0.109378	0.543514	614.617	663.026	608.018	680.801	555.032	779.333	639.653	570.094	698	604.5	579.5	751.5	673.5	543	middle
932	mmu-miR-130b-3p	CAGTGCAATGATGAAAGGGCAT	down	0.959275	-0.0599844	0.544892	151.639	145.463	151.569	139.088	164.259	144.667	135.813	155.91	174	123.5	171.5	139.5	143	148.5	middle
933	mmu-miR-466h-3p_R+1	TACGCACGCACACACACACT	down	0.8952	-0.159717	0.5459	7.53372	6.74419	6.09761	7.88355	8.62	5.18518	6.64821	8.39918	7	7	9	5	7	8	low
934	hsa-miR-320d	AAAAGCTGGGTTGAGAGGA	down	0.512786	-0.963572	0.54644	1.85213	0.949744	2.17772	3.37866	0	0	2.84923	0	2.5	3	0	0	3	0	low
935	PC-3p-27023_18	TGTGTGTAAGGGTCCTGTCAAT	down	0.515237	-0.956691	0.548802	3.68663	1.89949	4.35543	0	6.70445	0	5.69846	0	5	0	7	0	6	0	low
936	PC-3p-15961_45	TCTGGAGGCACATGGTTTGAAT	down	0.894323	-0.161132	0.548974	7.85298	7.0231	6.09761	7.88355	9.57778	6.22222	8.5477	6.29938	7	7	10	6	9	6	low
937	pal-miR-9993b-3p	ATCTCGCTGGGGCCTCCA	down	0.95283	-0.069709	0.549624	475.748	453.307	497.39	511.305	418.549	418.444	470.598	470.879	571	454	437	403.5	495.5	448.5	middle
938	mmu-miR-146b-3p	GCCCTAGGGACTCAGTTCTGGT	up	1.76921	0.823105	0.550226	3.79259	6.70989	0	5.63111	5.74667	13.4815	6.64821	0	0	5	6	13	7	0	middle
939	mmu-miR-99b-5p	CACCCGTAGAACCGACCTTGCG	up	1.04243	0.0599514	0.550318	454063	473329	471387	427522	463280	424264	486379	509344	541148	379607	483703	409112	512116	485137	high
940	mmu-miR-5123_L+1R-3	GTGTAGATCCATATGCCATGGT	down	0.719665	-0.474603	0.551636	25.1855	18.1251	30.488	6.75733	38.3111	9.33332	20.8944	24.1476	35	6	40	9	22	23	middle
941	mmu-miR-30b-5p	TGTAAACATCCTACACTCAGCT	down	0.924774	-0.112827	0.55498	88752.6	82076.1	77468.3	83869.3	104920	93773.3	79253	73202	88933	74469.7	109545	90424.3	83446.7	69723	high
942	bta-miR-11987_L-1_1ss8TA	GAGGAAACTCTGGTGGAGGT	down	0.34313	-1.54317	0.55631	16.0504	5.50736	2.17772	0	45.9733	0	7.59795	8.92413	2.5	0	48	0	8	8.5	middle
943	mdo-miR-219-5p_R+3	TGATTGTCCAAACGCAATTCTCGT	up	1.25906	0.33235	0.558086	4.06768	5.12147	2.17772	6.19422	3.83111	6.74073	2.84923	5.77443	2.5	5.5	4	6.5	3	5.5	low
944	mmu-miR-467e-5p	ATAAGTGTGAGCATGTATATGT	up	1.06428	0.0898723	0.559122	1697.22	1806.31	1581.02	1811.53	1699.1	2063.18	1814.49	1541.25	1815	1608.5	1774	1989.5	1910.5	1468	middle
945	mmu-miR-1187_L-1_1ss23AT	ATGTGTGTGTGTATGTGTGTAT	up	1.0579	0.0811973	0.562602	21.6763	22.9312	18.7284	21.3982	24.9022	23.8518	21.8441	23.0977	21.5	19	26	23	23	22	middle
946	hsa-miR-378c_R-2_2ss21AG22GC	ACTGGACTTGGAGTCAGAAGGCT	down	0.947224	-0.0782221	0.564967	1162.52	1101.16	1172.48	1095.81	1219.25	988.295	1043.77	1271.43	1346	973	1273	953	1099	1211	middle
947	mmu-miR-200c-3p	TAATACTGCCGGGTAATGATGGA	down	0.881579	-0.181838	0.566395	95.9279	84.568	87.1087	125.011	75.6645	80.8888	103.522	69.2932	100	111	79	78	109	66	middle
948	mmu-miR-139-3p_R+1	TGGAGACGCGGCCCTGTTGGAGT	up	1.07193	0.100204	0.566871	1095.97	1174.79	1193.39	959.541	1134.97	1018.37	1135.89	1370.12	1370	852	1185	982	1196	1305	middle
949	mmu-miR-330-3p_L-1	CAAAGCACAGGGCCTGCAGAGA	up	1.06905	0.0963288	0.56921	546.271	583.991	628.053	507.926	502.833	541.333	536.605	674.034	721	451	525	522	565	642	middle
950	PC-3p-20336_31	TCCCACCGCTGCCACCAAGA	up	1.59747	0.67579	0.570825	3.91919	6.2608	6.96869	0	4.78889	9.33332	0	9.44907	8	0	5	9	0	9	low
951	mmu-miR-301a-3p	CAGTGCAATAGTATTGTCAAAGC	up	1.12812	0.173917	0.572074	1189.55	1341.95	936.418	1480.98	1151.25	1721.48	1166.29	1138.09	1075	1315	1202	1660	1228	1084	middle
952	mmu-miR-450a-1-3p_2ss19AG20AC	ATTGGGAACATTTTGCATGCAT	down	0.962506	-0.0551329	0.572254	6040.06	5813.59	5841.51	5747.11	6531.57	6321.25	5734.08	5385.45	6706	5103	6819.5	6095.5	6037.5	5129.5	middle
953	mmu-miR-450b-3p	ATTGGGAACATTTTGCATGCAT	down	0.962506	-0.0551329	0.572254	6040.06	5813.59	5841.51	5747.11	6531.57	6321.25	5734.08	5385.45	6706	5103	6819.5	6095.5	6037.5	5129.5	middle
954	hsa-miR-10527-5p_R+1_1ss1AG	GAAGCAAATGTTGGGTGAACGGCT	down	0.930466	-0.103975	0.572411	12.316	11.4596	13.0663	12.3884	11.4933	9.33332	11.3969	13.6487	15	11	12	9	12	13	middle
955	PC-3p-6709_158	TTTCCATCTGTCATCCTGCAGT	up	1.15	0.201632	0.573099	25.5593	29.3931	28.7459	25.9031	22.0289	20.7407	27.5426	39.8961	33	23	23	20	29	38	middle
956	mmu-mir-5123-p5	TGTAGATCCATATGCCATGGTGT	up	1.33742	0.419447	0.573354	5.53147	7.39787	8.71087	7.88355	0	8.29629	7.59795	6.29938	10	7	0	8	8	6	low
957	mmu-miR-676-3p	CCGTCCTGAGGTTGTTGAGCT	down	0.918343	-0.122896	0.575627	1015.91	932.957	1143.74	992.201	911.805	720.74	962.091	1116.04	1313	881	952	695	1013	1063	middle
958	mmu-miR-466h-5p	TGTGTGCATGTGCTTGTGTGTA	up	1.18244	0.24177	0.576783	15.1211	17.8798	14.8085	18.5827	11.9722	22.2963	21.3692	9.97402	17	16.5	12.5	21.5	22.5	9.5	middle
959	mmu-miR-100-3p_L-1	CAAGCTTGTGTCTATAGGTAT	up	1.25942	0.332757	0.577872	11.3214	14.2583	11.3241	16.8933	5.74667	13.4815	20.8944	8.39918	13	15	6	13	22	8	middle
960	PC-3p-24097_22	CCTTCCCCCCCTCTGGCCTAGT	up	1.91099	0.934323	0.579835	2.90362	5.5488	8.71087	0	0	0	11.3969	5.24949	10	0	0	0	12	5	middle
961	mmu-miR-669f-3p_R+1	CATATACATACACACACACGTATT	down	0.719498	-0.474938	0.583419	5.09523	3.66601	2.61326	7.88355	4.78889	0	5.22359	5.77443	3	7	5	0	5.5	5.5	low
962	mmu-miR-3110-5p	TTCTGCCTCCCCTGAAGGCTC	down	0.913708	-0.130195	0.583936	112.912	103.168	141.987	92.3502	104.398	100.592	99.7231	109.189	163	82	109	97	105	104	middle
963	cgr-miR-1260_1ss3CA	ATACCACCGCTGCCACCA	up	1.6318	0.706468	0.584907	2.88215	4.7031	0	3.37866	5.26778	5.18518	0	8.92413	0	3	5.5	5	0	8.5	low
964	mmu-miR-467a-3p_L-1R+1	ATATACATACACACACCTACAC	down	0.962574	-0.05503	0.588116	1602.32	1542.35	1501.45	1530.03	1775.48	1469.89	1522.15	1635	1723.65	1358.55	1853.75	1417.4	1602.7	1557.3	middle
965	pal-miR-9226-5p_L-3_1ss4AC	CGTCCCTGTTCGGGCGCCA	up	1.21639	0.282605	0.588462	6.10751	7.42911	4.35543	10.136	3.83111	8.81481	6.64821	6.82433	5	9	4	8.5	7	6.5	middle
966	mmu-miR-219a-5p_R+2	TGATTGTCCAAACGCAATTCTCG	down	0.834296	-0.261369	0.58982	84.5474	70.5375	64.4604	125.011	64.1711	93.3332	53.1857	65.0936	74	111	67	90	56	62	middle
967	mdo-miR-34b-5p	AGGCAGTGTAGTTAGCTGATTGT	up	1.09434	0.130063	0.596183	37.0203	40.5129	37.0212	37.1653	36.8744	49.7777	41.3139	30.447	42.5	33	38.5	48	43.5	29	middle
968	mmu-miR-466h-5p_R+2_2	TGTGTGCATGTGCTTGTGTGTATT	down	0.951377	-0.0719104	0.598001	475.449	452.331	454.707	547.344	424.296	459.407	438.782	458.805	522	486	443	443	462	437	middle
969	mmu-miR-466h-5p_R+2_1	TGTGTGCATGTGCTTGTGTGTATG	down	0.951377	-0.0719104	0.598001	475.449	452.331	454.707	547.344	424.296	459.407	438.782	458.805	522	486	443	443	462	437	middle
970	mmu-miR-1981-3p_R+1	CATCTAACCCTGGCCTTTGACA	down	0.923803	-0.114343	0.598151	272.196	251.455	285.716	257.905	272.967	230.222	316.265	207.88	328	229	285	222	333	198	middle
971	mmu-miR-324-3p_L-2R+3	ACTGCCCCAGGTGCTGCTGGT	up	1.03119	0.0443102	0.605437	1138.38	1173.89	1152.45	1155.5	1107.19	1058.81	1236.57	1226.28	1323	1026	1156	1021	1302	1168	middle
972	cgr-miR-1260_R+2_1ss9GA	ATCCCACCACTGCCACCAAA	up	1.18611	0.246238	0.605608	9.64565	11.4408	13.5018	3.94177	11.4933	9.85184	11.8718	12.5988	15.5	3.5	12	9.5	12.5	12	middle
973	age-miR-27a_L+3R-1	ATCTTCACAGTGGCTAAGTTCCGC	up	1.22496	0.29273	0.606213	5.10087	6.24834	2.17772	4.50489	8.62	6.22222	5.69846	6.82433	2.5	4	9	6	6	6.5	low
974	mmu-miR-148a-3p	TCAGTGCACTACAGAACTTTGT	up	1.05245	0.0737506	0.607747	34059.4	35845.8	31398.8	35596.5	35183	41396.9	33814.7	32325.8	36045.5	31607	36734	39918.5	35604	30789.5	high
975	mmu-miR-196b-3p_R+1	TCGACAGCACGACACTGCCTTCA	down	0.906596	-0.141468	0.609105	139.924	126.854	134.147	148.661	136.962	168	94.9744	117.588	154	132	143	162	100	112	middle
976	mmu-miR-5116_L+1	TTTTGATAGGAACCCCGCCTGA	down	0.621302	-0.686635	0.612996	10.7005	6.64821	14.8085	6.75733	10.5356	0	19.9446	0	17	6	11	0	21	0	middle
977	bta-miR-11987_L-2_1ss8TA	AGGAAACTCTGGTGGAGGT	down	0.398129	-1.32869	0.613154	8.14111	3.24121	0	0	24.4233	0	2.37436	7.34928	0	0	25.5	0	2.5	7	middle
978	PC-3p-32660_12	GATTGGGAGGTGGCTCAGAAGT	up	1.75753	0.813552	0.614202	3.75407	6.5979	0	11.2622	0	12.4444	0	7.34928	0	10	0	12	0	7	middle
979	mmu-miR-1953_R+1	TGGGAAAGTTCTCAGGCTTCTGT	up	1.31974	0.400255	0.617653	9.43468	12.4513	13.9374	0	14.3667	7.25925	13.2964	16.7984	16	0	15	7	14	16	middle
980	cja-miR-151_R+2	TCGAGGAGCTCACAGTCTAGCA	up	1.09343	0.128867	0.618561	29.2822	32.0182	22.6483	29.2818	35.9167	36.8148	25.6431	33.5967	26	26	37.5	35.5	27	32	middle
981	mmu-miR-130b-5p	ACTCTTTCCCTGTTGCACTACT	down	0.909364	-0.137071	0.619169	41.8542	38.0607	30.488	52.9324	42.1422	36.2963	37.9898	39.8961	35	47	44	35	40	38	middle
982	mmu-let-7e-3p	CTATACGGCCTCCTAGCTTTCC	up	1.04136	0.0584717	0.620262	1350.63	1406.5	1423.36	1315.43	1313.11	1220.59	1499.65	1499.25	1634	1168	1371	1177	1579	1428	middle
983	hsa-miR-320b_R+1	AAAAGCTGGGTTGAGAGGGCAAT	up	1.19582	0.258002	0.624317	30.9157	36.9696	47.9098	18.0195	26.8178	25.9259	50.3364	34.6466	55	16	28	25	53	33	middle
984	mmu-miR-466l-3p_R+1	TATAAATACATGCACACATATTC	up	1.69808	0.763903	0.626518	2.3229	3.94446	6.96869	0	0	5.18518	6.64821	0	8	0	0	5	7	0	low
985	mmu-miR-3062-5p	GGAGAATGTAGTGTTACCGTGA	down	0.836963	-0.256764	0.630808	18.2003	15.233	27.0037	18.0195	9.57778	19.7037	12.3467	13.6487	31	16	10	19	13	13	middle
986	mmu-miR-455-5p_R+1	TATGTGCCTTTGGACTACATCGT	down	0.808878	-0.306006	0.63175	20.0647	16.2299	18.2928	30.408	11.4933	8.29629	15.1959	25.1975	21	27	12	8	16	24	middle
987	cgr-miR-1260_1ss15AC	ATCCCACCGCTGCCCCCA	up	2.27859	1.18814	0.631784	11.9486	27.226	15.6796	6.75733	13.4089	0	81.678	0	18	6	14	0	86	0	middle
988	eca-mir-1543-p5_1ss2AG	TGGTCTGGGTGCAAACAATT	down	0.785638	-0.348064	0.633055	15.3129	12.0304	8.71087	24.7769	12.4511	12.4444	4.74872	18.8981	10	22	13	12	5	18	middle
989	efu-miR-9226_1ss4AG	TCAGGTCCCTGTTCGGGCGCCG	up	1.66774	0.737891	0.635921	1.87704	3.1304	0	5.63111	0	4.66666	0	4.72454	0	5	0	4.5	0	4.5	low
990	mmu-miR-664-5p_R+1	CTGGCTGGGGAAAATGACTGGA	up	1.05005	0.0704578	0.640841	55.1968	57.9594	52.2652	59.6897	53.6356	51.8518	67.4318	54.5947	60	53	56	50	71	52	middle
991	mmu-miR-218-1-3p	AAACATGGTTCCGTCAAGCACC	down	0.948757	-0.07589	0.640983	178.341	169.202	192.51	176.817	165.696	174.222	193.748	139.636	221	157	173	168	204	133	middle
992	PC-3p-15614_47	TCCACTGAGAGGACCACCCACT	down	0.728798	-0.456409	0.644356	9.29378	6.77329	0	13.5147	14.3667	6.22222	5.69846	8.39918	0	12	15	6	6	8	middle
993	hsa-miR-320b_R-2_1ss20CT	AAAAGCTGGGTTGAGAGGGT	up	1.1259	0.171074	0.644796	31.2528	35.1875	36.5856	23.6506	33.5222	21.7778	41.7887	41.9959	42	21	35	21	44	40	middle
994	mmu-miR-7669-5p_R+1	AGTACCACCATACACAGCTTTTGT	down	0.836224	-0.258038	0.651012	16.2047	13.5507	22.6483	13.5147	12.4511	7.25925	21.8441	11.5489	26	12	13	7	23	11	middle
995	mmu-miR-466i-5p_R+3_1ss18GA	TGTGTGTGTGTGTGTGTATGTGT	down	0.610684	-0.711502	0.65118	1.81442	1.10803	3.0488	0	2.39444	0	3.3241	0	3.5	0	2.5	0	3.5	0	low
996	mmu-miR-879-5p_R-1	AGAGGCTTATAGCTCTAAGC	up	1.09769	0.134475	0.651544	38.9839	42.7924	38.3278	51.8062	26.8178	44.5925	41.7887	41.9959	44	46	28	43	44	40	middle
997	mmu-miR-690_L-1R-3	AAGGCTAGGCTCACAACC	down	0.777925	-0.362296	0.653412	78.461	61.0368	58.3628	36.2268	140.793	33.7037	69.9645	79.4422	67	32.1667	147	32.5	73.6667	75.6667	middle
998	mmu-miR-3075-3p_R+1	ATCCTTGGCCTTCCTAGGTGTT	up	1.63875	0.712596	0.653959	2.61326	4.28248	7.83978	0	0	0	7.59795	5.24949	9	0	0	0	8	5	low
999	PC-3p-12378_66	CTCATTCTCTCCCACCCATAGT	down	0.892602	-0.163912	0.654361	54.4845	48.633	55.7495	34.9129	72.7911	42.5185	55.0851	48.2953	64	31	76	41	58	46	middle
1000	mmu-miR-669d-5p_L+1	CACTTGTGTGTGCATGTATATGT	up	1.26446	0.33852	0.656434	2.40326	3.03882	0	3.37866	3.83111	2.59259	2.84923	3.67464	0	3	4	2.5	3	3.5	low
1001	mmu-mir-5116-p3	TTCAGGCAGGGTCTTCATATCGAGA	up	2.19236	1.13248	0.656953	1.5963	3.49966	0	0	4.78889	0	0	10.499	0	0	5	0	0	10	middle
1002	mmu-mir-466g-p5	GTGTGCATGTGGATGTATGT	up	1.35199	0.435087	0.658581	8.4882	11.476	9.58195	10.136	5.74667	17.6296	0	16.7984	11	9	6	17	0	16	middle
1003	mmu-miR-669l-5p_L-1	GTTGTGTGTGCATGTATATGT	down	0.621264	-0.686721	0.661004	1.66923	1.03704	2.61326	0	2.39444	3.11111	0	0	3	0	2.5	3	0	0	low
1004	mmu-miR-669c-5p_1ss1AG	GTAGTTGTGTGTGGATGTGTGT	down	0.621264	-0.686721	0.661004	1.66923	1.03704	2.61326	0	2.39444	3.11111	0	0	3	0	2.5	3	0	0	low
1005	mmu-miR-3079-3p_L+2R-1	TCCAGGCTCATCAGATGAAAGT	down	0.697062	-0.520642	0.662627	4.75037	3.3113	0	5.63111	8.62	5.18518	4.74872	0	0	5	9	5	5	0	low
1006	mmu-miR-7654-3p_R-1	CGAGCGGGAGCGCGCCTCGTC	up	1.45979	0.545759	0.66267	3.36737	4.91564	4.35543	0	5.74667	0	9.49744	5.24949	5	0	6	0	10	5	low
1007	mmu-miR-497a-5p	CAGCAGCACACTGTGGTTTGTA	down	0.973753	-0.0383726	0.664567	1843.79	1795.39	1744.79	1937.1	1849.47	1921.63	1833.01	1631.54	2003	1720	1931	1853	1930	1554	middle
1008	mmu-miR-30d-5p_R+2	TGTAAACATCCCCGACTGGAAGCT	up	1.03182	0.0451917	0.669097	227398	234634	245196	210880	226117	212845	236320	254737	281484	187246	236086	205244	248825	242630	high
1009	oga-mir-872-p5	AAGGTTACTTGTTAGTTCAGGAT	down	0.918226	-0.123079	0.67114	18.6899	17.1616	13.9374	19.1458	22.9867	20.7407	17.0954	13.6487	16	17	24	20	18	13	middle
1010	PC-5p-10778_80	AACTGAGTTGAAGGCAAAGGT	down	0.852182	-0.230766	0.675782	16.1262	13.7425	16.5506	7.88355	23.9444	9.33332	16.1456	15.7485	19	7	25	9	17	15	middle
1011	mmu-miR-6997-5p	TAACAGGCTGGAGAGGTGCAGA	up	1.20404	0.267888	0.679507	7.93638	9.55575	6.96869	10.136	6.70445	6.22222	16.1456	6.29938	8	9	7	6	17	6	middle
1012	mmu-miR-3061-5p	CAGTGGGCCGTGAAAGGTAGCC	down	0.669367	-0.579131	0.680012	7.5673	5.0653	11.3241	5.63111	5.74667	0	15.1959	0	13	5	6	0	16	0	middle
1013	mmu-miR-140-5p	CAGTGGTTTTACCCTATGGTAG	down	0.963672	-0.0533863	0.680244	836.656	806.262	801.4	761.326	947.242	849.332	837.674	731.778	920	676	989	819	882	697	middle
1014	mmu-miR-196a-5p	TAGGTAGTTTCATGTTGTTGGG	up	1.07729	0.107402	0.683698	4626.06	4983.59	3969.11	5443.59	4465.48	5905.57	5384.73	3660.47	4556.5	4833.5	4662.33	5694.67	5669.67	3486.5	middle
1015	mmu-miR-1934-5p	TCTGGTCCCCTGCTTCGTCCTCT	down	0.907141	-0.140601	0.69084	31.9783	29.0089	19.1639	39.4177	37.3533	29.037	27.5426	30.447	22	35	39	28	29	29	middle
1016	mmu-miR-669f-3p_L-1R+1	ATATACATACACACACACGTATT	up	1.55329	0.635323	0.691048	1.50163	2.33246	0	4.50489	0	4.14814	2.84923	0	0	4	0	4	3	0	low
1017	cpo-miR-106a-5p	AAAAGTGCTTACAGTGCAGGTAG	down	0.913504	-0.130518	0.699264	13.2144	12.0714	16.5506	13.5147	9.57778	14.5185	13.2964	8.39918	19	12	10	14	14	8	middle
1018	mmu-miR-466d-5p_L-1R+1	GTGTGTGCGTACATGTACATGT	up	1.06048	0.0847142	0.706743	202.21	214.44	237.807	173.438	195.387	253.037	171.904	218.379	273	154	204	244	181	208	middle
1019	mmu-miR-490-5p	CCATGGATCTCCAGGTGGGT	down	0.822004	-0.282782	0.711981	8.05665	6.6226	9.58195	7.88355	6.70445	10.3704	9.49744	0	11	7	7	10	10	0	middle
1020	mmu-miR-471-3p	TGAAAGGTGCCATACTATGTAT	down	0.665717	-0.58702	0.712217	3.32885	2.21607	4.35543	5.63111	0	0	6.64821	0	5	5	0	0	7	0	low
1021	mmu-miR-669d-5p_1ss2CG	AGTTGTGTGTGCATGTATATGT	up	1.02273	0.0324264	0.713683	1199.51	1226.78	1118.48	1292.9	1187.17	1313.41	1215.2	1151.74	1284	1148	1239.5	1266.5	1279.5	1097	middle
1022	mmu-miR-361-3p_L-1	CCCCCAGGTGTGATTCTGATTTGT	up	1.0364	0.0515765	0.715192	379.953	393.782	410.282	376.158	353.42	336	406.49	438.857	471	334	369	324	428	418	middle
1023	mmu-miR-1981-5p	GTAAAGGCTGGGCTTAGACGTGGC	up	1.03632	0.0514637	0.719378	1254.56	1300.12	1437.29	1197.17	1129.22	1158.37	1357.18	1384.81	1650	1063	1179	1117	1429	1319	middle
1024	ssc-mir-1285-p3_1ss24TA	CAACATAGCGAGACCCCGTCTCTA	down	0.942571	-0.0853263	0.721314	949.757	895.214	969.519	1156.63	723.122	780.888	933.598	971.155	1113	1027	755	753	983	925	middle
1025	mmu-miR-669c-3p_L-1R+1	ACACACACACACACAAGTAAAC	up	1.16404	0.219141	0.725965	13.4841	15.696	9.58195	7.88355	22.9867	16.5926	9.49744	20.9979	11	7	24	16	10	20	middle
1026	ocu-miR-185-5p_R+3	TGGAGAGAAAGGCAGTTCCTGATAT	up	1.31205	0.391827	0.726627	3.04811	3.99928	4.35543	0	4.78889	0	5.69846	6.29938	5	0	5	0	6	6	low
1027	mmu-miR-1291	ATGGCTCTTACTGAAGACTAGCAGTT	down	0.830247	-0.268388	0.728772	5.61981	4.66583	4.35543	6.75733	5.74667	0	6.64821	7.34928	5	6	6	0	7	7	low
1028	mmu-miR-871-5p_R-1	TATTCAGATTAGTGCCAGTCAT	up	1.09711	0.133706	0.728934	33.7106	36.9842	38.3278	29.2818	33.5222	50.8148	37.04	23.0977	44	26	35	49	39	22	middle
1029	ocu-miR-16a-5p	TAGCAGCACGTAAATACTGGCG	up	1.10143	0.139382	0.729039	7.04753	7.76239	10.0175	3.94177	7.18333	8.81481	7.12308	7.34928	11.5	3.5	7.5	8.5	7.5	7	middle
1030	mmu-miR-322-3p_R-1	AAACATGAAGCGCTGCAACA	up	1.01071	0.0153725	0.730244	56126.1	56727.3	56686.8	53447.1	58244.4	57887.3	55397.6	56897.1	65076	47457	60812	55820	58329	54193	high
1031	mmu-miR-296-3p	GAGGGTTGGGTGGAGGCTCTCC	up	1.02673	0.0380523	0.734694	6756.96	6937.55	7246.57	6400.32	6623.99	6121.62	7180.06	7510.96	8319	5683	6916	5903	7560	7154	high
1032	mmu-miR-196a-1-3p_L+1R-1	ACAACGACATCAAACCACCTGA	down	0.975141	-0.036317	0.734953	814.908	794.65	849.309	805.248	790.167	694.814	857.619	831.519	975	715	825	670	903	792	middle
1033	rno-miR-3593-3p_L-1_1ss22AT	TTCAACCTTAAGGGGGCCTCT	down	0.762636	-0.390934	0.736607	4.37002	3.33274	5.22652	7.88355	0	0	4.74872	5.24949	6	7	0	0	5	5	low
1034	bta-mir-1246-p3_1ss2CT	ATATATTAAATGGATTTT	down	0.852795	-0.229729	0.738762	6.59191	5.62155	9.58195	7.32044	2.87333	2.59259	9.02257	5.24949	11	6.5	3	2.5	9.5	5	low
1035	mmu-miR-15b-3p_R-1	CGAATCATTATTTGCTGCTCT	down	0.956913	-0.0635397	0.740576	1197.4	1145.81	1132.41	1333.45	1126.35	1332.59	1196.68	908.161	1300	1184	1176	1285	1260	865	middle
1036	mmu-miR-466c-5p_R-4_1ss20CT	TGATGTGTGTGTGCATGTAT	up	1.71333	0.776799	0.741461	1.01627	1.7412	3.0488	0	0	0	5.22359	0	3.5	0	0	0	5.5	0	low
1037	mmu-miR-344c-3p	TGATCTAGTCAAAGCCTGACAGT	up	1.11471	0.156672	0.742834	38.8314	43.2859	43.5543	39.4177	33.5222	62.2222	45.5877	22.0478	50	35	35	60	48	21	middle
1038	PC-3p-39418_7	TCCCCCAACACCCACCTTGCC	up	1.68738	0.754787	0.747498	1.45181	2.44976	4.35543	0	0	0	0	7.34928	5	0	0	0	0	7	low
1039	mmu-miR-410-3p	AATATAACACAGATGGCCTGT	up	1.4255	0.511472	0.748388	2.3229	3.3113	6.96869	0	0	5.18518	4.74872	0	8	0	0	5	5	0	low
1040	mmu-miR-3089-3p	AGCATCTGCTGATCCTGAGCTGT	up	1.05314	0.0747034	0.750946	12.3722	13.0297	13.0663	13.5147	10.5356	12.4444	16.1456	10.499	15	12	11	12	17	10	middle
1041	mmu-miR-181c-3p	ACCATCGACCGTTGAGTGGACC	up	1.05909	0.0828209	0.751113	180.857	191.543	188.155	147.535	206.88	232.296	198.496	143.836	216	131	216	224	209	137	middle
1042	mdo-miR-181b-5p_R+3_3	AACATTCATTGCTGTCGGTGGGTTTT	down	0.953576	-0.0685795	0.752994	899.594	857.831	1055.76	912.239	730.785	771.555	783.539	1018.4	1212	810	763	744	825	970	middle
1043	mdo-miR-181b-5p_R+3_2	AACATTCATTGCTGTCGGTGGGTTGT	down	0.953576	-0.0685795	0.752994	899.594	857.831	1055.76	912.239	730.785	771.555	783.539	1018.4	1212	810	763	744	825	970	middle
1044	mdo-miR-181b-5p_R+3_1	AACATTCATTGCTGTCGGTGGGTTAT	down	0.953576	-0.0685795	0.752994	899.594	857.831	1055.76	912.239	730.785	771.555	783.539	1018.4	1212	810	763	744	825	970	middle
1045	PC-3p-7657_129	ATCACATTGCCAGGGATTTTT	up	1.10388	0.14258	0.754021	20.7577	22.914	23.5193	15.7671	22.9867	23.8518	32.2913	12.5988	27	14	24	23	34	12	middle
1046	cgr-miR-532-5p_R+2_2	CATGCCTTGAGTGTAGGACCGTTA	down	0.879018	-0.186036	0.764015	18.1442	15.9491	27.0037	16.8933	10.5356	19.7037	21.8441	6.29938	31	15	11	19	23	6	middle
1047	cgr-miR-532-5p_R+2_1	CATGCCTTGAGTGTAGGACCGTAA	down	0.879018	-0.186036	0.764015	18.1442	15.9491	27.0037	16.8933	10.5356	19.7037	21.8441	6.29938	31	15	11	19	23	6	middle
1048	mmu-miR-669l-3p	ATATACATACACACCCATATAT	down	0.881168	-0.182511	0.766265	17.4033	15.3352	16.5506	7.88355	27.7756	15.037	19.9446	11.0239	19	7	29	14.5	21	10.5	middle
1049	oga-miR-28b_R+3	TCGAGGAGCTCACAGTCTAGTAGT	down	0.955905	-0.0650608	0.766364	20.4032	19.5035	20.035	19.1458	22.0289	14.5185	20.8944	23.0977	23	17	23	14	22	22	middle
1050	mmu-miR-33-3p_R-1	CAATGTTTCCACAGTGCATCA	down	0.973117	-0.0393149	0.768065	245.619	239.016	224.74	247.769	264.347	253.037	259.28	204.73	258	220	276	244	273	195	middle
1051	PC-3p-15176_49	CTCCCTGCTCCCTGCCCCTAGT	up	1.07628	0.106055	0.768951	7.76793	8.36048	6.96869	6.75733	9.57778	5.18518	10.4472	9.44907	8	6	10	5	11	9	middle
1052	mmu-miR-669d-2-3p_L+3R-2	TACATATACATACACACCCATAT	down	0.857985	-0.220976	0.769043	12.0844	10.3682	3.91989	11.2622	21.0711	7.25925	12.8215	11.0239	4.5	10	22	7	13.5	10.5	middle
1053	mdo-miR-139-5p_R+5	TCTACAGTGCATGTGTCTCCAGT	down	0.799601	-0.322648	0.772275	4.168	3.33274	0	6.75733	5.74667	0	4.74872	5.24949	0	6	6	0	5	5	low
1054	mmu-miR-455-3p_R+1	GCAGTCCACGGGCATATACACT	up	1.10466	0.143607	0.77853	131.36	145.109	129.792	114.875	149.413	118.222	89.2759	227.828	149	102	156	114	94	217	middle
1055	mmu-miR-3064-5p_R-1	TCTGGCTGTTGTGGTGTGCAA	down	0.641352	-0.640812	0.780241	4.93616	3.16581	14.8085	0	0	0	9.49744	0	17	0	0	0	10	0	middle
1056	mmu-miR-677-5p_R+2	TTCAGTGATGATTAGCTTCTGACT	down	0.819545	-0.287105	0.783479	14.8203	12.1459	13.9374	24.7769	5.74667	24.8889	0	11.5489	16	22	6	24	0	11	middle
1057	mmu-miR-704_R+1	AGACATGTGCTCTGCTCCTAGT	down	0.919525	-0.12104	0.784125	17.2827	15.8919	25.2615	11.2622	15.3244	13.4815	14.2462	19.948	29	10	16	13	15	19	middle
1058	mmu-miR-297c-3p_L+1_1ss23AT	ATATACATACACACATACCCATT	down	0.965831	-0.0501568	0.786233	32.603	31.489	31.7947	31.5342	34.48	37.8518	25.6431	30.972	36.5	28	36	36.5	27	29.5	middle
1059	ssc-miR-150_R+3	TCTCCCAACCCTTGTACCAGTGCCT	up	1.53465	0.617912	0.787114	1.5963	2.44976	0	0	4.78889	0	0	7.34928	0	0	5	0	0	7	low
1060	efu-mir-9277-p3_1ss5CT	GGGTTTCCCCGCGCAGGT	up	1.09549	0.131581	0.792027	42.2841	46.3219	39.1989	22.5244	65.1289	33.1852	52.2359	53.5448	45	20	68	32	55	51	middle
1061	mmu-miR-103-2-5p_R+1	AGCTTCTTTACAGTGCTGCCTTGT	up	1.01733	0.0247921	0.793959	243.149	247.364	246.517	251.147	231.782	273.777	238.386	229.927	283	223	242	264	251	219	middle
1062	hsa-mir-4485-p3_1ss17CT	TTTAACGGCCGCGGTATCC	down	0.669596	-0.578637	0.799124	5.22652	3.49966	15.6796	0	0	0	0	10.499	18	0	0	0	0	10	middle
1063	hsa-mir-4454-p3_1ss3GA	CGAATCCGAGTCACGGCAC	up	1.49157	0.57683	0.799683	0.938518	1.39986	0	2.81555	0	0	0	4.19959	0	2.5	0	0	0	4	low
1064	hsa-mir-4454-p5_1ss3GA	CGAATCCGAGTCACGGCAC	up	1.49157	0.57683	0.799683	0.938518	1.39986	0	2.81555	0	0	0	4.19959	0	2.5	0	0	0	4	low
1065	bta-miR-139_L+2	TCTCTACAGTGCACGTGTCTCCAGT	up	1.11874	0.161881	0.803996	16.6059	18.5778	13.9374	15.7671	20.1133	29.037	5.69846	20.9979	16	14	21	28	6	20	middle
1066	mmu-miR-669l-5p_L-2R+2	TTGTGTGTGCATGTATATGTGT	up	1.22439	0.292059	0.804687	5.36138	6.5644	10.453	5.63111	0	8.29629	11.3969	0	12	5	0	8	12	0	middle
1067	mmu-miR-190a-5p_R+1	TGATATGTTTGATATATTAGGTT	down	0.924035	-0.11398	0.807905	58.2276	53.8044	38.3278	85.5928	50.7622	69.4814	54.1354	37.7963	44	76	53	67	57	36	middle
1068	mmu-miR-880-3p	TACTCCATCCTCTCTGAGTAGA	up	1.03056	0.0434285	0.810664	137.127	141.318	137.632	120.506	153.244	115.111	157.657	151.185	158	107	160	111	166	144	middle
1069	mmu-miR-669h-3p_L-2R+2	TGCATATACACACATGCACACA	up	1.06656	0.092967	0.811093	19.0043	20.2692	19.1639	22.5244	15.3244	18.6666	28.4923	13.6487	22	20	16	18	30	13	middle
1070	mmu-miR-29a-3p	TAGCACCATCTGAAATCGGTTA	up	1.01486	0.0212855	0.813428	28895.6	29325.1	27055.5	27700.5	31930.9	30539.7	28553.6	28882.1	31059.5	24596	33338.5	29449	30064.5	27509.5	high
1071	mmu-miR-362-3p_R-1	AACACACCTGTTCAAGGATTC	down	0.971733	-0.0413676	0.816822	606.369	589.229	594.952	545.091	679.065	701.036	548.002	518.649	683	484	709	676	577	494	middle
1072	mmu-miR-28c_L+1R+1	AAGGAGCTCACAGTCTATTGAA	up	1.05502	0.0772714	0.819316	23.0941	24.3648	23.6645	15.7671	29.8507	21.0864	21.2109	30.797	27.1667	14	31.1667	20.3333	22.3333	29.3333	middle
1073	mmu-miR-350-3p_R+2	TTCACAAAGCCCATACACTTTCAC	up	1.01366	0.01958	0.819544	8318.82	8432.49	7784.03	8174.11	8998.32	8126.21	9028.27	8143	8936	7258	9395	7836	9506	7756	high
1074	mmu-miR-467e-5p_1ss22TA	ATAAGTGTGAGCATGTATATGA	down	0.883121	-0.179317	0.824092	2.98316	2.63449	2.61326	3.94177	2.39444	3.62963	4.27385	0	3	3.5	2.5	3.5	4.5	0	low
1075	mmu-miR-467e-3p_1ss9AG	ATATACATGCACACACCTATAT	down	0.708294	-0.497579	0.824761	1.11741	0.791453	0	0	3.35222	0	2.37436	0	0	0	3.5	0	2.5	0	low
1076	mmu-mir-5134-p5_1ss9GT	GGCAGAAATGGCAGCTGTGA	down	0.708294	-0.497579	0.824761	2.23482	1.58291	0	0	6.70445	0	4.74872	0	0	0	7	0	5	0	low
1077	mmu-miR-297a-5p_1ss22TA	ATGTATGTGTGCATGTGCATGA	down	0.923961	-0.114096	0.826605	8.8003	8.13113	7.83978	5.63111	12.93	6.22222	11.8718	6.29938	9	5	13.5	6	12.5	6	middle
1078	mmu-miR-98-5p	TGAGGTAGTAAGTTGTATTGTT	down	0.960897	-0.0575466	0.827284	6254.81	6010.23	5459.1	7328.32	5977.01	7482.53	6096.6	4451.56	6267	6507	6240.5	7215.3	6419.2	4240	high
1079	mmu-miR-5125_L+1	TTCTGCCTGGGATTTCCTTGT	down	0.845296	-0.242472	0.829571	4.52882	3.82819	7.83978	0	5.74667	5.18518	0	6.29938	9	0	6	5	0	6	low
1080	mmu-miR-194-2-3p_R+1	CCAGTGGGGCTGCTGTTATCTGT	up	1.38826	0.473274	0.832661	1.5963	2.21607	0	0	4.78889	0	6.64821	0	0	0	5	0	7	0	low
1081	mmu-miR-12182-3p_L-1	AATTAGGCTCTGGATCTGTGA	up	1.38826	0.473274	0.832661	1.5963	2.21607	0	0	4.78889	0	6.64821	0	0	0	5	0	7	0	low
1082	bta-miR-96_L+2	TCTTTGGCACTAGCACATTTTTGCT	up	1.38826	0.473274	0.832661	1.5963	2.21607	0	0	4.78889	0	6.64821	0	0	0	5	0	7	0	low
1083	hsa-mir-4454-p3_1ss20AT	ATCCGAGTCACGGCACCAAT	up	1.0408	0.0576915	0.834882	51.6639	53.7718	63.1538	47.3013	44.5367	51.3333	42.2636	67.7184	72.5	42	46.5	49.5	44.5	64.5	middle
1084	mmu-miR-12202-3p	TCTTCTCTTTCCAGTCATCAGC	up	1.26116	0.334754	0.839889	3.37866	4.26104	0	10.136	0	5.18518	7.59795	0	0	9	0	5	8	0	middle
1085	PC-5p-24841_21	TACAGAGTGGGACTGGTCTTA	up	1.25682	0.329773	0.84048	2.90362	3.64932	8.71087	0	0	0	5.69846	5.24949	10	0	0	0	6	5	low
1086	mmu-mir-466d-p3_1ss21AT	ATACATACACGCACACATAGT	down	0.856711	-0.22312	0.841706	2.43849	2.08908	3.48435	0	3.83111	2.59259	0	3.67464	4	0	4	2.5	0	3.5	low
1087	pal-miR-9226-5p_L-3_1ss4AG	GGTCCCTGTTCGGGCGCCA	up	1.02291	0.0326768	0.842146	274.84	281.136	297.912	274.235	252.374	255.111	255.481	332.817	342	243.5	263.5	246	269	317	middle
1088	mmu-miR-3075-5p_R+3	TGTCTGGGAGCAGCCAAGGACAAG	up	1.16589	0.221427	0.846599	4.8657	5.67286	7.83978	6.75733	0	10.3704	6.64821	0	9	6	0	10	7	0	middle
1089	mmu-miR-6944-3p	TAACTCTTCCCTTGTGCCCTCAG	up	1.02985	0.0424284	0.849564	39.5101	40.6893	41.8122	32.6604	44.0578	41.4814	32.2913	48.2953	48	29	46	40	34	46	middle
1090	mmu-miR-669p-3p_L-1	ATAACATACACACACACACGTAT	up	1.02044	0.0291888	0.850738	121.848	124.339	130.227	128.765	106.553	106.555	126.474	139.986	149.5	114.333	111.25	102.75	133.167	133.333	middle
1091	bta-miR-450b_R+2_1ss8AG	TTTTGCAGTATGTTCCTGAATATT	down	0.89769	-0.15571	0.857733	9.40579	8.44348	14.8085	0	13.4089	9.33332	7.59795	8.39918	17	0	14	9	8	8	middle
1092	mmu-miR-3074-5p	GTTCCTGCTGAACTGAGCCAGT	up	1.02813	0.0400247	0.859096	24.4372	25.1246	24.3904	19.7089	29.2122	21.2592	29.4421	24.6726	28	17.5	30.5	20.5	31	23.5	middle
1093	rno-miR-101b-3p_L+1R-1	GTACAGTACTGTGATAGCTGA	down	0.978235	-0.0317477	0.863019	9079.8	8882.17	8263.71	9637.83	9337.86	10781.4	8137.72	7727.42	9486.67	8557.67	9749.5	10396.3	8568.33	7360.17	high
1094	mmu-miR-374b-5p_R-1	ATATAATACAACCTGCTAAGT	up	1.02217	0.0316367	0.864571	3260.97	3333.26	2858.47	3520	3404.42	3867.11	3417.65	2715.03	3281.5	3125.5	3554.5	3729	3598.5	2586	middle
1095	mmu-miR-6239_R-2_1ss6TG	TAGCGGTGGATCACTCGG	down	0.870296	-0.200421	0.864909	5.03579	4.38263	6.09761	9.00977	0	0	4.74872	8.39918	7	8	0	0	5	8	low
1096	mmu-miR-185-3p	AGGGGCTGGCTTTCCTCTGGT	up	1.05503	0.077287	0.865359	37.8767	39.9611	54.8785	21.3982	37.3533	28	44.638	47.2454	63	19	39	27	47	45	middle
1097	mmu-miR-1194_1ss3AC	GACTGAGTAACTGCTAGATCCT	down	0.988708	-0.016383	0.867313	60.0658	59.3876	56.6206	64.1946	59.3822	65.3333	55.0851	57.7443	65	57	62	63	58	55	middle
1098	hsa-miR-1260b	ATCCCACCACTGCCACCAT	up	1.07942	0.11026	0.868281	10.7239	11.5756	6.96869	18.0195	7.18333	17.6296	7.12308	9.97402	8	16	7.5	17	7.5	9.5	middle
1099	mmu-miR-211-5p	TTCCCTTTGTCATCCTTTGCCT	down	0.776858	-0.364277	0.869182	2.25244	1.74983	0	6.75733	0	0	0	5.24949	0	6	0	0	0	5	low
1100	rno-miR-3547_R-1_1ss22AT	TGAGCACCACCCCTCTCTCAGT	up	1.01609	0.0230256	0.869761	12.9834	13.1923	12.1952	12.3884	14.3667	13.4815	11.3969	14.6986	14	11	15	13	12	14	middle
1101	mmu-miR-297c-3p_L+1_1ss23AG	ATATACATACACACATACCCATG	up	1.19774	0.260316	0.875536	1.5963	1.91195	0	0	4.78889	3.11111	0	2.62474	0	0	5	3	0	2.5	low
1102	mmu-miR-34a-5p	TGGCAGTGTCTTAGCTGGTTGT	up	1.00859	0.012342	0.881527	3142.35	3169.34	3020.93	3326.86	3079.26	3448.14	3007.84	3052.05	3468	2954	3215	3325	3167	2907	middle
1103	mmu-miR-188-3p	CTCCCACATGCAGGGTTTGCA	down	0.968335	-0.0464216	0.882388	55.0488	53.3057	74.9134	46.1751	44.0578	61.1851	49.3867	49.3452	86	41	46	59	52	47	middle
1104	mmu-miR-122-5p_R+1	TGGAGTGTGACAATGGTGTTTGT	down	0.956882	-0.0635876	0.884802	556.329	532.341	477.355	795.112	396.52	377.481	511.912	707.631	548	706	414	364	539	674	middle
1105	mmu-mir-5104b-p3	AGGGCTAGTGAGATGGCTCAGC	down	0.896083	-0.158296	0.885318	4.26735	3.8239	6.09761	0	6.70445	6.22222	0	5.24949	7	0	7	6	0	5	low
1106	mmu-miR-199b-3p_R-1	ACAGTAGTCTGCACATTGGTT	down	0.987925	-0.0175259	0.886242	973.559	961.804	916.673	1001.21	1002.79	1086.47	951.327	847.617	1052.33	889	1047	1047.67	1001.67	807.333	middle
1107	mmu-miR-297c-5p_R+2	ATGTATGTGTGCATGTACATGTGT	down	0.985977	-0.0203737	0.886941	133.951	132.073	113.241	143.03	145.582	134.815	119.668	141.736	130	127	152	130	126	135	middle
1108	mmu-mir-466k-p5_1ss24GA	TGTGTGTGTACATGTACATGTGAA	down	0.853454	-0.228614	0.891061	1.66923	1.42462	2.61326	0	2.39444	0	4.27385	0	3	0	2.5	0	4.5	0	low
1109	mmu-mir-466k-p3_1ss24GA	TGTGTGTGTACATGTACATGTGAA	down	0.853454	-0.228614	0.891061	1.66923	1.42462	2.61326	0	2.39444	0	4.27385	0	3	0	2.5	0	4.5	0	low
1110	mmu-miR-34b-5p	AGGCAGTGTAATTAGCTGATTGT	up	1.02765	0.0393472	0.899063	45.3339	46.5873	34.8435	55.1848	45.9733	53.9259	32.2913	53.5448	40	49	48	52	34	51	middle
1111	mmu-miR-200a-3p_R+1	TAACACTGTCTGGTAACGATGTT	down	0.978282	-0.031677	0.899292	132.395	129.519	134.147	138.525	124.511	168	118.718	101.84	154	123	130	162	125	97	middle
1112	mmu-miR-3474	CCCTGGGAGGAGACGTGGATTC	down	0.826343	-0.275187	0.900191	1.91556	1.58291	0	0	5.74667	0	4.74872	0	0	0	6	0	5	0	low
1113	mmu-miR-330-5p_R+1	TCTCTGGGCCTGTGTCTTAGGCT	up	1.00835	0.0119943	0.900623	432.732	436.345	408.54	453.867	435.789	452.148	466.324	390.562	469	403	455	436	491	372	middle
1114	mmu-let-7j_R-1_1ss8TG	TGAGGTAGTAGTTTGTGCTGTTA	up	1.01829	0.0261504	0.904143	1287.17	1310.72	1262.64	1430.86	1168.01	1606.37	1276.93	1048.85	1449.5	1270.5	1219.5	1549	1344.5	999	middle
1115	hsa-miR-1260a_R+3_1ss9TA	ATCCCACCACTGCCACCAAAA	up	1.16657	0.222277	0.906042	2.24996	2.62474	4.35543	0	2.39444	0	0	7.87423	5	0	2.5	0	0	7.5	low
1116	mmu-let-7f-5p	TGAGGTAGTAGATTGTATAGTT	up	1.01906	0.0272325	0.907094	61526.5	62698.9	54166.4	69358.2	61054.9	75277.1	65396.7	47423	62182.6	61584.8	63746.4	72588.7	68857.2	45169.2	high
1117	mmu-miR-181d-5p_R+1	AACATTCATTGTTGTCGGTGGGTT	up	1.00371	0.00533639	0.907972	3308.19	3320.45	3419.6	3379.41	3125.55	3325.08	3276.93	3359.32	3925.67	3000.67	3263.33	3206.33	3450.33	3199.67	middle
1118	mmu-miR-26b-5p_R+1	TTCAAGTAATTCAGGATAGGTT	down	0.986587	-0.019482	0.915987	47534.1	46896.5	41342.9	50106	51153.3	53988.8	48657	38043.7	47461.3	44490.3	53408.3	52060.7	51231.7	36235.7	high
1119	PC-5p-22213_26	ACCGATCCCGGGTTAGTCTCCT	up	1.08875	0.122679	0.91716	4.22415	4.59906	0	7.88355	4.78889	0	8.5477	5.24949	0	7	5	0	9	5	low
1120	mmu-miR-883b-3p_R+1	TAACTGCAACATCTCTCAGTATT	up	1.03903	0.0552422	0.91904	7.59468	7.89113	6.53315	6.19422	10.0567	11.9259	8.07282	3.67464	7.5	5.5	10.5	11.5	8.5	3.5	middle
1121	mmu-miR-542-3p_R+1	TGTGACAGATTGATAACTGAAAG	up	1.01451	0.0207791	0.921027	12822.5	13008.5	11062.8	13810.9	13593.7	15787.8	12582.2	10655.4	12700	12263	14193	15224	13248	10149	high
1122	efu-miR-9226_2ss4AG22GA	TCAGGTCCCTGTTCGGGCGCCA	down	0.991465	-0.012366	0.922798	2445.31	2424.44	2651.59	2438.83	2245.51	2190.22	2344.44	2738.66	3044	2165.5	2344.5	2112	2468.5	2608.5	middle
1123	pal-miR-9226-5p_1ss4AG	TCAGGTCCCTGTTCGGGCGCCA	down	0.991465	-0.012366	0.922798	2445.31	2424.44	2651.59	2438.83	2245.51	2190.22	2344.44	2738.66	3044	2165.5	2344.5	2112	2468.5	2608.5	middle
1124	mmu-miR-3076-5p_L-1R-1	ACAGGGGAAGCTCAGTGCCAGC	down	0.86766	-0.204798	0.925278	2.55407	2.21607	0	0	7.66222	0	6.64821	0	0	0	8	0	7	0	low
1125	mmu-miR-335-5p	TCAAGAGCAATAACGAAAAATGT	up	1.01319	0.0189078	0.925372	96578.7	97852.8	82015.4	103104	104616	118048	91933.3	83577.1	94153	91549	109228	113832	96798	79605	high
1126	mmu-miR-872-5p	AAGGTTACTTGTTAGTTCAGG	up	1.01555	0.0222585	0.934457	2095.79	2128.37	1867.61	2418	2001.76	2675.55	2157.82	1551.75	2144	2147	2090	2580	2272	1478	middle
1127	mmu-miR-3068-5p_R-1	TTGGAGTTCATGCAAGTTCTAAC	down	0.988325	-0.0169422	0.934729	317.047	313.346	311.849	323.226	316.067	393.037	268.778	278.223	358	287	330	379	283	265	middle
1128	mmu-miR-6412_R-2_1ss15AT	TCGAAACCATCCTCTGCTAC	down	0.967185	-0.0481357	0.935998	12.4765	12.0671	10.453	20.272	6.70445	15.5555	13.2964	7.34928	12	18	7	15	14	7	middle
1129	mmu-miR-1306-3p_R+1	ACGTTGGCTCTGGTGGTGATGT	up	1.01261	0.0180789	0.937363	117.692	119.176	150.698	97.9813	104.398	114.074	120.617	122.838	173	87	109	110	127	117	middle
1130	PC-5p-27198_18	GAGCCACTACTGCCCGGCTCC	down	0.941971	-0.0862461	0.937672	3.90957	3.6827	6.09761	5.63111	0	0	4.74872	6.29938	7	5	0	0	5	6	low
1131	mmu-mir-3535-p3	TAGATAGTCAAGTTCTGATC	down	0.927264	-0.108947	0.937766	6.98518	6.47711	0	5.63111	15.3244	5.18518	14.2462	0	0	5	16	5	15	0	middle
1132	mmu-miR-467e-3p	ATATACATACACACACCTATAT	down	0.992132	-0.0113955	0.940669	125.342	124.356	130.663	103.612	141.751	118.741	132.014	122.313	150	92	148	114.5	139	116.5	middle
1133	cja-miR-24_R+2	TGGCTCAGTTCAGCAGGAACAGTG	up	1.04939	0.0695507	0.941852	11.4705	12.0371	13.0663	14.6409	6.70445	22.8148	13.2964	0	15	13	7	22	14	0	middle
1134	mmu-miR-466h-3p_R+4	TACGCACGCACACACACACACAT	down	0.962345	-0.0553736	0.951233	4.20956	4.05105	7.83978	0	4.78889	3.62963	3.79898	4.72454	9	0	5	3.5	4	4.5	low
1135	mmu-mir-6236-p3_1ss7AG	ATACCCGGCCGTCGCCGGCAGT	up	1.0466	0.0657134	0.952187	3.65773	3.82819	5.22652	0	5.74667	5.18518	0	6.29938	6	0	6	5	0	6	low
1136	PC-5p-21593_27	TATGTATGTGCCTGTGTGCG	down	0.955425	-0.0657853	0.952739	2.24515	2.14507	3.91989	2.81555	0	3.11111	3.3241	0	4.5	2.5	0	3	3.5	0	low
1137	bta-miR-7_R+1_1ss24TA	TGGAAGACTAGTGATTTTGTTGTAC	up	1.0903	0.124722	0.95428	1.45181	1.58291	4.35543	0	0	0	4.74872	0	5	0	0	0	5	0	low
1138	mmu-miR-191-5p_R-1	CAACGGAATCCCAAAAGCAGCT	up	1.00289	0.00416614	0.955079	32989	33084.4	34664	30665.9	33637.2	31218.9	33204	34830.3	39794	27229	35120	30104	34961	33175	high
1139	pal-miR-9226-5p_L-2_1ss4AG	AGGTCCCTGTTCGGGCGCCA	up	1.007	0.0100658	0.957141	47.7329	48.0671	46.6031	53.4955	43.1	40.4444	46.5375	57.2194	53.5	47.5	45	39	49	54.5	middle
1140	mmu-miR-9769-3p_1ss22CT	TAGGGTCTGTTCTGTGTCCTCT	up	1.08275	0.114703	0.957935	1.5963	1.72839	0	0	4.78889	5.18518	0	0	0	0	5	5	0	0	low
1141	mmu-mir-328-p5	TGTCTCGGAGCCTGGGGCA	down	0.992828	-0.0103847	0.958458	47.6373	47.2956	54.8785	50.68	37.3533	43.5555	53.1857	45.1456	63	45	39	42	56	43	middle
1142	mmu-miR-103-1-5p_R+1	GGCTTCTTTACAGTGCTGCCTTGT	down	0.942893	-0.0848346	0.962227	3.51185	3.3113	0	0	10.5356	5.18518	4.74872	0	0	0	11	5	5	0	middle
1143	mmu-miR-216a-5p	TAATCTCAGCTGGCAACTGTGA	up	1.00971	0.0139376	0.962548	52.428	52.937	41.8122	48.4275	67.0445	41.4814	52.2359	65.0936	48	43	70	40	55	62	middle
1144	mmu-miR-5129-5p_1ss12TC	ATGTGGGGGCACTGGTATTTTC	down	0.93223	-0.101242	0.962852	1.87704	1.74983	0	5.63111	0	0	0	5.24949	0	5	0	0	0	5	low
1145	hsa-miR-297_R+2	ATGTATGTGTGCATGTGCATGTA	down	0.993165	-0.00989484	0.963042	98.7566	98.0816	78.3978	99.1075	118.764	105.778	84.5272	103.94	90	88	124	102	89	99	middle
1146	PC-5p-16103_45	ACCTGCTGTTCCAAGGGTCCCGAGT	up	1.0086	0.0123571	0.963802	7.36363	7.42697	7.83978	5.63111	8.62	9.33332	6.64821	6.29938	9	5	9	9	7	6	low
1147	PC-3p-24778_21	CCTCTGCTCTCCTGGACCCCAGT	up	1.02827	0.0402229	0.963856	7.68124	7.89841	9.58195	6.75733	6.70445	0	14.2462	9.44907	11	6	7	0	15	9	middle
1148	pal-miR-9226-5p_1ss4AT	TCATGTCCCTGTTCGGGCGCCA	down	0.995943	-0.00586549	0.965485	569.812	567.5	621.52	565.926	521.989	496.74	567.947	637.813	713.5	502.5	545	479	598	607.5	middle
1149	PC-5p-27228_18	AGGTGGGATCCCGAGGCC	down	0.967531	-0.0476207	0.966289	4.168	4.03267	0	6.75733	5.74667	0	4.74872	7.34928	0	6	6	0	5	7	low
1150	PC-5p-8431_113	CGAGGCATCTCACAGGCCGTCT	down	0.992203	-0.0112927	0.974247	18.4684	18.3244	21.7772	13.5147	20.1133	13.4815	24.6933	16.7984	25	12	21	13	26	16	middle
1151	PC-3p-11258_76	TAGGATAGCCTGGGCTACACTGA	up	1.00952	0.0136648	0.976644	17.0584	17.2208	10.453	22.5244	18.1978	16.5926	10.9221	24.1476	12	20	19	16	11.5	23	middle
1152	mmu-miR-5114_R+2	ACTGGAGACGGAAGCTGCAAGAGC	down	0.993996	-0.00868842	0.976862	46.6877	46.4074	42.6832	61.9422	35.4378	52.8888	47.4872	38.8462	49	55	37	51	50	37	middle
1153	mmu-miR-9-3p_L-1R+1	TAAAGCTAGATAACCGAAAGTA	up	1.00255	0.00367859	0.97951	175.919	176.368	155.779	178.506	193.471	200.839	164.306	163.959	178.833	158.5	202	193.667	173	156.167	middle
1154	mmu-miR-465a-5p	TATTTAGAATGGCACTGATGTGA	up	1.00521	0.00750235	0.980606	41.931	42.1496	41.8122	42.7964	41.1845	50.8148	49.3867	26.2474	48	38	43	49	52	25	middle
1155	mmu-miR-181d-3p_L-1R+1	CCACCGGGGGATGAATGTCAT	down	0.964218	-0.052568	0.980686	4.35543	4.19959	13.0663	0	0	0	0	12.5988	15	0	0	0	0	12	middle
1156	mmu-miR-669f-3p_1ss23TA	CATATACATACACACACACGTAA	up	1.03309	0.0469676	0.982741	1.01627	1.0499	3.0488	0	0	0	0	3.14969	3.5	0	0	0	0	3	low
1157	mmu-miR-7661-3p	TTGACTCCCAGTTTCTCTCTGC	down	0.975604	-0.0356329	0.983976	4.06507	3.9659	12.1952	0	0	0	6.64821	5.24949	14	0	0	0	7	5	middle
1158	pal-miR-9993a-3p	ATCTCGGTGGGACCTCCA	down	0.998486	-0.00218536	0.985001	899.391	898.03	1010.46	890.841	796.871	931.258	855.719	907.111	1160	791	832	898	901	864	middle
1159	mmu-miR-12185-3p_R-1	TCAGCCACTGTGTCCCCTCCT	up	1.01007	0.0144585	0.986362	6.28558	6.34889	5.22652	7.88355	5.74667	0	8.5477	10.499	6	7	6	0	9	10	middle
1160	pal-miR-9993a-3p_L+2	AAATCTCGGTGGGACCTCCA	down	0.992314	-0.0111307	0.991136	3.41071	3.3845	3.0488	0	7.18333	3.62963	2.84923	3.67464	3.5	0	7.5	3.5	3	3.5	low
1161	mmu-miR-6997-3p	TCAAACCTTACCCTCCTGTTTCC	up	1.00847	0.0121635	0.992406	9.87589	9.95951	11.3241	13.5147	4.78889	5.18518	24.6933	0	13	12	5	5	26	0	middle
1162	hsa-miR-4448_R-2_1ss6CG	GGCTCGTTGGTCTAGGGG	up	1.00228	0.00328415	0.992732	19.4135	19.4577	13.0663	20.272	24.9022	13.4815	22.319	22.5728	15	18	26	13	23.5	21.5	middle
1163	mmu-miR-16-2-3p	ACCAATATTATTGTGCTGCTTT	up	1.00107	0.00154023	0.994251	285.879	286.184	227.354	314.216	316.067	340.148	261.18	257.225	261	279	330	328	275	245	middle
1164	mmu-mir-669m-2-p5	AGTTTTGTGTGCATGTGCATGTGT	down	0.999524	-0.000686884	0.995301	1248.87	1248.28	1182.21	1375.49	1188.92	1388.89	1188.02	1167.94	1357.17	1221.33	1241.33	1339.29	1250.88	1112.43	middle
1165	mmu-miR-669b-5p_R+2	AGTTTTGTGTGCATGTGCATGTGT	down	0.999524	-0.000686884	0.995301	1248.87	1248.28	1182.21	1375.49	1188.92	1388.89	1188.02	1167.94	1357.17	1221.33	1241.33	1339.29	1250.88	1112.43	middle
1166	mmu-mir-669m-1-p5	AGTTTTGTGTGCATGTGCATGTGT	down	0.999524	-0.000686884	0.995301	1248.87	1248.28	1182.21	1375.49	1188.92	1388.89	1188.02	1167.94	1357.17	1221.33	1241.33	1339.29	1250.88	1112.43	middle
1167	mmu-miR-203b-3p	TTGAACTGTCAAGAACCACTGG	down	0.991612	-0.0121526	0.995533	1.5963	1.58291	0	0	4.78889	0	4.74872	0	0	0	5	0	5	0	low
1168	mmu-miR-200b-3p_R+1	TAATACTGCCTGGTAATGATGAC	up	1.00021	0.000307128	0.996352	160.596	160.63	158.538	163.302	159.949	163.852	170.004	148.036	182	145	167	158	179	141	middle
1169	efu-miR-9226_1ss22GT	TCAAGTCCCTGTTCGGGCGCCT	up	1.00094	0.00134946	0.996787	7.98206	7.98953	8.71087	9.00977	6.22556	6.22222	10.9221	6.82433	10	8	6.5	6	11.5	6.5	middle
1170	cgr-miR-1260_R+1_2	ATCCCACCGCTGCCACCAC	up	1.00241	0.00347621	0.996848	3.60723	3.61593	3.0488	3.94177	3.83111	0	6.64821	4.19959	3.5	3.5	4	0	7	4	low
1171	cgr-miR-1260_R+1_1	ATCCCACCGCTGCCACCAA	up	1.00241	0.00347621	0.996848	3.60723	3.61593	3.0488	3.94177	3.83111	0	6.64821	4.19959	3.5	3.5	4	0	7	4	low
1172	PC-3p-34455_11	TCTCGGTGGGACCTCCAGAAA	up	1.00439	0.00632565	0.997675	1.74217	1.74983	5.22652	0	0	0	0	5.24949	6	0	0	0	0	5	low
